# Supplementary material
Source: publisher figshare collection journal article supplement (https://acs.figshare.com/ndownloader/files/5134969)
Supplement: Supplementary file 1 [file 5134969]

data_UNOFA_publ

_pd_block_id
  2004-09-22T15:43|UNOFA|Cara_L._Nygren|Overall

_audit_creation_method  "from EXP file using GSAS2CIF"
_audit_creation_date                   2004-09-22T15:43
_audit_author_name                     "Cara L. Nygren"
_audit_update_record
; 2004-09-22T15:43  Initial CIF as created by GSAS2CIF
;

#=============================================================================
# this information describes the project, paper etc. for the CIF             #
# Acta Cryst. Section C papers and editorial correspondence is generated     #
# from the information in this section                                       #
#                                                                            #
#   (from)   CIF submission form for Rietveld refinements (Acta Cryst. C)    #
#                                                 Version 14 December 1998   #
#=============================================================================
# 1. SUBMISSION DETAILS

_publ_contact_author_name            ?   # Name of author for correspondence
_publ_contact_author_address             # Address of author for correspondence
; ?
;
_publ_contact_author_email           ?
_publ_contact_author_fax             ?
_publ_contact_author_phone           ?

_publ_contact_letter
; ?
;

_publ_requested_journal              ?
_publ_requested_coeditor_name        ?
_publ_requested_category             ?   # Acta C: one of CI/CM/CO/FI/FM/FO

#==============================================================================

# 2. PROCESSING SUMMARY (IUCr Office Use Only)

_journal_data_validation_number      ?

_journal_date_recd_electronic        ?
_journal_date_to_coeditor            ?
_journal_date_from_coeditor          ?
_journal_date_accepted               ?
_journal_date_printers_first         ?
_journal_date_printers_final         ?
_journal_date_proofs_out             ?
_journal_date_proofs_in              ?
_journal_coeditor_name               ?
_journal_coeditor_code               ?
_journal_coeditor_notes
; ?
;
_journal_techeditor_code             ?
_journal_techeditor_notes
; ?
;
_journal_coden_ASTM                  ?
_journal_name_full                   ?
_journal_year                        ?
_journal_volume                      ?
_journal_issue                       ?
_journal_page_first                  ?
_journal_page_last                   ?
_journal_paper_category              ?
_journal_suppl_publ_number           ?
_journal_suppl_publ_pages            ?

#==============================================================================

# 3. TITLE AND AUTHOR LIST

_publ_section_title
; ?
;
_publ_section_title_footnote
; ?
;

# The loop structure below should contain the names and addresses of all
# authors, in the required order of publication. Repeat as necessary.

loop_
	_publ_author_name
        _publ_author_footnote
	_publ_author_address
 ?                                   #<--'Last name, first name'
; ?
;
; ?
;

#==============================================================================

# 4. TEXT

_publ_section_synopsis
;  ?
;
_publ_section_abstract
; ?
;
_publ_section_comment
; ?
;
_publ_section_exptl_prep      # Details of the preparation of the sample(s)
                              # should be given here.
; ?
;
_publ_section_exptl_refinement
; ?
;
_publ_section_references
; ?
;
_publ_section_figure_captions
; ?
;
_publ_section_acknowledgements
; ?
;

#=============================================================================
# 5. OVERALL REFINEMENT & COMPUTING DETAILS

_refine_special_details
; ?
;
_pd_proc_ls_special_details
; ?
;

# The following items are used to identify the programs used.
_computing_molecular_graphics     ?
_computing_publication_material   ?

_refine_ls_weighting_scheme       ?
_refine_ls_weighting_details      ?
_refine_ls_hydrogen_treatment     ?
_refine_ls_extinction_method      ?
_refine_ls_extinction_coef        ?
_refine_ls_number_constraints     ?

_refine_ls_restrained_S_all       ?
_refine_ls_restrained_S_obs       ?

#==============================================================================
# 6. SAMPLE PREPARATION DATA

# (In the unusual case where multiple samples are used in a single
#  Rietveld study, this information should be moved into the phase
#  blocks)

# The following three fields describe the preparation of the material.
# The cooling rate is in K/min.  The pressure at which the sample was
# prepared is in kPa.  The temperature of preparation is in K.

_pd_prep_cool_rate                ?
_pd_prep_pressure                 ?
_pd_prep_temperature              ?

_pd_char_colour                   ?       # use ICDD colour descriptions
data_UNOFA_overall

_refine_ls_shift/su_max                0.01
_refine_ls_shift/su_mean               0.00
_computing_structure_refinement        GSAS
_refine_ls_number_parameters           313
_refine_ls_goodness_of_fit_all         1.02
_refine_ls_number_restraints           0
_refine_ls_matrix_type                 full

# pointers to the phase blocks
loop_   _pd_phase_block_id
      2004-09-22T15:43|UNOFA_phase1|Cara_L._Nygren||
# pointers to the diffraction patterns
loop_   _pd_block_diffractogram_id
      ?

# Information for phase 1
data_UNOFA_phase_1

_pd_block_id
  2004-09-22T15:43|UNOFA_phase1|Cara_L._Nygren||

#==============================================================================
# 7. CHEMICAL, STRUCTURAL AND CRYSTAL DATA

_pd_char_particle_morphology      ?

_chemical_name_systematic
; ?
;
_chemical_name_common             ?
_chemical_formula_moiety          ?
_chemical_formula_structural      ?
_chemical_formula_analytical      ?
_chemical_melting_point           ?
_chemical_compound_source         ?       # for minerals and
                                          # natural products
_symmetry_space_group_name_Hall   ?

_cell_measurement_temperature     ?

_cell_special_details
; ?
;

_geom_special_details             ?

# The following item identifies the program(s) used (if appropriate).
_computing_structure_solution     ?

#==============================================================================

# 8. Phase information from GSAS

_pd_phase_name                         unofa_neutron_123K
_cell_length_a                         6.726
_cell_length_b                         6.732
_cell_length_c                         19.418
_cell_angle_alpha                      90.0
_cell_angle_beta                       95.391
_cell_angle_gamma                      90.0
_cell_volume                           875.34692
_symmetry_cell_setting                 monoclinic
_symmetry_space_group_name_H-M         "P 21/n"
loop_ _symmetry_equiv_pos_site_id _symmetry_equiv_pos_as_xyz
       1 +x,+y,+z 
       2 -x+1/2,+y+1/2,-z+1/2 
      -1 -x,-y,-z 
      -2 +x+1/2,-y+1/2,+z+1/2 

# ATOMIC COORDINATES AND DISPLACEMENT PARAMETERS


loop_
      _atom_site_type_symbol
      _atom_site_label
      _atom_site_fract_x
      _atom_site_fract_y
      _atom_site_fract_z
      _atom_site_occupancy
      _atom_site_thermal_displace_type
      _atom_site_U_iso_or_equiv
      _atom_site_symmetry_multiplicity
C 
C1      0.3404(4)    0.3919(4)    0.05746(17)  1.0        Uani   0.01754       4
C 
C2      0.2301(4)    0.3684(4)    0.17392(16)  1.0        Uani   0.01728       4
C 
C3      0.4925(4)    0.1696(5)    0.14019(17)  1.0        Uani   0.02124       4
C 
C4      0.1759(4)    0.0248(4)    0.15608(17)  1.0        Uani   0.01911       4
C 
C5      0.2845(4)    0.0498(4)    0.04301(18)  1.0        Uani   0.02028       4
C 
C6      0.0129(4)    0.2439(4)    0.07303(18)  1.0        Uani   0.01721       4
C 
C7     -0.2484(4)    0.6794(4)    0.19257(17)  1.0        Uani   0.02275       4
N 
N1      0.16049(25)  0.40722(25)  0.09867(11)  1.0        Uani   0.01555       4
N 
N2      0.32111(27)  0.17661(27)  0.18204(11)  1.0        Uani   0.01684       4
N 
N3      0.10853(27)  0.05468(26)  0.08241(11)  1.0        Uani   0.01882       4
N 
N4      0.43218(27)  0.19989(27)  0.06684(12)  1.0        Uani   0.02052       4
O 
O1      0.0801(5)    0.5934(4)    0.08800(19)  1.0        Uani   0.0195        4
O 
O2     -0.2486(4)    0.6305(4)    0.12853(19)  1.0        Uani   0.02252       4
O 
O3     -0.3964(5)    0.7104(5)    0.22375(22)  1.0        Uani   0.03018       4
H 
H1A     0.2830(8)    0.4197(8)    0.00402(31)  1.0        Uani   0.02772       4
H 
H1B     0.4448(9)    0.5116(7)    0.07637(34)  1.0        Uani   0.03302       4
H 
H2A     0.3322(8)    0.4911(8)    0.18938(34)  1.0        Uani   0.03303       4
H 
H2B     0.0941(8)    0.3790(8)    0.20358(30)  1.0        Uani   0.02842       4
H 
H3A     0.5629(9)    0.0233(8)    0.1460(4)    1.0        Uani   0.03778       4
H 
H3B     0.6011(8)    0.2834(8)    0.1585(4)    1.0        Uani   0.0334        4
H 
H4A     0.2468(10)  -0.1242(9)    0.1622(4)    1.0        Uani   0.04403       4
H 
H4B     0.0475(9)    0.0341(8)    0.18685(35)  1.0        Uani   0.03528       4
H 
H5A     0.2333(8)    0.0735(9)   -0.01188(33)  1.0        Uani   0.03574       4
H 
H5B     0.3562(8)   -0.1000(8)    0.05052(33)  1.0        Uani   0.03035       4
H 
H6A    -0.1138(9)    0.2560(8)    0.1028(4)    1.0        Uani   0.03383       4
H 
H6B    -0.0316(9)    0.2747(7)    0.0184(4)    1.0        Uani   0.03592       4
H 
H7     -0.1002(9)    0.6900(10)   0.2214(4)    1.0        Uani   0.05191       4
H 
H1     -0.0810(9)    0.6091(7)    0.11173(31)  1.0        Uani   0.03032       4

loop_ _atom_site_aniso_label
      _atom_site_aniso_U_11
      _atom_site_aniso_U_12
      _atom_site_aniso_U_13
      _atom_site_aniso_U_22
      _atom_site_aniso_U_23
      _atom_site_aniso_U_33
C1      0.0144(13)  -0.0010(11)   0.0029(13)   0.0174(15)   0.0004(13)   0.0211(20) 
C2      0.0221(15)   0.0025(12)   0.0064(14)   0.0152(16)  -0.0020(12)   0.0155(18) 
C3      0.0168(14)   0.0033(13)  -0.0021(13)   0.0207(17)   0.0000(13)   0.0254(19) 
C4      0.0217(15)   0.0007(12)   0.0000(14)   0.0196(16)  -0.0004(12)   0.0157(19) 
C5      0.0272(15)   0.0025(12)   0.0045(14)   0.0132(15)  -0.0004(13)   0.0208(20) 
C6      0.0212(15)  -0.0012(11)   0.0019(15)   0.0145(15)  -0.0024(12)   0.0160(19) 
C7      0.0234(16)  -0.0012(12)   0.0013(14)   0.0227(14)   0.0001(13)   0.0220(20) 
N1      0.0169(9)   -0.0033(8)    0.0049(9)    0.0130(10)  -0.0011(9)    0.0174(12) 
N2      0.0200(10)   0.0034(8)    0.0039(9)    0.0172(10)   0.0031(8)    0.0138(12) 
N3      0.0223(10)  -0.0038(8)    0.0023(9)    0.0167(11)  -0.0020(9)    0.0176(13) 
N4      0.0177(10)   0.0023(8)    0.0019(10)   0.0205(10)  -0.0034(9)    0.0234(14) 
O1      0.0247(16)   0.0033(13)   0.0036(15)   0.0137(16)  -0.0002(14)   0.0204(20) 
O2      0.0170(16)  -0.0020(13)   0.0052(15)   0.0302(19)  -0.0057(15)   0.0210(22) 
O3      0.0253(17)   0.0050(15)   0.0140(17)   0.0319(18)  -0.0023(17)   0.0355(23) 
H1A     0.0347(29)  -0.0027(25)   0.0074(26)   0.0330(29)   0.0079(26)   0.016(4)   
H1B     0.0496(33)  -0.0113(24)   0.0035(31)   0.0167(27)  -0.0028(24)   0.033(4)   
H2A     0.0361(31)  -0.0036(24)  -0.0030(29)   0.0256(30)  -0.0035(26)   0.036(4)   
H2B     0.0273(26)   0.0039(23)   0.0059(25)   0.0373(33)   0.0098(24)   0.021(4)   
H3A     0.0443(35)   0.0173(28)  -0.0013(31)   0.0303(32)  -0.0021(27)   0.038(4)   
H3B     0.0231(27)  -0.0130(25)  -0.0015(27)   0.0355(32)   0.0095(29)   0.041(4)   
H4A     0.054(4)    -0.0027(30)  -0.0060(33)   0.036(4)     0.0131(28)   0.040(5)   
H4B     0.0419(35)  -0.0027(26)   0.0190(30)   0.037(4)     0.0088(28)   0.030(4)   
H5A     0.0405(32)  -0.0039(30)   0.0059(29)   0.056(4)    -0.0016(30)   0.0115(34) 
H5B     0.0398(30)   0.0051(24)   0.0079(28)   0.0160(26)  -0.0038(25)   0.036(4)   
H6A     0.0295(31)  -0.0094(25)   0.0014(30)   0.0365(35)  -0.0015(27)   0.035(4)   
H6B     0.051(4)    -0.0033(25)  -0.0221(31)   0.0217(28)   0.0018(26)   0.030(4)   
H7      0.0266(31)  -0.0109(32)  -0.0076(32)   0.085(5)    -0.015(4)     0.042(5)   
H1      0.043(4)     0.0035(24)   0.0048(29)   0.0201(29)  -0.0013(25)   0.028(4)   

loop_ _atom_type_symbol
      _atom_type_number_in_cell
                   C_ 28.0        
                   N_ 16.0        
                   O_ 12.0        
                   H_ 56.0        
 
# If you change Z, be sure to change all 3 of the following
_chemical_formula_sum                  "C7 H14 N4 O3"
_chemical_formula_weight               202.21
_cell_formula_units_Z                  4

# MOLECULAR GEOMETRY

loop_
      _geom_bond_atom_site_label_1
      _geom_bond_atom_site_label_2
      _geom_bond_distance
      _geom_bond_site_symmetry_1
      _geom_bond_site_symmetry_2
      _geom_bond_publ_flag
  C1        N1              1.5157(33)  .      1_555  N
  C1        N4              1.4366(31)  .      1_555  N
  C1        H1A               1.089(7)  .      1_555  N
  C1        H1B               1.109(7)  .      1_555  N
  C2        N1                1.515(4)  .      1_555  N
  C2        N2              1.4313(31)  .      1_555  N
  C2        H2A               1.098(7)  .      1_555  N
  C2        H2B               1.128(7)  .      1_555  N
  C3        N2                1.472(4)  .      1_555  N
  C3        N4                1.458(4)  .      1_555  N
  C3        H3A               1.094(7)  .      1_555  N
  C3        H3B               1.095(7)  .      1_555  N
  C4        N2              1.4699(33)  .      1_555  N
  C4        N3                1.473(4)  .      1_555  N
  C4        H4A               1.112(8)  .      1_555  N
  C4        H4B               1.097(8)  .      1_555  N
  C5        N3                1.469(4)  .      1_555  N
  C5        N4              1.4615(34)  .      1_555  N
  C5        H5A               1.100(8)  .      1_555  N
  C5        H5B               1.122(6)  .      1_555  N
  C6        N1              1.5328(32)  .      1_555  N
  C6        N3              1.4307(32)  .      1_555  N
  C6        H6A               1.077(8)  .      1_555  N
  C6        H6B               1.094(8)  .      1_555  N
  C7        O2                1.286(5)  .      1_555  N
  C7        O3                1.230(4)  .      1_555  N
  C7        H7                1.099(7)  .      1_555  N
  C7        H1                2.071(7)  .      1_555  N
  N1        C1              1.5157(33)  .      1_555  N
  N1        C2                1.515(4)  .      1_555  N
  N1        C6              1.5328(32)  .      1_555  N
  N1        O1              1.3727(33)  .      1_555  N
  N2        C2              1.4313(31)  .      1_555  N
  N2        C3                1.472(4)  .      1_555  N
  N2        C4              1.4699(33)  .      1_555  N
  N3        C4                1.473(4)  .      1_555  N
  N3        C5                1.469(4)  .      1_555  N
  N3        C6              1.4307(32)  .      1_555  N
  N4        C1              1.4366(31)  .      1_555  N
  N4        C3                1.458(4)  .      1_555  N
  N4        C5              1.4615(34)  .      1_555  N
  O1        N1              1.3727(33)  .      1_555  N
  O1        H1                1.221(7)  .      1_555  N
  O2        C7                1.286(5)  .      1_555  N
  O2        H7                2.018(8)  .      1_555  N
  O2        H1                1.211(7)  .      1_555  N
  O3        C7                1.230(4)  .      1_555  N
  O3        H7                2.002(7)  .      1_555  N
  H1A       C1                1.089(7)  .      1_555  N
  H1A       H1B               1.804(8)  .      1_555  N
  H1B       C1                1.109(7)  .      1_555  N
  H1B       H1A               1.804(8)  .      1_555  N
  H2A       C2                1.098(7)  .      1_555  N
  H2A       H2B               1.815(7)  .      1_555  N
  H2B       C2                1.128(7)  .      1_555  N
  H2B       H2A               1.815(7)  .      1_555  N
  H3A       C3                1.094(7)  .      1_555  N
  H3A       H3B               1.783(7)  .      1_555  N
  H3B       C3                1.095(7)  .      1_555  N
  H3B       H3A               1.783(7)  .      1_555  N
  H4A       C4                1.112(8)  .      1_555  N
  H4A       H4B               1.812(9)  .      1_555  N
  H4B       C4                1.097(8)  .      1_555  N
  H4B       H4A               1.812(9)  .      1_555  N
  H5A       C5                1.100(8)  .      1_555  N
  H5A       H5B               1.824(8)  .      1_555  N
  H5B       C5                1.122(6)  .      1_555  N
  H5B       H5A               1.824(8)  .      1_555  N
  H6A       C6                1.077(8)  .      1_555  N
  H6A       H6B              1.782(10)  .      1_555  N
  H6B       C6                1.094(8)  .      1_555  N
  H6B       H6A              1.782(10)  .      1_555  N
  H7        C7                1.099(7)  .      1_555  N
  H7        O2                2.018(8)  .      1_555  N
  H7        O3                2.002(7)  .      1_555  N
  H1        C7                2.071(7)  .      1_555  N
  H1        O1                1.221(7)  .      1_555  N
  H1        O2                1.211(7)  .      1_555  N

loop_
      _geom_angle_atom_site_label_1
      _geom_angle_atom_site_label_2
      _geom_angle_atom_site_label_3
      _geom_angle
      _geom_angle_site_symmetry_1
      _geom_angle_site_symmetry_2
      _geom_angle_site_symmetry_3
      _geom_angle_publ_flag
  N1        C1        N4              110.43(22)      1_555  .      1_555  N
  N1        C1        H1A             105.18(34)      1_555  .      1_555  N
  N1        C1        H1B               106.7(4)      1_555  .      1_555  N
  N4        C1        H1A             112.64(35)      1_555  .      1_555  N
  N4        C1        H1B             111.15(35)      1_555  .      1_555  N
  H1A       C1        H1B               110.4(5)      1_555  .      1_555  N
  N1        C2        N2              110.62(21)      1_555  .      1_555  N
  N1        C2        H2A               105.2(4)      1_555  .      1_555  N
  N1        C2        H2B             106.85(32)      1_555  .      1_555  N
  N2        C2        H2A             113.47(34)      1_555  .      1_555  N
  N2        C2        H2B             111.09(33)      1_555  .      1_555  N
  H2A       C2        H2B               109.2(5)      1_555  .      1_555  N
  N2        C3        N4              112.00(22)      1_555  .      1_555  N
  N2        C3        H3A               109.0(4)      1_555  .      1_555  N
  N2        C3        H3B               109.4(4)      1_555  .      1_555  N
  N4        C3        H3A               107.8(4)      1_555  .      1_555  N
  N4        C3        H3B               109.5(4)      1_555  .      1_555  N
  H3A       C3        H3B               109.1(5)      1_555  .      1_555  N
  N2        C4        N3              111.83(23)      1_555  .      1_555  N
  N2        C4        H4A               109.0(4)      1_555  .      1_555  N
  N2        C4        H4B               107.8(4)      1_555  .      1_555  N
  N3        C4        H4A               108.4(5)      1_555  .      1_555  N
  N3        C4        H4B               109.6(4)      1_555  .      1_555  N
  H4A       C4        H4B               110.2(5)      1_555  .      1_555  N
  N3        C5        N4              112.13(24)      1_555  .      1_555  N
  N3        C5        H5A               107.9(4)      1_555  .      1_555  N
  N3        C5        H5B               108.1(4)      1_555  .      1_555  N
  N4        C5        H5A               110.4(4)      1_555  .      1_555  N
  N4        C5        H5B             108.00(35)      1_555  .      1_555  N
  H5A       C5        H5B               110.3(5)      1_555  .      1_555  N
  N1        C6        N3              109.13(20)      1_555  .      1_555  N
  N1        C6        H6A             107.01(35)      1_555  .      1_555  N
  N1        C6        H6B             106.76(33)      1_555  .      1_555  N
  N3        C6        H6A               111.6(4)      1_555  .      1_555  N
  N3        C6        H6B               111.8(4)      1_555  .      1_555  N
  H6A       C6        H6B               110.3(5)      1_555  .      1_555  N
  O2        C7        O3              126.28(34)      1_555  .      1_555  N
  O2        C7        H7                115.3(5)      1_555  .      1_555  N
  O3        C7        H7                118.4(5)      1_555  .      1_555  N
  C1        N1        C2              107.93(19)      1_555  .      1_555  N
  C1        N1        C6              107.73(21)      1_555  .      1_555  N
  C1        N1        O1              107.77(22)      1_555  .      1_555  N
  C2        N1        C6              108.75(20)      1_555  .      1_555  N
  C2        N1        O1              112.63(22)      1_555  .      1_555  N
  C6        N1        O1              111.84(20)      1_555  .      1_555  N
  C2        N2        C3              108.50(22)      1_555  .      1_555  N
  C2        N2        C4              109.02(20)      1_555  .      1_555  N
  C3        N2        C4              108.52(24)      1_555  .      1_555  N
  C4        N3        C5              108.27(21)      1_555  .      1_555  N
  C4        N3        C6              109.81(22)      1_555  .      1_555  N
  C5        N3        C6              109.16(22)      1_555  .      1_555  N
  C1        N4        C3              109.06(23)      1_555  .      1_555  N
  C1        N4        C5              108.10(20)      1_555  .      1_555  N
  C3        N4        C5              109.32(24)      1_555  .      1_555  N
  N1        O1        H1              111.90(34)      1_555  .      1_555  N
  C7        O2        H1                112.0(4)      1_555  .      1_555  N
  O1        H1        O2                173.3(6)      1_555  .      1_555  N
data_UNOFA_s_01


loop_
      _refln_index_h
      _refln_index_k
      _refln_index_l
      _refln_observed_status
      _refln_F_squared_meas
      _refln_F_squared_calc
      _refln_phase_calc
 -13  -4   3 <   18(32)     0.      0.00 
 -13  -3   1 <    4(17)     0.     180.00
 -12  -5  -4 <   48(14)     3.      0.00 
 -12  -5   0 <   68(28)     8.     180.00
 -12  -4  -4 <   53(26)     2.      0.00 
 -12  -4   1 <  -2.377      9.078  180.00
 -12  -4   3 <   18(28)     1.     180.00
 -12  -4   4 <    5(17)     0.      0.00 
 -12  -3   1 <   20(19)     2.      0.00 
 -12  -3   3 < -16.891      0.359  180.00
 -11  -7   0 <   33(29)     0.     180.00
 -11  -6  -3 <  -4.927      0.865   0.00 
 -11  -6   0 <  -1.212      4.943   0.00 
 -11  -5  -2 <   53(17)    19.      0.00 
 -11  -5  -1 <   66(18)    22.     180.00
 -11  -4  -4 <   34(22)     2.      0.00 
 -11  -4  -3 <    7(12)    16.     180.00
 -11  -4  -2 <   44(12)    32.     180.00
 -11  -3  -3 <    2(11)     1.     180.00
 -11  -3  -1 <    9(15)     4.      0.00 
 -11  -3   0 <    6(19)     5.      0.00 
 -11  -3   2 <   11(11)     1.      0.00 
 -11  -2   2 < -16.311      1.447  180.00
 -11  -2   3 <   31(16)     5.     180.00
 -10  -7   1 <  -2.137      4.637  180.00
 -10  -6   3 <   24(21)     1.      0.00 
 -10  -5  -1 <    5(11)     9.     180.00
 -10  -5   1 <    9(22)     5.     180.00
 -10  -5   2 <  -0.711      5.936  180.00
 -10  -5   3 <   44(19)     3.     180.00
 -10  -4  -3 <    7(10)     5.     180.00
 -10  -4  -2 <  -4.530      0.010  180.00
 -10  -4   0 < -22.207     11.127   0.00 
 -10  -4   1 <    8(15)    12.      0.00 
 -10  -4   3 <   12(15)    11.      0.00 
 -10  -3  -3 <   21(9)     15.      0.00 
 -10  -3   1 <   22(18)     6.     180.00
 -10  -3   3 <    2(13)     5.      0.00 
 -10  -2   1 < -11.600      8.080   0.00 
 -10  -2   2 <   15(9)     11.     180.00
  -9  -5  -4 <   36(12)    15.      0.00 
  -9  -5  -3 <   25(9)     10.     180.00
  -9  -5  -2 <  -7.492      0.615   0.00 
  -9  -5  -1 <    6(11)     1.      0.00 
  -9  -4  -1 <  -2.330      0.547  180.00
  -9  -4   3 <   15(8)      6.      0.00 
  -9  -3  -2 <    7(7)      2.      0.00 
  -9  -3  -1 o    3(7)      0.      0.00 
  -9  -2  -3 o    4(7)      3.      0.00 
  -9  -2  -2 o    8(6)      0.     180.00
  -9  -2  -1 o -11.695      8.753  180.00
  -9  -2   0 o   35(11)    47.      0.00 
  -8  -5  -3 o  -7.215      0.916   0.00 
  -8  -5  -2 o    7(13)     4.     180.00
  -8  -5   0 o   20(9)     13.     180.00
  -8  -4  -3 o    7(6)      3.     180.00
  -8  -4   1 o  -2.022      0.216   0.00 
  -8  -4   2 o   11(9)     13.      0.00 
  -8  -3  -2 o    2(6)      1.     180.00
  -8  -3  -1 o  -0.392      8.834   0.00 
  -8  -3   0 o    1(8)      1.      0.00 
  -8  -3   3 o   15(6)      6.     180.00
  -8  -2   1 o  -1.265      5.537   0.00 
  -7  -5   1 o    9(5)     14.      0.00 
  -7  -4  -3 o  -4.332      5.057   0.00 
  -7  -4  -2 o  -2.821      1.394   0.00 
  -7  -4  -1 o   24(10)    28.      0.00 
  -7  -4   0 o   55(7)     76.      0.00 
  -7  -4   1 o    1(6)      0.      0.00 
  -7  -4   2 o    4(6)     14.     180.00
  -7  -3  -2 o  -5.601      0.893  180.00
  -7  -3   0 o -16.019      0.573  180.00
  -7  -2  -2 o   22(4)     25.      0.00 
  -7  -2   0 o  -3.260      1.451  180.00
  -7  -2   1 o   18(8)     14.     180.00
  -7  -2   2 o   21(9)     18.      0.00 
  -6  -4   0 o  -0.925      0.136  180.00
  -6  -4   1 o  -1.870      0.246  180.00
  -6  -3   0 o   4.3(32)    8.3     0.00 
  -6  -3   1 o  -0.794      0.000  180.00
  -6  -3   2 o   21(5)      9.      0.00 
  -6  -2  -2 o   0.6(20)    1.3     0.00 
  -6  -2  -1 o   56(5)     54.      0.00 
  -6  -2   1 o   1.3(29)    4.9     0.00 
  -5  -3  -2 o  18.1(30)   13.1    180.00
  -5  -3  -1 o   39(4)     35.      0.00 
  -5  -3   0 o   8.9(17)   14.3     0.00 
  -5  -3   1 o   87(4)     91.      0.00 
  -5  -2  -2 o  -1.353      0.136  180.00
  -5  -2  -1 o  15.4(25)   15.2    180.00
  -5  -2   1 o  15.1(18)   23.5    180.00
  -5  -1   0 o  69.6(28)   71.2    180.00
  -5  -1   1 o  22.7(25)   19.8    180.00
  -4  -2  -1 o  54.3(21)   50.9    180.00
  -4  -2   0 o  75.7(25)   71.3    180.00
  -4  -2   1 o   7.8(14)    9.4    180.00
  -4  -1  -1 o   1.0(9)     1.0     0.00 
  -4  -1   0 o  18.5(11)   18.6     0.00 
  -4  -1   1 o   2.0(6)     2.1    180.00
  -3  -2   0 o  106.5(21)  106.6   180.00
  -3  -1  -1 o   3.3(5)     3.9    180.00
  -3  -1   1 o  13.8(8)    13.3    180.00
  -2  -1   0 o  84.3(17)   84.3     0.00 
_reflns_number_total                   56
_reflns_limit_h_min                    -13
_reflns_limit_h_max                    -2
_reflns_limit_k_min                    -7
_reflns_limit_k_max                    -1
_reflns_limit_l_min                    -4
_reflns_limit_l_max                    4
_reflns_d_resolution_high              0.494
_reflns_d_resolution_low               2.998
data_UNOFA_s_02


loop_
      _refln_index_h
      _refln_index_k
      _refln_index_l
      _refln_observed_status
      _refln_F_squared_meas
      _refln_F_squared_calc
      _refln_phase_calc
 -12  -4  -9 <   37(15)    1.     180.00
 -12  -3 -10 < -19.226     0.623   0.00 
 -12  -3  -9 <    5(17)    0.     180.00
 -11  -6 -10 <   23(16)    2.     180.00
 -11  -5 -10 <  -0.187     6.448  180.00
 -11  -5  -9 <   56(22)    1.      0.00 
 -11  -4 -13 <   23(15)    1.     180.00
 -11  -4 -12 <   35(35)    1.     180.00
 -11  -3 -15 < -16.830     0.000  180.00
 -11  -3 -14 <   14(16)    1.      0.00 
 -11  -3 -11 <    9(14)    0.     180.00
 -11  -2 -15 <    4(21)    0.      0.00 
 -11  -2 -11 <   21(19)    0.      0.00 
 -10  -6 -13 <   19(31)    1.     180.00
 -10  -6 -12 <  -5.648     5.293  180.00
 -10  -6 -11 < -19.186     0.403  180.00
 -10  -5 -18 <  -7.109     2.548   0.00 
 -10  -5 -17 <   21(15)   10.     180.00
 -10  -5 -14 <    1(16)    9.     180.00
 -10  -5 -13 <   59(28)    2.      0.00 
 -10  -5  -9 <    3(20)    2.      0.00 
 -10  -4 -19 < -15.023     0.014   0.00 
 -10  -4 -14 <   17(15)    0.     180.00
 -10  -4 -13 < -11.522     0.504  180.00
 -10  -4  -8 <   12(11)    6.      0.00 
 -10  -3 -16 <   12(13)    0.     180.00
 -10  -3 -14 <   46(26)    0.     180.00
 -10  -3 -13 <   37(16)    2.      0.00 
 -10  -3 -11 <   24(10)    0.     180.00
 -10  -3  -9 <    1(12)    0.     180.00
 -10  -3  -8 <    6(17)    1.     180.00
 -10  -2 -14 <  -0.329     0.009   0.00 
 -10  -2 -12 < -14.462     0.154   0.00 
 -10  -2 -10 <  -0.482     2.886  180.00
  -9  -5 -18 <    4(13)    8.      0.00 
  -9  -5 -17 <   22(18)   10.     180.00
  -9  -5 -16 <   43(21)   20.      0.00 
  -9  -5 -14 <  -0.023     1.003   0.00 
  -9  -5 -11 <  -4.101     1.335  180.00
  -9  -5  -8 <   57(14)   18.     180.00
  -9  -4 -18 <   12(11)    2.      0.00 
  -9  -4 -17 <   29(12)   11.     180.00
  -9  -4 -16 <   37(12)   21.     180.00
  -9  -4 -15 <  -2.764     0.223   0.00 
  -9  -4 -14 <  -4.368     3.252  180.00
  -9  -4  -9 <  -3.116     5.206   0.00 
  -9  -4  -8 <   37(18)   27.      0.00 
  -9  -3 -16 <  -8.311     2.523   0.00 
  -9  -3 -12 <  -0.855     0.222  180.00
  -9  -3  -9 <  -7.965     0.112  180.00
  -9  -3  -7 <   11(9)     0.      0.00 
  -9  -2 -15 <  -8.486     3.726   0.00 
  -9  -2 -14 <    4(10)    3.     180.00
  -9  -2 -10 <    8(10)   18.      0.00 
  -9  -2  -9 <   26(10)   31.      0.00 
  -8  -5 -15 <   32(13)    9.     180.00
  -8  -5 -14 <    3(10)    3.      0.00 
  -8  -5 -11 <   26(17)   18.     180.00
  -8  -5 -10 <   20(9)    20.      0.00 
  -8  -5  -9 <   14(14)    5.      0.00 
  -8  -4 -15 <  -6.186     0.463   0.00 
  -8  -4 -13 <    8(20)    0.     180.00
  -8  -4 -11 <   60(19)   33.      0.00 
  -8  -4 -10 <   20(16)   16.      0.00 
  -8  -4  -9 <   16(6)    20.      0.00 
  -8  -4  -8 <   71(16)   35.     180.00
  -8  -4  -7 o   24(11)   16.     180.00
  -8  -3 -15 <    6(7)     2.      0.00 
  -8  -3 -14 <    3(8)     6.      0.00 
  -8  -3 -13 <   15(13)    7.     180.00
  -8  -3  -9 o   24(11)   15.     180.00
  -8  -3  -8 o  -2.912     2.595  180.00
  -8  -3  -7 o   27(12)   18.     180.00
  -8  -2 -13 <    8(6)     8.      0.00 
  -8  -2  -9 o  -6.680     3.872   0.00 
  -8  -2  -6 o -13.348     4.236  180.00
  -7  -4 -14 <  -4.453     0.918   0.00 
  -7  -4 -12 o  -7.417     5.231   0.00 
  -7  -4 -11 o  -0.601     4.861   0.00 
  -7  -4  -9 o   44(10)   32.     180.00
  -7  -4  -8 o   76(7)    74.     180.00
  -7  -4  -7 o    1(6)     8.     180.00
  -7  -3 -11 o    6(5)     9.     180.00
  -7  -3 -10 o   20(9)     8.     180.00
  -7  -3  -9 o   10(5)     2.     180.00
  -7  -3  -8 o   15(7)    14.      0.00 
  -7  -2 -10 o   21(6)    12.      0.00 
  -7  -2  -9 o   23(8)    11.     180.00
  -7  -2  -7 o   30(6)    30.      0.00 
  -7  -2  -6 o   134(8)   126.    180.00
  -6  -3 -12 o   1.7(32)   2.7     0.00 
  -6  -3 -10 o  -2.000     0.796  180.00
  -6  -3  -9 o   0.4(31)   1.5    180.00
  -6  -3  -7 o   22(5)    22.     180.00
  -6  -3  -6 o   3.3(27)   0.9    180.00
  -6  -2 -11 o   15(6)     3.      0.00 
  -6  -2  -9 o   47(6)    38.     180.00
  -6  -2  -8 o   19(4)    12.      0.00 
  -6  -2  -7 o   34(4)    20.     180.00
  -6  -2  -5 o   80(5)    78.      0.00 
  -5  -3 -10 o  -3.042     0.042  180.00
  -5  -3  -9 o    1(4)     2.     180.00
  -5  -3  -7 o  44.0(34)  48.5    180.00
  -5  -3  -6 o  33.7(34)  35.0     0.00 
  -5  -2  -9 o  -1.576     4.028  180.00
  -5  -2  -7 o  63.8(33)  66.4     0.00 
  -5  -2  -6 o   57(4)    59.      0.00 
  -5  -2  -5 o  64.6(33)  65.6     0.00 
  -5  -2  -4 o   2.6(21)   0.2     0.00 
  -5  -1  -9 o   62(4)    56.      0.00 
  -5  -1  -8 o   3.4(17)   5.1     0.00 
  -5  -1  -7 o   3.0(20)   1.7     0.00 
  -5  -1  -6 o   2.6(23)   0.6    180.00
  -5  -1  -5 o  10.8(20)  23.5    180.00
  -5  -1  -4 o  80.4(31)  75.5    180.00
  -4  -2  -8 o  10.5(19)  12.9     0.00 
  -4  -2  -7 o   7.8(17)  12.1     0.00 
  -4  -2  -6 o   5.2(14)   4.0     0.00 
  -4  -2  -5 o   0.4(10)   1.7     0.00 
  -4  -2  -4 o  13.8(16)  13.2    180.00
  -4  -1  -7 o   1.1(9)    1.8    180.00
  -4  -1  -6 o   4.5(19)   2.9    180.00
  -4  -1  -5 o  11.2(13)  11.6    180.00
  -4  -1  -4 o   1.2(9)    0.7    180.00
  -4  -1  -3 o  85.7(25)  86.8     0.00 
  -3  -1  -5 o   0.7(7)    1.2     0.00 
  -3  -1  -4 o   4.0(10)   5.3     0.00 
  -3  -1  -3 o  70.2(22)  70.1    180.00
  -2  -1  -4 o   1.1(7)    0.8    180.00
  -2  -1  -3 o   2.3(9)    3.8    180.00
  -2  -1  -2 o  32.3(15)  32.3    180.00
_reflns_number_total                   60
_reflns_limit_h_min                    -12
_reflns_limit_h_max                    -2
_reflns_limit_k_min                    -6
_reflns_limit_k_max                    -1
_reflns_limit_l_min                    -19
_reflns_limit_l_max                    -2
_reflns_d_resolution_high              0.504
_reflns_d_resolution_low               2.797
data_UNOFA_s_03


loop_
      _refln_index_h
      _refln_index_k
      _refln_index_l
      _refln_observed_status
      _refln_F_squared_meas
      _refln_F_squared_calc
      _refln_phase_calc
 -11  -4  23 <  -8.305     0.933   0.00 
 -11  -3  21 <    1(13)    1.      0.00 
 -10  -5  20 <    5(13)    0.     180.00
 -10  -5  21 <  -4.820     0.166  180.00
 -10  -5  23 <  -8.796     0.255  180.00
 -10  -4  19 <    2(13)    4.     180.00
 -10  -4  23 <    8(14)    0.     180.00
 -10  -3  21 <  -2.909     1.597  180.00
 -10  -3  22 <   52(19)   13.     180.00
 -10  -3  23 <    4(15)    0.     180.00
 -10  -3  24 <   18(16)    8.     180.00
  -9  -7  19 <   13(14)    1.     180.00
  -9  -7  21 <    5(23)    3.     180.00
  -9  -7  22 <    1(15)    0.     180.00
  -9  -6  20 <  -6.776     1.391   0.00 
  -9  -5  17 <  -9.219     9.256   0.00 
  -9  -5  20 <   29(13)   11.     180.00
  -9  -5  22 <   16(15)    3.      0.00 
  -9  -5  24 <    6(16)    1.     180.00
  -9  -4  20 <   13(11)    0.     180.00
  -9  -3  17 <    9(10)    3.      0.00 
  -9  -3  20 <   12(11)    1.      0.00 
  -9  -3  21 <   29(16)    1.     180.00
  -9  -3  23 < -14.220     1.976  180.00
  -9  -3  25 <   32(20)   14.      0.00 
  -8  -7  21 < -13.364     0.372   0.00 
  -8  -7  22 <   58(27)    1.      0.00 
  -8  -7  24 <    9(17)    0.      0.00 
  -8  -6  18 <   29(10)    0.     180.00
  -8  -6  19 <   14(12)    9.     180.00
  -8  -6  21 <    9(14)   10.     180.00
  -8  -6  22 <   10(16)    0.      0.00 
  -8  -5  15 <    3(14)    8.      0.00 
  -8  -5  17 <    1(10)    5.     180.00
  -8  -5  19 <   33(21)    0.     180.00
  -8  -5  21 <   21(17)    0.      0.00 
  -8  -5  22 <   19(13)    4.     180.00
  -8  -5  23 < -13.593     2.877   0.00 
  -8  -4  15 <    3(8)     4.     180.00
  -8  -4  18 <  -2.721     2.147   0.00 
  -8  -3  15 <  -0.314     2.833   0.00 
  -8  -3  19 <   48(23)   50.     180.00
  -8  -3  20 <   22(10)   22.     180.00
  -7  -6  17 <   47(17)    9.      0.00 
  -7  -6  19 <    2(12)    1.     180.00
  -7  -6  20 <    5(17)   11.     180.00
  -7  -5  13 o   13(6)     0.     180.00
  -7  -5  19 <   18(14)    3.     180.00
  -7  -5  20 <  -6.115     0.022   0.00 
  -7  -5  21 <   18(11)    0.     180.00
  -7  -4  13 o   17(12)   10.      0.00 
  -7  -4  14 o   11(11)   20.     180.00
  -7  -4  15 o   47(13)   26.      0.00 
  -7  -4  18 <   21(9)    10.     180.00
  -7  -4  19 <    3(8)     0.      0.00 
  -7  -4  20 < -17.211    11.276  180.00
  -7  -4  21 <   27(17)    2.     180.00
  -7  -3  15 o   16(6)    18.      0.00 
  -7  -3  17 o    6(8)     8.     180.00
  -7  -3  18 o   33(17)   25.     180.00
  -7  -3  19 <   69(11)   167.    180.00
  -7  -3  20 <  -6.949    15.150   0.00 
  -7  -2  14 o    0(7)     1.     180.00
  -7  -2  15 o    2(8)    11.     180.00
  -7  -2  16 o   25(5)    62.     180.00
  -7  -2  17 o   57(9)    59.     180.00
  -7  -2  18 o   14(16)   16.      0.00 
  -7  -2  19 o    5(11)    0.      0.00 
  -7  -2  20 <   57(13)   61.      0.00 
  -6  -5  16 o   14(11)    7.     180.00
  -6  -4  13 o   32(10)   29.     180.00
  -6  -4  15 o    6(7)     0.      0.00 
  -6  -3  13 o   13(7)    13.      0.00 
  -6  -3  14 o    0(5)     2.     180.00
  -6  -3  15 o    1(6)     5.     180.00
  -6  -3  16 o   13(12)   14.     180.00
  -6  -3  18 o   97(14)   58.     180.00
  -6  -2  13 o  -0.422     7.584   0.00 
  -6  -2  15 o    6(4)     3.     180.00
  -6  -2  16 o    2(6)     1.     180.00
  -5  -4  12 o   11(6)    13.      0.00 
  -5  -3  10 o   0.0(24)   0.8     0.00 
  -5  -3  11 o   45(7)    46.      0.00 
  -5  -3  12 o    1(4)     2.      0.00 
  -5  -3  13 o   27(6)    26.      0.00 
  -5  -3  14 o   19(9)     9.      0.00 
  -5  -3  15 o   14(5)    14.      0.00 
  -5  -2  10 o  24.5(32)  22.3     0.00 
  -5  -2  11 o  37.4(33)  38.1     0.00 
  -5  -2  12 o   29(4)    32.     180.00
  -5  -2  14 o    1(4)    12.     180.00
  -4  -3   8 o   103(4)   98.      0.00 
  -4  -3   9 o  -4.523     0.030  180.00
  -4  -3  10 o   89(5)    97.      0.00 
  -4  -3  11 o   7.3(28)   9.5     0.00 
  -4  -3  12 o   65(6)    65.      0.00 
  -4  -2   9 o  -0.097     1.072   0.00 
  -4  -2  10 o  21.4(22)  23.8    180.00
  -4  -2  11 o   13(4)    15.     180.00
  -4  -2  12 o   121(7)   119.    180.00
  -3  -2   6 o  30.4(15)  28.3     0.00 
  -3  -2   8 o   1.6(10)   0.1     0.00 
  -3  -1   6 o   2.5(7)    2.5     0.00 
  -3  -1   7 o  44.2(17)  45.0     0.00 
  -3  -1   8 o  -0.234     0.001  180.00
  -2  -1   4 o  56.7(16)  56.7     0.00 
  -2  -1   5 o   5.8(6)    5.3    180.00
  -2  -1   6 o   8.8(7)    8.0    180.00
_reflns_number_total                   52
_reflns_limit_h_min                    -11
_reflns_limit_h_max                    -2
_reflns_limit_k_min                    -7
_reflns_limit_k_max                    -1
_reflns_limit_l_min                    4
_reflns_limit_l_max                    25
_reflns_d_resolution_high              0.494
_reflns_d_resolution_low               2.649
data_UNOFA_s_04


loop_
      _refln_index_h
      _refln_index_k
      _refln_index_l
      _refln_observed_status
      _refln_F_squared_meas
      _refln_F_squared_calc
      _refln_phase_calc
 -13  -3   7 <   15(23)    0.     180.00
 -13  -3  10 <   15(17)    2.     180.00
 -12  -5   7 <   27(20)    0.      0.00 
 -12  -5  11 <    7(24)    2.     180.00
 -12  -5  12 <   18(17)    1.     180.00
 -12  -4   7 < -18.240     4.170  180.00
 -12  -4   9 <    7(17)    0.      0.00 
 -12  -4  10 <   12(16)    3.     180.00
 -12  -4  11 <    9(16)    3.     180.00
 -12  -3   8 <  -4.769     0.093  180.00
 -12  -3  13 <   23(15)    1.     180.00
 -12  -3  14 <  -3.022     0.018  180.00
 -11  -6  10 <   26(22)    1.     180.00
 -11  -6  11 <   10(16)    0.      0.00 
 -11  -6  13 <    9(16)    0.      0.00 
 -11  -5   6 <   84(25)   14.     180.00
 -11  -5   7 <   23(19)   18.      0.00 
 -11  -5   9 <    9(13)    0.     180.00
 -11  -5  10 <   11(15)    9.      0.00 
 -11  -5  11 <   10(14)    4.     180.00
 -11  -5  15 < -14.627     1.776  180.00
 -11  -4   6 <   24(17)   16.      0.00 
 -11  -4   8 <   16(13)    5.      0.00 
 -11  -4   9 <   24(12)   25.     180.00
 -11  -4  14 <  -6.221     0.003   0.00 
 -11  -3   7 <    7(11)    0.      0.00 
 -11  -3  10 <  -6.410     3.571  180.00
 -10  -6   7 <   27(11)    1.      0.00 
 -10  -6   8 <  -3.465     0.223   0.00 
 -10  -6  10 <   20(13)    2.     180.00
 -10  -6  12 <    5(15)    8.      0.00 
 -10  -6  13 < -13.240     1.534  180.00
 -10  -5   6 <   20(9)    26.      0.00 
 -10  -5   7 <   32(22)   37.      0.00 
 -10  -5  11 <   11(13)    2.     180.00
 -10  -5  13 <    7(15)    4.     180.00
 -10  -4   5 <    7(10)   15.      0.00 
 -10  -4   6 <    3(10)   10.     180.00
 -10  -4   8 <    5(10)   22.     180.00
 -10  -4   9 <   67(19)   40.     180.00
 -10  -4  14 <   23(18)    2.      0.00 
 -10  -3   9 <   14(18)    2.      0.00 
 -10  -3  10 <  -4.480     1.151   0.00 
 -10  -3  11 <  -0.171     1.119   0.00 
  -9  -6  11 <  -4.988    10.733   0.00 
  -9  -5   5 <   19(14)    4.      0.00 
  -9  -5   6 <    9(17)    1.      0.00 
  -9  -5  11 <    2(11)    8.     180.00
  -9  -5  12 <    4(11)    0.      0.00 
  -9  -4   5 <    4(10)    7.     180.00
  -9  -4   6 <   14(8)    15.     180.00
  -9  -4   7 <  -4.876     6.168  180.00
  -9  -4   9 <   23(8)     3.      0.00 
  -9  -3   5 o  -0.655     2.238   0.00 
  -9  -3   6 o   27(13)    9.      0.00 
  -9  -3   9 <   18(11)    1.     180.00
  -8  -5   8 <    1(13)    2.     180.00
  -8  -5   9 <   12(8)     2.      0.00 
  -8  -4   5 o  -0.195     6.747  180.00
  -8  -4   6 o    6(6)     2.     180.00
  -8  -4  11 o   13(13)    8.      0.00 
  -8  -3   4 o    6(4)     5.      0.00 
  -8  -3   6 o   18(8)     8.      0.00 
  -8  -3   7 o   10(5)     7.     180.00
  -8  -3   8 o   27(10)   16.     180.00
  -8  -3  10 o   45(8)    40.     180.00
  -8  -2   5 o   21(4)    20.     180.00
  -8  -2   6 o  -2.650     0.863  180.00
  -8  -2   7 o   35(9)    31.     180.00
  -8  -2   9 o   57(7)    64.      0.00 
  -8  -2  10 o   17(8)    18.      0.00 
  -8  -2  11 o   31(5)    32.      0.00 
  -7  -4   3 o   2.4(34)   4.9    180.00
  -7  -4   4 o   26(5)    25.     180.00
  -7  -4   6 o    4(10)    5.     180.00
  -7  -4   7 o    8(4)     0.     180.00
  -7  -4   8 o  -0.620     0.744  180.00
  -7  -3   6 o   8.7(33)   0.1     0.00 
  -7  -3   7 o   18(5)    10.     180.00
  -7  -3   8 o   21(7)     9.      0.00 
  -7  -3   9 o    9(7)    13.     180.00
  -7  -2   4 o  -2.633     0.903   0.00 
  -7  -2   5 o    5(4)     2.     180.00
  -7  -2   6 o  -0.313    11.598  180.00
  -7  -2   9 o   47(5)    48.      0.00 
  -6  -3   3 o   6.8(20)  17.6     0.00 
  -6  -3   4 o   20(5)    18.      0.00 
  -6  -3   5 o   31(4)    27.     180.00
  -6  -3   6 o   27(5)    16.     180.00
  -6  -3   8 o   0.3(30)   3.4    180.00
  -6  -2   3 o   70(4)    64.     180.00
  -6  -2   4 o   0.5(19)   0.7    180.00
  -6  -2   5 o   1.9(21)   7.1    180.00
  -6  -2   7 o    6(4)     8.      0.00 
  -6  -2   8 o   5.3(24)   0.1    180.00
  -5  -3   3 o   5.5(16)   7.8    180.00
  -5  -3   4 o   4.0(21)   9.1    180.00
  -5  -3   5 o   75(4)    71.     180.00
  -5  -3   6 o  23.8(26)  22.7     0.00 
  -5  -2   3 o  95.7(33)  90.5    180.00
  -5  -2   4 o   8.5(27)   6.1     0.00 
  -5  -2   5 o   6.2(19)   3.5     0.00 
  -5  -2   6 o   90(4)    88.      0.00 
  -4  -2   2 o  14.0(13)  13.0    180.00
  -4  -2   3 o  57.2(23)  60.4     0.00 
  -4  -2   4 o   268(5)   274.     0.00 
  -4  -2   5 o  15.4(22)  10.4    180.00
  -4  -1   3 o  16.0(12)  17.9     0.00 
  -4  -1   4 o  22.7(19)  18.8    180.00
  -4  -1   5 o   9.1(9)    9.1    180.00
  -3  -1   2 o   1.7(10)   0.9    180.00
  -3  -1   3 o  51.6(21)  51.9    180.00
  -2  -1   2 o   1.8(6)    3.5    180.00
_reflns_number_total                   57
_reflns_limit_h_min                    -13
_reflns_limit_h_max                    -2
_reflns_limit_k_min                    -6
_reflns_limit_k_max                    -1
_reflns_limit_l_min                    2
_reflns_limit_l_max                    15
_reflns_d_resolution_high              0.497
_reflns_d_resolution_low               2.934
data_UNOFA_s_05


loop_
      _refln_index_h
      _refln_index_k
      _refln_index_l
      _refln_observed_status
      _refln_F_squared_meas
      _refln_F_squared_calc
      _refln_phase_calc
  -4  -5  34 <  -1.176     5.952   0.00 
  -4  -5  35 <    0(17)    0.      0.00 
  -4  -3  35 <   22(14)    5.     180.00
  -4  -2  32 <   17(16)    0.      0.00 
  -3  -6  31 <    3(18)    1.      0.00 
  -3  -5  26 <  -1.041     0.142  180.00
  -3  -5  27 <  -8.631     1.124  180.00
  -3  -5  30 <    6(16)   15.     180.00
  -3  -4  29 <    6(10)   22.      0.00 
  -3  -4  29 <    4(12)   22.      0.00 
  -3  -4  30 <   55(24)   25.      0.00 
  -3  -4  32 <   35(14)   27.      0.00 
  -3  -3  26 <  -3.199     0.126   0.00 
  -3  -3  28 <    7(9)     1.      0.00 
  -3  -3  30 <  -0.629     0.016   0.00 
  -3  -3  31 <  -2.158     0.235  180.00
  -3  -3  32 <  -3.457     7.213  180.00
  -3  -3  36 < -16.622     0.219   0.00 
  -3  -2  26 o   19(9)     0.      0.00 
  -3  -2  28 <    1(9)     2.      0.00 
  -3  -2  29 <  -4.810     3.012   0.00 
  -3  -2  31 <   19(11)    6.     180.00
  -3  -2  33 <   25(19)   17.     180.00
  -3  -2  36 <  -0.253     0.828  180.00
  -2  -6  32 <    1(15)    0.     180.00
  -2  -5  25 <   42(16)   18.      0.00 
  -2  -5  26 <   13(12)    7.     180.00
  -2  -5  30 <   18(14)   12.      0.00 
  -2  -5  33 <    2(16)    0.      0.00 
  -2  -4  23 o    4(7)     0.      0.00 
  -2  -4  28 <   22(11)    7.      0.00 
  -2  -4  29 <  -9.366     0.343  180.00
  -2  -4  32 <   11(15)    2.     180.00
  -2  -3  19 o    5(4)     7.      0.00 
  -2  -3  21 o    3(5)    17.     180.00
  -2  -3  22 o   10(8)     3.     180.00
  -2  -3  23 o    0(12)    6.      0.00 
  -2  -3  27 <  -1.752     0.000   0.00 
  -2  -3  34 <   25(16)    0.      0.00 
  -2  -3  34 <   32(27)    0.      0.00 
  -2  -3  36 < -10.013     0.104   0.00 
  -2  -3  37 < -22.166     0.231  180.00
  -2  -2  17 o  -1.200     1.314   0.00 
  -2  -2  21 o   10(4)    10.      0.00 
  -2  -2  23 o    7(5)     0.     180.00
  -2  -2  25 o  -3.147    12.702  180.00
  -2  -2  26 o  -7.820     0.266  180.00
  -2  -2  27 <   13(12)   13.     180.00
  -2  -2  28 <  -2.264     2.312  180.00
  -2  -2  29 <    3(10)    3.      0.00 
  -2  -2  31 <    5(11)    5.      0.00 
  -2  -2  35 <    2(17)   11.     180.00
  -2  -2  36 <   33(16)    1.      0.00 
  -1  -6  34 <    8(19)    2.     180.00
  -1  -5  25 <   27(8)    21.     180.00
  -1  -5  29 <   70(22)    6.      0.00 
  -1  -5  30 <  -1.399     4.359  180.00
  -1  -5  32 <   34(15)    0.     180.00
  -1  -5  35 <   51(19)    0.      0.00 
  -1  -4  20 o    1(6)     9.     180.00
  -1  -4  23 o   42(10)   45.     180.00
  -1  -4  24 o   21(8)    28.     180.00
  -1  -4  26 <   62(13)   40.     180.00
  -1  -4  27 <   25(10)   38.      0.00 
  -1  -4  29 <    4(11)    0.     180.00
  -1  -4  32 <   77(25)    0.     180.00
  -1  -4  34 <  -8.531     0.000   0.00 
  -1  -4  35 <   80(33)    1.     180.00
  -1  -3  15 o   9.5(28)  23.4     0.00 
  -1  -3  16 o   5.5(24)   7.3    180.00
  -1  -3  18 o   86(8)    71.     180.00
  -1  -3  19 o  -6.874     2.096  180.00
  -1  -3  24 o    8(13)    1.     180.00
  -1  -3  26 o    2(9)     6.      0.00 
  -1  -3  30 <    6(13)    2.      0.00 
  -1  -2  10 o   1.7(7)    0.2    180.00
  -1  -2  13 o  16.7(18)  19.1     0.00 
  -1  -2  15 o  15.7(29)  13.3     0.00 
  -1  -2  16 o   29(4)    42.      0.00 
  -1  -2  18 o  -3.957     0.194  180.00
  -1  -2  19 o   22(6)    25.     180.00
  -1  -2  20 o  -5.733     0.619  180.00
  -1  -2  21 o   21(9)     5.      0.00 
  -1  -2  23 o    5(12)    0.     180.00
  -1  -2  25 o    3(7)     1.     180.00
  -1  -2  27 o    4(18)   19.      0.00 
  -1  -1   9 o  46.7(16)  43.8     0.00 
  -1  -1  10 o   1.2(5)    3.2    180.00
  -1  -1  11 o   8.5(10)   8.3    180.00
  -1  -1  12 o   3.0(9)    8.7    180.00
  -1  -1  13 o  21.9(17)  23.7     0.00 
  -1  -1  15 o  28.6(28)  26.5     0.00 
  -1  -1  16 o  15.1(34)  21.6     0.00 
  -1  -1  17 o   76(6)    73.     180.00
  -1  -1  18 o   22(6)    20.      0.00 
  -1  -1  19 o   20(6)    20.      0.00 
  -1  -1  20 o  -5.281     5.552  180.00
  -1  -1  21 o   15(5)    11.     180.00
  -1  -1  22 o   13(6)    18.     180.00
_reflns_number_total                   44
_reflns_limit_h_min                    -4
_reflns_limit_h_max                    -1
_reflns_limit_k_min                    -6
_reflns_limit_k_max                    -1
_reflns_limit_l_min                    9
_reflns_limit_l_max                    37
_reflns_d_resolution_high              0.501
_reflns_d_resolution_low               2.008
data_UNOFA_s_06


loop_
      _refln_index_h
      _refln_index_k
      _refln_index_l
      _refln_observed_status
      _refln_F_squared_meas
      _refln_F_squared_calc
      _refln_phase_calc
  -8  -5  29 <  -8.403      0.000   0.00 
  -8  -5  30 <   21(14)     0.     180.00
  -8  -4  27 <   25(19)     9.     180.00
  -8  -4  31 <   72(29)     0.     180.00
  -8  -3  28 < -13.505      1.733   0.00 
  -7  -6  25 <    3(17)     0.      0.00 
  -7  -6  26 <   65(31)     0.     180.00
  -7  -6  28 <   40(27)     1.      0.00 
  -7  -5  25 <  -0.795      0.616  180.00
  -7  -5  28 <    1(23)     0.      0.00 
  -7  -4  23 <    0(9)      0.     180.00
  -7  -4  31 <    5(17)     0.      0.00 
  -7  -4  32 <  -7.772      0.387   0.00 
  -7  -4  32 <   19(23)     0.      0.00 
  -7  -3  23 <   60(14)    12.      0.00 
  -7  -3  25 <    6(10)    12.      0.00 
  -7  -3  28 <   15(13)     1.     180.00
  -6  -6  27 <    8(13)     3.      0.00 
  -6  -6  30 < -11.904     15.052  180.00
  -6  -6  31 <   33(33)     2.     180.00
  -6  -5  20 <    4(10)    15.      0.00 
  -6  -5  21 <   23(10)    22.      0.00 
  -6  -5  23 <  -1.216      7.381  180.00
  -6  -5  26 < -35.630      1.979  180.00
  -6  -5  27 <    1(13)     7.      0.00 
  -6  -4  20 <    8(6)     18.     180.00
  -6  -4  21 <   15(6)     24.      0.00 
  -6  -4  28 <  -4.165      0.010   0.00 
  -6  -3  20 o    2(5)      1.     180.00
  -6  -3  22 <   30(7)     32.      0.00 
  -6  -3  23 <   20(8)     24.     180.00
  -6  -3  24 <   38(12)    12.      0.00 
  -6  -3  26 <   19(10)     9.      0.00 
  -6  -3  27 <    1(12)    17.     180.00
  -6  -3  28 <   70(21)    25.     180.00
  -6  -3  30 <   64(18)    29.     180.00
  -6  -3  33 <   27(15)     0.     180.00
  -6  -3  35 <   44(16)     1.      0.00 
  -6  -2  20 o   40(8)     34.      0.00 
  -6  -2  21 o   12(9)      9.     180.00
  -5  -6  26 <    1(11)     0.      0.00 
  -5  -6  27 <   16(12)    27.     180.00
  -5  -6  28 <    5(26)    17.     180.00
  -5  -6  29 <   41(20)    25.     180.00
  -5  -6  30 <   47(21)     8.     180.00
  -5  -5  21 <   19(7)      8.      0.00 
  -5  -5  22 <   55(11)    67.     180.00
  -5  -5  23 <    9(8)      9.      0.00 
  -5  -5  27 <    8(12)    11.     180.00
  -5  -5  29 <   10(12)     0.     180.00
  -5  -5  29 <   33(22)     0.     180.00
  -5  -5  30 <   16(13)    16.      0.00 
  -5  -4  20 o    3(8)      4.     180.00
  -5  -4  21 o   18(8)      1.      0.00 
  -5  -4  22 <  -2.892      1.309  180.00
  -5  -4  26 <  -1.028      1.769  180.00
  -5  -3  17 o  15.2(35)   10.5    180.00
  -5  -3  19 o    4(4)     13.      0.00 
  -5  -3  21 o   15(7)     15.      0.00 
  -5  -3  27 <    7(11)     1.     180.00
  -5  -3  28 <  -7.358      5.724   0.00 
  -5  -3  29 <   17(12)     7.     180.00
  -5  -2  18 o   11(5)      4.     180.00
  -5  -2  22 o   17(6)     13.      0.00 
  -5  -2  24 o  -9.523      1.846  180.00
  -5  -2  26 <  -2.625      0.109   0.00 
  -4  -5  22 <    7(12)     3.      0.00 
  -4  -5  23 <   26(16)    13.      0.00 
  -4  -4  17 o   18(7)      6.     180.00
  -4  -4  18 o    2(4)      0.     180.00
  -4  -4  20 o  -0.278      7.719   0.00 
  -4  -4  22 o  -0.023     13.565  180.00
  -4  -4  24 <    3(8)      1.     180.00
  -4  -3  13 o   135(5)    130.    180.00
  -4  -3  14 o  13.1(24)   17.3    180.00
  -4  -3  16 o  11.4(33)   13.7    180.00
  -4  -3  17 o   7.0(31)   10.1     0.00 
  -4  -3  20 o    2(4)      5.      0.00 
  -4  -3  22 o    4(6)      0.      0.00 
  -4  -2  14 o  15.2(18)   32.8    180.00
  -4  -2  15 o   28(4)     21.      0.00 
  -4  -2  17 o   2.1(27)    5.4     0.00 
  -4  -2  18 o   29(5)     14.      0.00 
  -4  -2  19 o  -2.517      0.320  180.00
  -4  -2  20 o  -5.119      0.126   0.00 
  -4  -2  22 o  -0.926      4.026  180.00
  -3  -3  13 o   113(4)    109.    180.00
  -3  -3  14 o  14.4(22)   15.5     0.00 
  -3  -3  15 o   56(5)     50.     180.00
  -3  -3  16 o   24(4)     16.      0.00 
  -3  -2  10 o  29.9(20)   31.0    180.00
  -3  -2  11 o  42.4(23)   46.1    180.00
  -3  -2  12 o  63.6(30)   58.6     0.00 
  -3  -2  13 o   4.4(20)    0.5     0.00 
  -3  -2  15 o  23.5(21)   27.0     0.00 
  -3  -2  16 o   74(4)     81.     180.00
  -3  -2  17 o   4.5(23)    5.8    180.00
  -3  -2  18 o   26(5)     12.      0.00 
  -3  -1  10 o   2.8(8)     1.5     0.00 
  -2  -2   9 o  27.9(17)   26.4    180.00
  -2  -2  10 o   0.2(9)     2.0    180.00
  -2  -2  11 o   0.6(11)    4.5    180.00
  -2  -2  12 o   2.7(10)    2.1     0.00 
  -2  -1   7 o   2.1(7)     2.2     0.00 
  -2  -1   8 o  112.0(32)  113.0   180.00
  -2  -1   9 o  25.3(18)   21.6     0.00 
  -2  -1  10 o  12.6(12)   11.2    180.00
  -2  -1  11 o  18.4(13)   18.5    180.00
  -1  -1   5 o   1.4(6)     0.8    180.00
  -1  -1   6 o   6.5(8)     6.2     0.00 
_reflns_number_total                   52
_reflns_limit_h_min                    -8
_reflns_limit_h_max                    -1
_reflns_limit_k_min                    -6
_reflns_limit_k_max                    -1
_reflns_limit_l_min                    5
_reflns_limit_l_max                    35
_reflns_d_resolution_high              0.498
_reflns_d_resolution_low               3.101
data_UNOFA_s_07


loop_
      _refln_index_h
      _refln_index_k
      _refln_index_l
      _refln_observed_status
      _refln_F_squared_meas
      _refln_F_squared_calc
      _refln_phase_calc
   1  -1   6 o  15.5(8)   13.9    180.00
   1  -1   7 o  72.6(18)  68.6    180.00
   2  -2  11 o  59.4(26)  62.1    180.00
   2  -2  13 o  23.5(21)  22.1     0.00 
   2  -2  14 o   66(4)    60.     180.00
   2  -1   8 o   1.7(7)    5.6     0.00 
   2  -1   9 o   0.7(5)    0.5    180.00
   2  -1  10 o  26.3(19)  23.9     0.00 
   2  -1  11 o  30.0(18)  33.0     0.00 
   2  -1  12 o  19.5(21)  16.8    180.00
   2  -1  13 o  29.6(20)  32.0     0.00 
   2  -1  14 o  82.6(35)  82.0    180.00
   3  -3  17 o   13(6)     5.     180.00
   3  -3  20 o   34(7)    36.      0.00 
   3  -3  21 o   15(6)    11.      0.00 
   3  -2  12 o   64(5)    68.      0.00 
   3  -2  13 o   6.3(20)   9.6    180.00
   3  -2  14 o  18.2(29)  20.5     0.00 
   3  -2  16 o    2(5)     6.     180.00
   3  -2  17 o  -1.231     0.402   0.00 
   3  -2  18 o   11(9)    17.     180.00
   3  -2  19 o   12(4)     8.      0.00 
   3  -2  20 o   33(6)    25.     180.00
   3  -2  21 o   20(5)    12.      0.00 
   3  -1  13 o   43(5)    42.      0.00 
   3  -1  14 o   90(5)    102.    180.00
   3  -1  15 o   15(4)    24.     180.00
   3  -1  16 o  -0.277     5.142  180.00
   3  -1  18 o  -1.247     0.205  180.00
   3  -1  19 o    1(4)    10.      0.00 
   3  -1  20 o    9(8)     0.     180.00
   3  -1  21 o   20(7)    13.     180.00
   3  -1  22 o   49(12)   47.      0.00 
   3  -1  23 o   26(7)    17.     180.00
   4  -4  25 <    9(9)     5.      0.00 
   4  -3  21 o  -4.003     3.944  180.00
   4  -3  22 o    2(8)     0.     180.00
   4  -2  15 o   47(7)    36.     180.00
   4  -2  21 o   32(7)    31.      0.00 
   4  -2  23 o   56(12)   63.      0.00 
   4  -2  26 <   18(16)    9.     180.00
   4  -1  18 o    5(5)     9.     180.00
   4  -1  19 o   30(5)    34.      0.00 
   4  -1  21 o   39(6)    48.      0.00 
   4  -1  22 o    7(7)     0.     180.00
   4  -1  24 <   14(17)    1.     180.00
   4   0  19 <    6(9)     0.      0.00 
   5  -5  29 <  -9.596     0.498   0.00 
   5  -4  22 <   38(20)   35.      0.00 
   5  -4  23 <   12(9)     8.     180.00
   5  -4  27 <    2(13)    7.      0.00 
   5  -4  32 <   30(14)    0.     180.00
   5  -3  19 o   65(15)    5.     180.00
   5  -3  21 <   11(8)     0.      0.00 
   5  -3  22 <  -2.911    18.305   0.00 
   5  -3  23 <   33(13)   27.      0.00 
   5  -3  24 <   38(20)   19.     180.00
   5  -3  26 <   41(14)    0.     180.00
   5  -3  27 <   26(11)    1.      0.00 
   5  -3  29 <  -5.949     0.405  180.00
   5  -3  31 <    6(15)    4.     180.00
   5  -3  32 <    3(15)    4.      0.00 
   5  -2  19 o   18(9)    22.      0.00 
   5  -2  20 o   66(8)    96.      0.00 
   5  -2  23 <    0(9)    14.     180.00
   5  -2  24 <   33(17)   16.     180.00
   5  -2  31 <   23(19)    1.      0.00 
   5  -2  32 <   11(15)    4.      0.00 
   5  -2  33 < -18.994     3.708   0.00 
   5  -1  22 o   67(20)   49.     180.00
   5  -1  24 <   22(8)    10.     180.00
   5  -1  26 <  -1.425     0.010  180.00
   5  -1  28 <   11(11)    0.     180.00
   5  -1  27 <   11(11)    0.     180.00
   5  -1  32 <    3(14)    0.      0.00 
   6  -5  24 <   16(13)   15.     180.00
   6  -5  25 <    2(14)    7.     180.00
   6  -5  26 <    6(13)    1.     180.00
   6  -5  29 <    5(16)    1.     180.00
   6  -4  23 <   19(11)   30.     180.00
   6  -4  24 <   27(20)   15.      0.00 
   6  -4  25 <   11(16)   35.     180.00
   6  -4  26 <  -0.854     5.198   0.00 
   6  -3  23 <   49(11)   20.     180.00
   6  -3  30 <    6(16)    1.     180.00
   6  -2  24 <  -3.997     3.457  180.00
   6  -2  26 <    1(13)    1.      0.00 
   6  -2  27 <   65(30)    5.     180.00
   6  -2  29 < -24.700    10.792   0.00 
   6  -2  30 <  -3.814     3.049   0.00 
   6  -1  30 <  -1.658     0.652  180.00
   7  -5  27 <   15(16)    2.     180.00
   7  -4  28 < -20.468     0.064   0.00 
   7  -2  30 <   39(18)    0.     180.00
_reflns_number_total                   47
_reflns_limit_h_min                    1
_reflns_limit_h_max                    7
_reflns_limit_k_min                    -5
_reflns_limit_k_max                    0
_reflns_limit_l_min                    6
_reflns_limit_l_max                    33
_reflns_d_resolution_high              0.507
_reflns_d_resolution_low               2.587
data_UNOFA_s_08


loop_
      _refln_index_h
      _refln_index_k
      _refln_index_l
      _refln_observed_status
      _refln_F_squared_meas
      _refln_F_squared_calc
      _refln_phase_calc
   0  -5  30 <    5(9)      1.     180.00
   0  -5  34 <   22(18)     0.      0.00 
   0  -5  36 <    5(14)     3.     180.00
   0  -4  24 o  -4.470      7.655   0.00 
   0  -4  25 o   48(11)    44.      0.00 
   0  -4  26 <   40(10)    45.      0.00 
   0  -4  27 <   72(11)    49.      0.00 
   0  -4  29 <    1(9)      6.      0.00 
   0  -4  32 <    8(10)     0.     180.00
   0  -4  34 <   14(13)     2.     180.00
   0  -3  18 o   39(4)     39.     180.00
   0  -3  23 o    3(4)      7.      0.00 
   0  -3  24 o   13(6)     12.      0.00 
   0  -3  25 o   59(11)    34.      0.00 
   0  -3  29 <    1(10)    14.     180.00
   0  -3  31 <   23(12)     3.      0.00 
   0  -2  13 o   8.3(11)   10.9    180.00
   0  -2  14 o  28.5(20)   24.8    180.00
   0  -2  15 o  29.4(26)   24.5     0.00 
   0  -2  16 o   191(5)    194.    180.00
   0  -2  17 o   86(4)     82.      0.00 
   0  -2  18 o   3.9(16)    4.2     0.00 
   0  -2  19 o  12.2(28)    8.7    180.00
   0  -2  20 o   31(4)     34.      0.00 
   0  -2  21 o   17(4)     17.     180.00
   0  -2  24 o   36(7)     31.      0.00 
   0  -2  27 o   41(10)    36.      0.00 
   0  -2  28 <   34(11)    29.     180.00
   0  -2  31 <    1(9)      0.     180.00
   0  -2  34 <   38(16)     0.      0.00 
   0  -1   6 o  10.6(10)    8.8     0.00 
   0  -1   7 o   5.3(12)    2.9    180.00
   0  -1   8 o   7.2(14)    6.9     0.00 
   0  -1   9 o   3.5(9)     4.9    180.00
   0  -1  10 o  127.6(32)  129.2   180.00
   0  -1  11 o   2.0(9)     0.4    180.00
   0  -1  12 o  30.8(16)   32.2    180.00
   0  -1  13 o  17.1(18)   13.7     0.00 
   0  -1  14 o  -0.756      0.451  180.00
   0  -1  15 o  11.8(23)    6.7     0.00 
   0  -1  16 o  10.1(20)    7.6    180.00
   0  -1  17 o  11.9(22)   10.0    180.00
   0  -1  18 o  25.0(27)   27.1     0.00 
   0  -1  21 o  -0.525      6.249  180.00
   1  -5  32 <    3(13)     1.      0.00 
   1  -5  34 <    6(14)     3.     180.00
   1  -5  35 <  -1.412      0.372  180.00
   1  -4  24 o   22(7)     33.      0.00 
   1  -4  25 <    0(7)     12.      0.00 
   1  -4  26 <    9(8)     13.      0.00 
   1  -4  29 < -16.577      1.789   0.00 
   1  -4  31 <   32(14)     1.     180.00
   1  -4  32 <   38(17)     7.     180.00
   1  -4  34 < -11.027      0.152  180.00
   1  -4  35 < -11.352      0.709   0.00 
   1  -4  36 <   36(29)     9.      0.00 
   1  -3  18 o  10.3(33)   12.6     0.00 
   1  -3  20 o   13(6)      9.     180.00
   1  -3  22 o    4(4)      2.      0.00 
   1  -3  23 o  -7.537     20.149   0.00 
   1  -3  25 o   11(9)      1.     180.00
   1  -3  26 <   11(7)     13.     180.00
   1  -3  27 <   16(6)     12.     180.00
   1  -3  30 <    3(10)     1.     180.00
   1  -3  33 <   15(12)     0.     180.00
   1  -3  37 < -11.384      0.005  180.00
   1  -2  12 o   5.0(9)     6.1     0.00 
   1  -2  13 o  28.1(19)   27.2     0.00 
   1  -2  14 o  15.9(21)   16.8     0.00 
   1  -2  15 o  14.9(27)   17.3    180.00
   1  -2  16 o  -0.005      5.535   0.00 
   1  -2  18 o   2.7(21)    6.4    180.00
   1  -2  19 o   13(4)      9.      0.00 
   1  -2  21 o    0(4)      0.      0.00 
   1  -2  23 o    6(4)      2.      0.00 
   1  -2  27 <   11(11)    19.     180.00
   1  -2  29 <   13(19)     0.     180.00
   1  -2  29 <   44(12)     0.     180.00
   1  -2  30 <   49(13)    20.     180.00
   1  -2  33 <   27(25)     0.      0.00 
   1  -2  34 <    2(13)     0.     180.00
   1  -1  12 o   1.4(17)    2.1    180.00
   1  -1  13 o  -0.053      1.523  180.00
   1  -1  14 o  20.4(17)   17.2     0.00 
   1  -1  15 o   2.8(13)    2.6     0.00 
   1  -1  16 o  77.9(31)   78.6    180.00
   1  -1  17 o   1.0(16)    0.1    180.00
   1  -1  18 o  -0.436      0.040  180.00
   1  -1  20 o   19(6)     11.      0.00 
   1  -1  22 o    7(4)      6.     180.00
   1  -1  23 o    3(4)     11.     180.00
   1  -1  24 o   19(4)     19.      0.00 
   1  -1  25 o    5(6)     18.     180.00
   2  -5  30 <    3(12)     1.      0.00 
   2  -5  33 < -13.169      2.634  180.00
   2  -5  34 <    0(14)     0.      0.00 
   2  -4  26 <    3(16)     4.     180.00
   2  -4  27 <    3(9)      1.      0.00 
   2  -4  28 < -15.164      0.732   0.00 
   2  -4  29 <   19(11)     9.     180.00
   2  -4  30 <  -8.234      7.131   0.00 
   2  -4  34 <   42(14)     0.      0.00 
   2  -3  26 <  -3.980      2.226   0.00 
   2  -3  31 <   18(16)     0.     180.00
   2  -3  32 < -11.809      0.013   0.00 
   2  -3  36 <    7(20)     1.     180.00
   2  -2  23 o    4(5)      0.      0.00 
   2  -2  25 o   18(9)     26.      0.00 
   2  -2  26 <  -4.170      8.384  180.00
   2  -2  27 <   33(7)     38.     180.00
   2  -2  28 <   32(9)     18.     180.00
   2  -2  29 <   52(23)    21.     180.00
   2  -2  29 <  -5.920     21.360  180.00
   2  -2  33 <   15(13)    10.     180.00
   2  -2  35 <    6(29)    10.      0.00 
   2  -2  36 <   67(31)     2.      0.00 
   2  -2  37 <   24(23)     9.      0.00 
   2  -1  26 o    2(7)      3.     180.00
   2  -1  27 <   62(11)    45.     180.00
_reflns_number_total                   61
_reflns_limit_h_min                    0
_reflns_limit_h_max                    2
_reflns_limit_k_min                    -5
_reflns_limit_k_max                    -1
_reflns_limit_l_min                    6
_reflns_limit_l_max                    37
_reflns_d_resolution_high              0.499
_reflns_d_resolution_low               2.906
data_UNOFA_s_09


loop_
      _refln_index_h
      _refln_index_k
      _refln_index_l
      _refln_observed_status
      _refln_F_squared_meas
      _refln_F_squared_calc
      _refln_phase_calc
   1   0   1 o  30.4(18)  32.5    180.00
   3  -1   2 o   0.6(4)    0.1    180.00
   3  -1   3 o  72.3(17)  70.1     0.00 
   3  -1   4 o   5.2(6)    5.3     0.00 
   3   0   3 o  60.7(16)  59.5    180.00
   3   0   4 <   0.1(4)    0.0     0.00 
   4  -1   3 o  86.0(26)  86.8     0.00 
   4  -1   4 o   1.2(7)    0.7     0.00 
   4  -1   5 o   9.1(14)  11.6    180.00
   4   0   4 o  82.6(26)  82.0    180.00
   5  -1   3 o   10(4)     9.      0.00 
   5  -1   4 o   64(4)    75.     180.00
   5  -1   5 o  23.4(24)  23.5     0.00 
   5  -1   6 o  -0.006     0.631  180.00
   5   0   5 o   4.6(16)   9.9    180.00
   5   0   7 o  31.0(29)  32.3    180.00
   6  -2   4 o   4.3(30)  11.8     0.00 
   6  -2   5 o   77(7)    78.     180.00
   6  -2   6 o    3(4)     1.      0.00 
   6  -2   7 o   18(4)    20.      0.00 
   6  -2   8 o   4.1(31)  12.1     0.00 
   6  -1   4 o   11(5)     0.      0.00 
   6  -1   5 o   75(7)    65.      0.00 
   6  -1   7 o   114(6)   107.     0.00 
   6  -1   8 o  -0.839     0.003   0.00 
   6   0   4 o    5(4)     2.     180.00
   6   0   6 o  20.6(34)  26.5     0.00 
   6   0   8 o   1.8(24)   1.4    180.00
   7  -2   4 o    6(5)     0.      0.00 
   7  -2   5 o   30(6)    28.      0.00 
   7  -2   6 o   101(9)   126.     0.00 
   7  -2   7 o   30(7)    30.      0.00 
   7  -2   8 o    1(6)     4.      0.00 
   7  -2   9 o    7(5)    11.     180.00
   7  -1   4 o   80(10)   67.      0.00 
   7  -1   5 o    5(8)    21.      0.00 
   7  -1   8 o   89(8)    83.     180.00
   7  -1   9 o   33(8)    34.     180.00
   7   0   5 o   13(9)     1.      0.00 
   7   0   7 o   87(12)   90.     180.00
   8  -2   7 o   11(9)     0.     180.00
   8  -2  10 o  -8.359     0.873  180.00
   8  -1   5 o   40(12)   27.     180.00
   8  -1   6 o   30(15)   23.     180.00
   8   0   8 o   14(6)     1.      0.00 
   8   0   9 <    8(6)     0.      0.00 
   8   0  11 <   11(8)     0.      0.00 
   9  -2   5 o   10(8)     0.     180.00
   9  -2   8 <   11(8)     4.     180.00
   9  -2   9 <   20(14)   31.      0.00 
   9  -2  10 <   11(9)    18.     180.00
   9  -2  11 <  -6.668     3.041  180.00
   9  -1   7 <   49(18)   12.      0.00 
   9  -1   8 <    0(8)     0.     180.00
   9  -1  10 <   23(17)   12.      0.00 
   9   0   7 o  -3.990     5.924  180.00
   9   0   8 <  -7.614     0.000   0.00 
   9   0   9 <   40(13)   46.     180.00
   9   0  11 <    2(9)     9.      0.00 
   9   0  12 <   14(8)     0.      0.00 
   9   0  13 <  -2.365     0.926   0.00 
  10  -3   6 <  -4.859     0.194  180.00
  10  -3   8 < -15.635     0.974   0.00 
  10  -3  10 <   11(11)    1.      0.00 
  10  -3  12 <    0(15)    0.     180.00
  10  -2   9 <   17(10)    1.     180.00
  10  -1   7 <  -3.777     3.304   0.00 
  10  -1   8 <   25(21)   13.     180.00
  10  -1   9 < -14.206     8.576   0.00 
  10  -1  10 <    2(10)    2.      0.00 
  10  -1  11 <    8(10)    1.     180.00
  10  -1  12 <    1(15)    4.      0.00 
  10  -1  14 <    7(11)    1.     180.00
  10   0   7 <  -0.077     0.000   0.00 
  10   0   9 <   34(17)    0.      0.00 
  10   0  11 <   21(15)    0.      0.00 
  11  -4  15 <    4(12)    0.      0.00 
  11  -3   6 <   66(31)    0.      0.00 
  11  -3   7 <    7(15)    1.     180.00
  11  -3   9 <   27(12)    0.      0.00 
  11  -3  14 <   12(12)    1.      0.00 
  11  -2   9 <    9(12)    0.      0.00 
  11  -2  14 <  -3.795     0.100   0.00 
  11  -1  14 <    7(13)    1.     180.00
  11   0   7 < -20.873     0.538  180.00
  11   0   8 <    5(19)    0.      0.00 
  11   0   9 <   26(23)    3.     180.00
  11   0  13 <  -0.136     3.546   0.00 
  12  -4   7 <   34(16)    0.      0.00 
  12  -4  10 < -16.847     0.221   0.00 
  12  -2  11 <   15(18)    1.      0.00 
  12  -1   7 <   10(17)    3.      0.00 
  12  -1   8 <   34(27)    1.     180.00
  12  -1  11 <  -5.781     0.084   0.00 
  12  -1  14 <  -2.731     3.220   0.00 
  12   0   8 < -10.091     0.826   0.00 
  12   0  10 <  -0.437     0.290   0.00 
  12   1  11 <    9(26)    0.      0.00 
_reflns_number_total                   46
_reflns_limit_h_min                    1
_reflns_limit_h_max                    12
_reflns_limit_k_min                    -4
_reflns_limit_k_max                    1
_reflns_limit_l_min                    1
_reflns_limit_l_max                    15
_reflns_d_resolution_high              0.500
_reflns_d_resolution_low               6.151
data_UNOFA_s_10


loop_
      _refln_index_h
      _refln_index_k
      _refln_index_l
      _refln_observed_status
      _refln_F_squared_meas
      _refln_F_squared_calc
      _refln_phase_calc
   2  -1   6 o   9.4(15)  10.5    180.00
   2  -1   7 o   8.9(10)  10.4    180.00
   2   0   4 o  10.3(10)   8.2    180.00
   2   0   5 <   0.5(6)    0.0     0.00 
   3  -1   6 o   5.9(8)    6.9     0.00 
   3  -1   7 o   3.9(12)   4.5     0.00 
   3  -1   8 o  10.4(11)  12.8     0.00 
   3  -1   9 o  29.8(20)  29.7    180.00
   3  -1  10 o   173(4)   172.     0.00 
   4  -2  11 o   113(4)   114.     0.00 
   4  -2  13 o   40(4)    35.     180.00
   4  -2  14 o   2.8(28)   2.3    180.00
   4  -1   9 o   8.0(17)  11.8     0.00 
   4  -1  10 o   1.9(15)   3.7    180.00
   4  -1  11 o   101(4)   96.     180.00
   4  -1  12 o  24.8(29)  25.6    180.00
   4  -1  13 o   35(4)    26.     180.00
   4  -1  14 o  -0.640     0.011   0.00 
   4   0   8 o  12.3(22)   7.3     0.00 
   4   0   9 <  -1.786     0.000   0.00 
   4   0  10 o  24.0(20)  24.0    180.00
   5  -2  10 o   13(4)     7.      0.00 
   5  -2  11 o  13.3(31)  16.3    180.00
   5  -2  12 o  10.2(23)   6.2    180.00
   5  -2  13 o   16(7)     9.     180.00
   5  -2  14 o  -3.476     2.413   0.00 
   5  -2  15 o   9.9(30)  10.9     0.00 
   5  -2  16 o   26(4)    29.     180.00
   5  -2  18 o   30(8)    14.      0.00 
   5  -1  11 o   6.3(26)  12.3    180.00
   5  -1  13 o   3.4(28)   5.6     0.00 
   5  -1  14 o   19(5)    23.      0.00 
   5  -1  15 o  15.6(28)  17.0     0.00 
   5  -1  17 o  -3.041     1.348   0.00 
   5  -1  18 o    8(6)     4.      0.00 
   5   0  11 o   10(4)     3.      0.00 
   5   0  13 o   19(6)     8.      0.00 
   6  -3  16 o   33(11)    5.      0.00 
   6  -3  18 o  -1.919     0.173  180.00
   6  -3  19 <   18(12)   14.      0.00 
   6  -2  14 o    6(5)     2.      0.00 
   6  -2  15 o  -2.354     7.744  180.00
   6  -2  17 o    6(6)     4.     180.00
   6  -2  19 o    8(6)     9.      0.00 
   6  -2  21 <   31(15)    6.     180.00
   6  -1  12 o  -4.170     1.333   0.00 
   6  -1  13 o    2(4)     0.      0.00 
   6  -1  15 o    2(5)     0.     180.00
   6  -1  19 o   11(7)    14.     180.00
   6  -1  20 <   15(9)    27.     180.00
   6   0  16 o    6(8)    24.     180.00
   6   0  17 <    2(5)     0.      0.00 
   7  -3  14 o  -6.137     4.382   0.00 
   7  -3  16 <   48(10)   12.     180.00
   7  -3  17 <    1(12)    9.     180.00
   7  -3  20 <   15(9)     0.     180.00
   7  -3  21 <    2(10)    1.      0.00 
   7  -2  13 o   13(6)     9.     180.00
   7  -2  14 o    4(7)    11.     180.00
   7  -2  17 <   13(9)    26.      0.00 
   7  -2  18 <    1(9)     4.      0.00 
   7  -2  23 < -15.845     4.020   0.00 
   7  -2  23 <    1(10)    4.      0.00 
   7  -1  14 o  -4.465     1.542  180.00
   7  -1  15 o    6(10)    2.      0.00 
   7  -1  17 <  -3.464     4.232   0.00 
   7  -1  20 <   18(15)    4.     180.00
   7  -1  21 <  -4.073     0.047   0.00 
   7  -1  22 <    6(10)    0.      0.00 
   7  -1  23 < -17.627     8.619  180.00
   7  -1  24 <   31(15)    9.      0.00 
   7  -1  25 <   31(26)   21.     180.00
   7   0  14 <   11(8)     0.      0.00 
   7   0  15 o  -5.757     4.147   0.00 
   7   0  18 <   14(8)     0.      0.00 
   8  -4  20 <    8(12)    2.     180.00
   8  -4  23 < -13.268     0.051  180.00
   8  -4  25 <  -4.616     0.550  180.00
   8  -4  26 <  -9.931     0.134   0.00 
   8  -3  16 <    4(10)    7.     180.00
   8  -3  18 <    6(10)    0.     180.00
   8  -3  19 <    7(16)    1.     180.00
   8  -3  23 <    6(13)    0.      0.00 
   8  -3  27 <   48(28)    0.      0.00 
   8  -2  15 <  -1.738     9.544   0.00 
   8  -2  16 <   10(12)   19.      0.00 
   8  -2  17 <    6(13)   22.      0.00 
   8  -2  18 <   29(10)    8.      0.00 
   8  -2  19 <   44(19)    1.     180.00
   8  -2  23 <  -9.545     0.004  180.00
   8  -2  24 <   25(13)    2.     180.00
   8  -1  18 <   23(10)    3.     180.00
   8  -1  21 <  -7.813     0.235   0.00 
   8  -1  22 <   14(13)   11.     180.00
   8  -1  24 <  -4.978     0.000   0.00 
   8  -1  25 <  -2.890     0.270  180.00
   8  -1  26 <    4(21)    2.      0.00 
   8  -1  29 <   10(14)    0.      0.00 
   8   0  16 <    3(9)     1.      0.00 
   9  -4  19 <    1(22)    2.     180.00
   9  -4  20 <    2(14)    7.     180.00
   9  -3  18 <  -2.034     9.413  180.00
   9  -3  20 < -32.322     1.447  180.00
   9  -2  22 <   10(15)    1.     180.00
   9  -2  23 <    1(17)    1.      0.00 
   9  -2  25 < -13.412     0.000   0.00 
   9  -1  17 <   62(15)    0.      0.00 
   9  -1  18 < -20.064     8.211  180.00
   9  -1  22 <  -7.735     1.690   0.00 
   9  -1  26 < -16.097     0.166  180.00
   9   0  18 <  -3.554     0.000   0.00 
   9   0  19 <   42(27)   13.     180.00
   9   0  21 <   46(15)   18.     180.00
  10  -2  22 <    5(16)    0.      0.00 
  10  -1  20 <   69(28)   18.     180.00
  10  -1  22 <   17(16)    2.     180.00
  10  -1  23 <   38(28)    0.      0.00 
  10   0  21 <   33(36)    0.      0.00 
_reflns_number_total                   52
_reflns_limit_h_min                    2
_reflns_limit_h_max                    10
_reflns_limit_k_min                    -4
_reflns_limit_k_max                    0
_reflns_limit_l_min                    4
_reflns_limit_l_max                    29
_reflns_d_resolution_high              0.498
_reflns_d_resolution_low               2.639
data_UNOFA_s_11


loop_
      _refln_index_h
      _refln_index_k
      _refln_index_l
      _refln_observed_status
      _refln_F_squared_meas
      _refln_F_squared_calc
      _refln_phase_calc
   1   0  -1 o  43.6(28)   58.3     0.00 
   2   0  -2 o  194.3(35)  190.4    0.00 
   3  -1  -4 o   0.4(4)     0.6     0.00 
   3   0  -3 o  288.0(35)  284.4    0.00 
   4  -1  -5 o   6.5(10)    9.1    180.00
   4  -1  -4 o  16.8(14)   18.8     0.00 
   4  -1  -3 o  18.1(12)   17.9     0.00 
   4   0  -5 <   2.1(6)     0.0     0.00 
   4   0  -3 <   1.7(7)     0.0     0.00 
   5  -1  -7 o   1.5(20)    6.6     0.00 
   5  -1  -4 o  61.7(25)   63.6     0.00 
   5   0  -7 o   6.0(29)    4.2    180.00
   5   0  -5 o  52.2(26)   52.6     0.00 
   5   0  -4 <   1.4(12)    0.0     0.00 
   6  -1  -8 o  -3.521      6.597   0.00 
   6  -1  -7 o   8.3(33)   12.0     0.00 
   6  -1  -6 o    6(4)      4.      0.00 
   6  -1  -5 o   18(4)     12.      0.00 
   6   0  -8 o   44(6)     36.      0.00 
   7  -2  -9 o   38(5)     48.      0.00 
   7  -2  -8 o    2(5)      5.     180.00
   7  -1 -10 o    3(5)     20.     180.00
   7  -1  -9 o   20(5)     10.      0.00 
   7  -1  -8 o   12(7)      0.      0.00 
   7  -1  -6 o  -6.644      0.666  180.00
   7   0  -9 o    6(4)      2.      0.00 
   7   1  -9 o   14(4)     10.     180.00
   8  -2 -11 o   32(6)     32.     180.00
   8  -2 -10 o   27(12)    18.      0.00 
   8  -2  -9 o   46(9)     64.     180.00
   8  -2  -7 o   24(5)     31.      0.00 
   8  -1 -11 o  -1.963      5.757  180.00
   8  -1 -10 o  -5.530      1.095   0.00 
   8  -1  -9 o   25(5)     33.      0.00 
   8  -1  -7 o    0(5)      4.      0.00 
   8  -1  -6 o  -5.741      1.740  180.00
   8   0 -11 <    5(6)      0.      0.00 
   8   0 -10 o  -2.612      3.926   0.00 
   8   0  -8 o   12(6)     17.      0.00 
   8   1 -11 o   14(10)     6.     180.00
   8   1  -9 o   46(8)     33.      0.00 
   9  -2 -12 <   28(13)    23.     180.00
   9  -2 -11 <   19(7)      0.     180.00
   9  -2  -9 o    5(7)     10.      0.00 
   9  -2  -8 o   51(11)    48.      0.00 
   9  -1 -12 <   12(8)      6.      0.00 
   9  -1 -11 o   36(11)    18.      0.00 
   9  -1 -10 o   61(8)     72.      0.00 
   9  -1  -9 o   11(8)     25.      0.00 
   9  -1  -8 o    8(12)     6.     180.00
   9  -1  -7 o   15(13)    14.     180.00
   9   0 -12 <    4(8)      0.      0.00 
   9   0 -11 o   45(14)    27.      0.00 
   9   0 -10 <    5(7)      0.      0.00 
   9   0  -9 o   29(15)    36.     180.00
   9   0  -7 o   12(7)     27.     180.00
   9   1 -11 o   17(6)     18.     180.00
   9   1 -10 o   55(17)    72.      0.00 
   9   1  -9 o   17(7)     25.     180.00
   9   1  -8 o    9(6)      6.     180.00
   9   1  -7 o   11(6)     14.      0.00 
  10  -2 -10 <  -6.285      6.685   0.00 
  10  -1  -9 <   32(16)    15.     180.00
  10  -1  -8 <   14(9)     35.     180.00
  10   0 -14 <   11(16)     0.      0.00 
  10   0 -12 <  -1.182      0.774   0.00 
  10   0 -11 < -14.247      0.000   0.00 
  10   0 -10 <   31(18)    35.     180.00
  10   0  -9 <    9(8)      0.      0.00 
  10   1 -13 <   15(9)      1.      0.00 
  10   1 -11 <    4(8)      4.      0.00 
  10   1 -10 <  -3.493      0.002   0.00 
  10   1  -9 <   23(19)    15.     180.00
  10   1  -8 <   48(11)    35.      0.00 
  11  -3 -14 <   31(23)     3.     180.00
  11  -3 -12 <    3(11)     2.      0.00 
  11  -3 -11 <    9(10)     0.      0.00 
  11  -3 -10 <   19(13)     4.     180.00
  11  -2 -13 <  -2.480      2.501  180.00
  11  -2 -12 < -12.458      1.301  180.00
  11  -2 -11 <    4(19)     1.     180.00
  11  -2 -10 <   12(10)     5.      0.00 
  11  -2  -8 <  -4.844      0.230   0.00 
  11  -1 -16 <   15(14)     2.     180.00
  11  -1 -12 <  -3.688      0.999   0.00 
  11  -1 -10 <  -5.377      2.434  180.00
  11   0 -12 <  -5.261      0.000   0.00 
  11   0 -11 <  -2.274      1.932   0.00 
  11   1 -14 <   22(11)     4.      0.00 
  11   1 -13 <    1(12)    11.     180.00
  11   1 -12 <   23(10)     1.      0.00 
  11   1  -8 <   39(15)     6.     180.00
  12  -3 -14 <    5(14)     0.      0.00 
  12  -3  -9 < -21.534      1.331   0.00 
  12  -2 -16 <  -6.696      3.029  180.00
  12  -2 -14 <  -5.926      0.069  180.00
  12  -2 -11 <    5(13)     1.      0.00 
  12  -2  -9 <  -6.517      0.000   0.00 
  12  -1 -13 <   36(13)     4.      0.00 
  12  -1  -9 <    7(12)     6.     180.00
  12   0 -17 <    8(16)     0.      0.00 
  12   0 -16 <  -3.045     10.903   0.00 
  12   0 -14 < -14.263      0.068   0.00 
  12   1 -17 <   19(18)     0.     180.00
  12   1 -11 < -12.685      1.479  180.00
  12   1 -10 <   27(15)     0.     180.00
  13  -3 -10 <  -8.411      1.660  180.00
  13  -2 -12 <    6(15)     3.      0.00 
  13  -1 -15 <   42(27)     1.      0.00 
  13  -1 -12 <   11(16)     3.     180.00
  13   0 -13 <  -4.200      1.249   0.00 
  13   0 -12 <   16(26)     0.      0.00 
  13   1 -13 <    3(17)     8.      0.00 
_reflns_number_total                   52
_reflns_limit_h_min                    1
_reflns_limit_h_max                    13
_reflns_limit_k_min                    -3
_reflns_limit_k_max                    1
_reflns_limit_l_min                    -17
_reflns_limit_l_max                    -1
_reflns_d_resolution_high              0.493
_reflns_d_resolution_low               6.520
data_UNOFA_s_12


loop_
      _refln_index_h
      _refln_index_k
      _refln_index_l
      _refln_observed_status
      _refln_F_squared_meas
      _refln_F_squared_calc
      _refln_phase_calc
   2   0   0 o  58.3(31)  60.0    180.00
   3   0  -1 o  11.1(13)  10.0     0.00 
   3   0   1 o  71.0(30)  84.3    180.00
   4  -1  -1 o   7.9(13)   2.1    180.00
   4  -1   2 o   9.6(12)   8.1     0.00 
   4   0   0 o  13.4(21)  11.2     0.00 
   5  -1  -1 o  22.1(24)  19.8     0.00 
   5  -1   0 o  83.6(32)  71.2    180.00
   5  -1   1 o   6.7(22)   7.1    180.00
   5  -1   2 o   3.1(12)   6.6    180.00
   5   0  -1 o  45.2(27)  44.7    180.00
   5   0   1 o  14.2(23)  10.3     0.00 
   6  -1  -2 o   109(4)   106.    180.00
   6  -1  -1 o   9.6(24)  26.1    180.00
   6  -1   1 o   12(4)     7.      0.00 
   6  -1   2 o  37.6(32)  36.6     0.00 
   6   0  -2 o  24.1(24)  23.2    180.00
   6   0  -1 <   6.6(18)   0.0     0.00 
   6   0   0 o  25.7(22)  27.7     0.00 
   6   0   2 o  16.3(27)  14.7     0.00 
   7  -1  -2 o   14(4)    10.      0.00 
   7  -1  -1 o   5.3(29)   3.6     0.00 
   7  -1   0 o  15.9(33)  15.8     0.00 
   7  -1   1 o  -0.344     1.774   0.00 
   7  -1   2 o  26.5(34)  25.8     0.00 
   7  -1   3 o  23.5(29)  32.9     0.00 
   7   0  -2 <   0.5(33)   0.0     0.00 
   7   0  -1 o   83(6)    70.      0.00 
   7   0   1 o   15(4)     9.     180.00
   7   0   3 o   6.5(32)   8.1     0.00 
   8  -2  -2 o   29(10)    2.      0.00 
   8  -2  -1 o    1(5)     6.     180.00
   8  -2   2 o    3(5)     0.      0.00 
   8  -2   3 o   28(6)    25.      0.00 
   8  -2   4 o    4(4)     7.      0.00 
   8  -1  -2 o    8(5)     6.      0.00 
   8  -1   1 o    2(4)     0.     180.00
   8   0   3 <  -4.076     0.000   0.00 
   9  -2  -3 o   30(10)    0.     180.00
   9  -2  -1 o  -6.189     4.882  180.00
   9  -2   0 o   54(16)   47.     180.00
   9  -2   1 o -11.934     8.753  180.00
   9  -2   2 o  -0.402     0.301   0.00 
   9  -2   4 o  -1.562     9.112   0.00 
   9  -1  -1 o  -4.413     0.839  180.00
   9  -1   1 o   21(7)    24.      0.00 
   9   0   1 o   21(10)   22.      0.00 
   9   0   2 <  -4.542     0.000   0.00 
   9   0   3 o    2(10)   10.      0.00 
   9   0   4 <  -1.555     0.000   0.00 
  10  -2  -2 <   23(20)   11.     180.00
  10  -2  -1 <    6(10)    8.     180.00
  10  -2   2 <   10(10)   13.      0.00 
  10  -2   4 <   30(19)    0.      0.00 
  10  -1  -3 <   17(14)    0.     180.00
  10  -1  -1 <   17(10)   26.      0.00 
  10  -1   0 <   29(12)   20.      0.00 
  10  -1   1 <   30(9)    18.      0.00 
  10  -1   2 <   26(14)    2.      0.00 
  10  -1   3 <    8(9)    10.     180.00
  10   0  -1 <    6(8)     0.      0.00 
  11  -2  -3 <   75(28)    5.     180.00
  11  -2  -2 <  -0.259     1.447   0.00 
  11  -2   0 < -11.123    15.303   0.00 
  11  -2   1 <    1(11)    3.      0.00 
  11  -1  -3 <  -0.201     0.030  180.00
  11  -1  -2 <   13(12)    4.      0.00 
  11  -1   0 <  -1.309     1.983   0.00 
  11  -1   3 <  -6.992     0.622   0.00 
  11   0  -3 <    4(12)    2.      0.00 
  11   0   0 <  -6.130     0.000   0.00 
  11   0   3 <   53(20)   13.      0.00 
  11   0   5 <  -5.177     0.084  180.00
  11   1  -1 <    3(12)    1.      0.00 
  11   1   0 <    7(14)    2.      0.00 
  12  -3  -4 <   39(32)    0.      0.00 
  12  -3  -3 <  -0.272     0.359  180.00
  12  -3  -1 <   11(31)    2.      0.00 
  12  -3   0 <    4(14)    0.     180.00
  12  -3   1 <    6(14)    2.     180.00
  12  -2  -4 <    7(15)    4.     180.00
  12  -2  -1 <   15(14)    0.     180.00
  12  -2   1 <  -1.393     7.609   0.00 
  12  -2   4 <    6(14)    3.      0.00 
  12  -1   0 <    4(15)    0.     180.00
  12  -1   1 <    5(15)    9.     180.00
  12  -1   2 <   37(29)   24.      0.00 
  12   0  -3 <   56(27)    0.      0.00 
  12   0  -2 <   16(16)    2.      0.00 
  12   0   0 <   52(17)   35.      0.00 
  12   0   4 <   20(17)   42.     180.00
  12   0   5 <   10(17)    0.      0.00 
  12   0   6 <    1(14)    4.     180.00
  12   1  -4 <  -2.313     1.811   0.00 
  12   1   0 <   25(22)    0.      0.00 
  12   1   1 <    2(16)    9.     180.00
  13  -3   0 <   31(25)    0.      0.00 
  13  -3   3 <   11(25)    1.     180.00
  13  -1  -3 <   17(18)    2.     180.00
  13  -1   1 <   19(16)    1.      0.00 
  13  -1   4 <   23(31)   10.      0.00 
  13  -1   5 <  -1.516     0.603  180.00
  13   0  -5 <   54(26)    0.     180.00
  13   0  -1 <    2(26)    0.      0.00 
  13   0   1 <  -2.333     2.556  180.00
  13   0   6 < -22.764     0.000   0.00 
  13   1   0 <   29(19)    4.     180.00
  13   1   1 <   48(38)    1.     180.00
  13   1   4 < -20.680    10.120   0.00 
_reflns_number_total                   45
_reflns_limit_h_min                    2
_reflns_limit_h_max                    13
_reflns_limit_k_min                    -3
_reflns_limit_k_max                    1
_reflns_limit_l_min                    -5
_reflns_limit_l_max                    6
_reflns_d_resolution_high              0.497
_reflns_d_resolution_low               3.348
data_UNOFA_s_13


loop_
      _refln_index_h
      _refln_index_k
      _refln_index_l
      _refln_observed_status
      _refln_F_squared_meas
      _refln_F_squared_calc
      _refln_phase_calc
  -9  -9   8 <    5(14)    2.      0.00 
  -9  -9   9 <    4(21)    0.      0.00 
  -9  -9  10 < -11.058     0.008  180.00
  -9  -8   7 <  -8.096    14.259   0.00 
  -9  -8   9 <   10(13)   10.     180.00
  -8 -10   5 <   44(19)    3.      0.00 
  -8 -10   8 <   18(14)    0.      0.00 
  -8 -10   9 <  -1.673     0.029   0.00 
  -8 -10  10 <   32(22)    1.     180.00
  -8  -9   5 < -12.656     4.305   0.00 
  -8  -9   7 <   13(12)    0.     180.00
  -8  -9   8 <  -1.241     0.005   0.00 
  -8  -9  12 <  -0.998     1.662   0.00 
  -8  -8   5 <  -1.544     3.916   0.00 
  -8  -8   6 <   10(9)     0.     180.00
  -8  -8   8 <   21(16)   16.     180.00
  -8  -8  10 <   10(12)    1.     180.00
  -8  -7   5 <   10(8)     1.     180.00
  -8  -7  10 <   117(19)  89.      0.00 
  -8  -7  11 <    9(12)    8.     180.00
  -8  -7  12 <  -5.500     2.316   0.00 
  -7 -11   6 <   10(15)    0.      0.00 
  -7 -11   7 <    7(22)    0.      0.00 
  -7 -10   6 <    1(13)    0.      0.00 
  -7 -10   8 <    7(15)    3.     180.00
  -7 -10  13 <    7(19)    0.      0.00 
  -7  -9   6 <   11(11)    1.     180.00
  -7  -9  10 <    6(13)   16.     180.00
  -7  -9  11 <    4(14)    4.      0.00 
  -7  -9  12 <   44(20)    0.      0.00 
  -7  -8   6 <    0(9)     1.     180.00
  -7  -8   9 <   29(22)   11.      0.00 
  -7  -7   6 <   15(11)    3.      0.00 
  -7  -7   9 <   32(12)    4.      0.00 
  -7  -6   8 o    1(7)     0.      0.00 
  -7  -6   9 o    1(8)     0.      0.00 
  -6 -11  10 <    4(17)    1.      0.00 
  -6 -10   4 <   22(18)    0.      0.00 
  -6 -10   7 <    5(13)    1.     180.00
  -6  -9   5 <  -6.838     0.115   0.00 
  -6  -9   8 <   14(18)    9.      0.00 
  -6  -9  11 < -18.312     1.931   0.00 
  -6  -8   4 <  -0.097     6.178   0.00 
  -6  -8   5 <    4(12)    4.     180.00
  -6  -8   8 <  -2.008    12.018  180.00
  -6  -8   9 <  -8.312     8.861  180.00
  -6  -8  10 <   10(11)   12.     180.00
  -6  -7   4 o   120(11)  126.    180.00
  -6  -7   5 o    4(7)     1.      0.00 
  -6  -7   7 o    5(7)     4.      0.00 
  -6  -7   8 o    6(7)     4.      0.00 
  -6  -6   4 o  -1.587     1.904   0.00 
  -6  -6   5 o    4(5)    10.     180.00
  -6  -6   7 o   37(12)   15.     180.00
  -6  -6   8 o    6(7)     1.     180.00
  -6  -6   9 o  -9.855     1.074   0.00 
  -5 -10   6 <   10(9)     1.     180.00
  -5  -9   5 <    1(8)     0.     180.00
  -5  -9   6 <   27(19)    0.      0.00 
  -5  -9   7 <    2(16)    2.      0.00 
  -5  -9   8 <   31(10)   17.     180.00
  -5  -8   3 o   47(13)   42.     180.00
  -5  -8   4 o   24(12)   10.     180.00
  -5  -8   5 o   34(15)   10.     180.00
  -5  -8   6 o    4(8)    29.     180.00
  -5  -8   7 <    3(8)     0.      0.00 
  -5  -8   8 <   29(17)   23.     180.00
  -5  -8   9 <   14(10)   29.     180.00
  -5  -7   3 o   19(6)    31.     180.00
  -5  -7   4 o -15.863     2.515   0.00 
  -5  -7   6 o    5(7)    15.     180.00
  -5  -7   9 o   23(6)     6.      0.00 
  -5  -6   7 o   25(8)    27.     180.00
  -5  -5   5 o   18(6)     8.     180.00
  -4  -8   6 o  -1.236    16.397  180.00
  -4  -8   7 o    1(7)    11.      0.00 
  -4  -7   2 o  -3.438     0.559  180.00
  -4  -7   4 o    9(7)    13.      0.00 
  -4  -7   5 o  -0.583     0.332  180.00
  -4  -6   3 o   33(7)    25.     180.00
  -4  -6   4 o   16(8)    11.     180.00
  -4  -6   5 o  -1.716     0.725  180.00
  -4  -6   7 o   13(5)    35.      0.00 
  -4  -5   3 o   7.5(22)   7.2    180.00
  -4  -5   5 o   0.4(28)   0.0    180.00
  -4  -5   6 o  13.6(31)  29.8     0.00 
  -4  -5   7 o   50(9)    34.      0.00 
  -4  -4   3 o   69(4)    75.     180.00
  -4  -4   4 o   5.5(26)   5.4     0.00 
  -4  -4   5 o   83(4)    97.      0.00 
  -4  -4   6 o  19.4(33)  19.1    180.00
  -3  -5   2 o  10.4(30)   9.3     0.00 
  -3  -5   3 o   55(5)    50.      0.00 
  -3  -5   4 o   199(7)   191.     0.00 
  -3  -4   3 o   4.4(19)   0.7    180.00
  -3  -4   4 o  53.4(32)  60.7     0.00 
  -3  -4   5 o  36.5(33)  35.0    180.00
  -3  -3   2 o  20.0(12)  18.6     0.00 
  -3  -3   3 o  80.1(22)  82.3    180.00
  -3  -3   4 o   1.2(8)    2.0     0.00 
  -2  -4   3 o   9.1(14)   9.4    180.00
  -2  -3   2 o  14.8(11)  14.8    180.00
  -2  -3   3 o  82.1(20)  82.8     0.00 
  -2  -2   2 o  17.9(8)   16.5     0.00 
  -2  -2   3 o  14.6(8)   15.0     0.00 
  -1  -1   1 o   136(4)   117.    180.00
_reflns_number_total                   53
_reflns_limit_h_min                    -9
_reflns_limit_h_max                    -1
_reflns_limit_k_min                    -11
_reflns_limit_k_max                    -1
_reflns_limit_l_min                    1
_reflns_limit_l_max                    13
_reflns_d_resolution_high              0.511
_reflns_d_resolution_low               4.683
data_UNOFA_s_14


loop_
      _refln_index_h
      _refln_index_k
      _refln_index_l
      _refln_observed_status
      _refln_F_squared_meas
      _refln_F_squared_calc
      _refln_phase_calc
 -10  -9  -5 < -11.064      0.059  180.00
 -10  -8  -8 <   42(18)     1.     180.00
  -9  -9  -7 < -10.873      2.847   0.00 
  -9  -9  -3 <   11(20)     0.     180.00
  -9  -9  -1 <   12(28)     0.     180.00
  -9  -9   1 <   59(34)     0.     180.00
  -9  -8  -6 <    4(17)     0.      0.00 
  -9  -8  -4 < -34.828      2.132   0.00 
  -9  -8  -2 <   25(16)     0.      0.00 
  -8 -10  -8 < -25.529      7.076   0.00 
  -8 -10  -6 <   32(27)    18.      0.00 
  -8 -10  -1 <   31(21)     4.     180.00
  -8  -9  -9 <   23(22)     2.      0.00 
  -8  -9  -7 < -19.443      0.274  180.00
  -8  -9  -6 <   36(17)    13.     180.00
  -8  -9  -5 < -24.614      0.539   0.00 
  -8  -9  -2 <    3(18)     1.     180.00
  -8  -9  -1 < -22.036      1.977  180.00
  -8  -9   0 < -24.961      1.159   0.00 
  -8  -8  -7 <    6(15)     1.      0.00 
  -8  -8  -3 <   29(26)     0.     180.00
  -8  -8  -1 <   28(25)     3.     180.00
  -8  -7  -7 <  -0.907      0.008  180.00
  -8  -7  -5 < -19.104      3.544   0.00 
  -8  -7  -4 <   17(11)    11.     180.00
  -7 -11  -1 <   16(18)     1.     180.00
  -7 -10  -4 <   10(17)     1.      0.00 
  -7 -10  -2 <   59(39)     8.     180.00
  -7  -9  -7 <    1(16)     3.     180.00
  -7  -9  -5 < -12.367      2.002  180.00
  -7  -9  -4 <   79(26)     3.     180.00
  -7  -9  -3 <   22(31)     0.      0.00 
  -7  -8  -7 <   54(23)    17.      0.00 
  -7  -8  -6 <    4(17)     2.     180.00
  -7  -8  -4 <   16(13)     2.      0.00 
  -7  -8  -3 <   30(13)    18.     180.00
  -7  -8  -2 <    7(13)     0.     180.00
  -7  -8   0 <   23(13)    11.     180.00
  -7  -7  -7 <   121(12)   66.     180.00
  -7  -7  -5 <   39(20)    34.     180.00
  -7  -7  -2 <   59(19)    21.     180.00
  -7  -7  -1 <    3(11)     9.      0.00 
  -7  -7   0 <    1(11)     4.     180.00
  -7  -6  -6 <   28(11)     6.     180.00
  -7  -6  -5 o   46(13)    30.      0.00 
  -7  -6  -4 o   17(14)    13.     180.00
  -7  -6  -3 o    5(8)      7.      0.00 
  -7  -6  -1 o   23(15)    19.     180.00
  -7  -6   0 o  -3.996      5.277  180.00
  -6 -10  -3 <    8(15)     2.     180.00
  -6  -9 -10 <    6(11)     0.     180.00
  -6  -9  -8 <  -6.240      0.000   0.00 
  -6  -9  -6 <    7(13)     1.      0.00 
  -6  -9  -5 <  -0.064      1.072  180.00
  -6  -9  -2 <   20(13)     2.      0.00 
  -6  -9  -1 <  -8.302      6.844  180.00
  -6  -8  -8 <   41(13)     7.     180.00
  -6  -8  -6 <   76(11)    64.     180.00
  -6  -8  -3 <   23(11)    21.     180.00
  -6  -8  -1 <    1(12)    13.     180.00
  -6  -8   0 <    7(12)     4.      0.00 
  -6  -7  -6 o    4(7)      1.      0.00 
  -6  -7  -5 o   57(17)    16.     180.00
  -6  -7  -4 o   151(13)   116.     0.00 
  -6  -7  -3 o   39(13)    24.     180.00
  -6  -7  -1 o   58(18)    25.      0.00 
  -6  -7   0 o   51(16)    34.      0.00 
  -6  -6  -6 o   25(13)    17.      0.00 
  -6  -6  -5 o   32(12)     5.      0.00 
  -6  -6  -3 o    5(13)     1.      0.00 
  -6  -6  -1 o    1(6)      4.      0.00 
  -6  -6   0 o  -4.937      1.941  180.00
  -6  -5  -5 o    6(4)      1.      0.00 
  -6  -5  -2 o   10(7)      8.      0.00 
  -6  -5  -1 o    7(5)     11.      0.00 
  -5  -8  -7 <   24(19)    10.     180.00
  -5  -8  -6 <    4(9)      1.     180.00
  -5  -8  -4 <   18(15)    13.     180.00
  -5  -8  -1 o   16(9)     10.      0.00 
  -5  -7  -5 o   13(6)     14.      0.00 
  -5  -7  -3 o  -7.508      0.592   0.00 
  -5  -7  -1 o    4(7)      1.      0.00 
  -5  -6  -1 o    6(4)      0.      0.00 
  -5  -5  -4 o   11(4)      1.     180.00
  -5  -5  -3 o    5(4)     21.     180.00
  -5  -5  -2 o    9(4)     20.      0.00 
  -5  -5  -1 o   1.9(33)    0.6     0.00 
  -5  -4  -4 o   72(5)     58.      0.00 
  -4  -6  -6 o    3(5)      2.      0.00 
  -4  -6  -5 o   15(5)      5.     180.00
  -4  -6  -4 o    0(4)      3.      0.00 
  -4  -6  -3 o    3(4)      0.      0.00 
  -4  -6  -1 o   34(7)     14.      0.00 
  -4  -5  -5 o   6.2(24)    3.0     0.00 
  -4  -5  -4 o   19(5)     11.     180.00
  -4  -5  -3 o   6.2(23)    1.6     0.00 
  -4  -5  -2 o   19(5)      8.     180.00
  -4  -4  -4 o   7.0(26)    5.7    180.00
  -4  -4  -3 o  55.7(35)   49.1    180.00
  -4  -4  -2 o  46.0(33)   42.4     0.00 
  -4  -4  -1 o  13.3(28)   13.4    180.00
  -3  -5  -3 o   30(4)     12.      0.00 
  -3  -5  -2 o  14.4(35)    9.5    180.00
  -3  -5  -1 o  10.1(19)   15.7    180.00
  -3  -4  -4 o   9.3(25)    9.1    180.00
  -3  -4  -3 o  11.9(22)    5.9     0.00 
  -3  -4  -1 o   3.4(16)    6.1     0.00 
  -3  -3  -3 o   7.8(15)    4.9    180.00
  -3  -3  -2 o  -0.276      0.143   0.00 
  -3  -3  -1 o  78.7(30)   59.1     0.00 
  -3  -3   0 o   3.4(13)    2.5    180.00
  -2  -3  -3 o  43.2(23)   43.5     0.00 
  -2  -3  -2 o  114.3(31)  117.2    0.00 
  -2  -3  -1 o   189(4)    186.    180.00
  -2  -2  -2 o  82.6(30)   101.5   180.00
  -2  -2  -1 o   1.3(8)     2.3     0.00 
  -2  -2   0 o  28.4(16)   24.0    180.00
  -1  -1  -1 o   35(5)     102.    180.00
  -1  -1   0 o   2.1(9)     1.2    180.00
_reflns_number_total                   60
_reflns_limit_h_min                    -10
_reflns_limit_h_max                    -1
_reflns_limit_k_min                    -11
_reflns_limit_k_max                    -1
_reflns_limit_l_min                    -10
_reflns_limit_l_max                    1
_reflns_d_resolution_high              0.490
_reflns_d_resolution_low               4.748
data_UNOFA_s_15


loop_
      _refln_index_h
      _refln_index_k
      _refln_index_l
      _refln_observed_status
      _refln_F_squared_meas
      _refln_F_squared_calc
      _refln_phase_calc
  -4  -9  25 <   16(24)    0.     180.00
  -4  -9  26 <  -2.246     0.289  180.00
  -4  -8  28 <    1(25)    0.     180.00
  -3 -11  20 <    6(20)    4.      0.00 
  -3 -10  22 <   12(19)    4.     180.00
  -3  -9  20 <   30(25)    1.      0.00 
  -3  -9  22 <   18(18)    0.     180.00
  -3  -9  25 < -17.788     0.289  180.00
  -3  -9  25 <    2(19)    0.     180.00
  -3  -9  27 < -14.095     2.653  180.00
  -3  -8  20 <   26(26)    1.      0.00 
  -3  -8  21 <    8(13)    1.     180.00
  -3  -8  22 < -11.698     3.268  180.00
  -3  -8  23 <   52(28)    0.     180.00
  -3  -8  28 <    2(19)    0.      0.00 
  -3  -7  20 <    7(11)    7.     180.00
  -3  -6  20 o   19(15)    1.     180.00
  -2 -11  20 <  -7.753     1.094  180.00
  -2 -10  18 <   21(18)    4.     180.00
  -2 -10  19 <  -9.402     1.057   0.00 
  -2 -10  22 <  -0.036     7.712   0.00 
  -2  -9  15 <   112(22)  35.     180.00
  -2  -9  17 <   26(22)    5.      0.00 
  -2  -9  18 <   22(29)    0.     180.00
  -2  -9  20 <   16(15)    1.      0.00 
  -2  -9  23 <   39(25)    5.      0.00 
  -2  -8  14 o   15(14)   20.     180.00
  -2  -8  19 <  -1.353     1.797  180.00
  -2  -8  21 <  -9.726     0.874  180.00
  -2  -8  23 <    4(15)    2.      0.00 
  -2  -8  28 <   40(21)    0.      0.00 
  -2  -8  30 <   21(26)    0.     180.00
  -2  -8  31 < -11.151     0.322  180.00
  -2  -7  14 o    8(8)     7.     180.00
  -2  -7  15 o   10(8)     0.     180.00
  -2  -7  16 o    3(10)   10.      0.00 
  -2  -7  18 o    3(14)    1.     180.00
  -2  -7  19 <  -3.088     0.363  180.00
  -2  -7  20 <    3(11)    1.     180.00
  -2  -7  21 <   10(12)   10.      0.00 
  -2  -7  22 <   39(23)   17.      0.00 
  -2  -7  23 <   33(26)   33.      0.00 
  -2  -7  24 <    5(14)    3.     180.00
  -2  -7  27 <  -8.840     2.109  180.00
  -2  -7  28 <   14(38)    1.      0.00 
  -2  -6  14 o    1(6)    13.     180.00
  -2  -6  15 o   29(7)    57.      0.00 
  -2  -6  17 o   42(13)   32.      0.00 
  -2  -6  18 o   18(11)    1.      0.00 
  -2  -6  20 o   30(12)   38.      0.00 
  -2  -6  21 o  -1.152     1.766   0.00 
  -2  -6  22 <    5(10)    1.     180.00
  -2  -6  24 <  -1.994    17.890  180.00
  -2  -5  13 o   154(10)  124.     0.00 
  -2  -5  14 o  -5.207     5.596   0.00 
  -2  -5  15 o   84(9)    73.      0.00 
  -2  -5  17 o   78(11)   62.     180.00
  -2  -5  18 o   34(9)    37.      0.00 
  -2  -5  19 o   71(17)   42.     180.00
  -1 -11  19 <   91(29)   13.     180.00
  -1 -11  22 <   12(27)    1.     180.00
  -1 -10  19 <    9(16)    5.      0.00 
  -1 -10  20 <   33(18)   16.     180.00
  -1 -10  21 <   54(35)   38.      0.00 
  -1 -10  25 <  -9.905     1.214  180.00
  -1  -9  16 <   29(26)   20.      0.00 
  -1  -9  17 <    6(12)    6.      0.00 
  -1  -9  22 < -29.227     0.382  180.00
  -1  -9  23 <   58(40)   12.     180.00
  -1  -9  24 <   19(23)   15.     180.00
  -1  -9  25 <   16(22)   12.     180.00
  -1  -9  26 <   195(48)   1.     180.00
  -1  -9  27 <   37(28)    0.      0.00 
  -1  -8  17 <   19(23)    0.     180.00
  -1  -8  18 <   14(12)    6.     180.00
  -1  -8  20 <    0(14)    0.      0.00 
  -1  -7  14 o    7(8)     3.     180.00
  -1  -6  11 o   47(8)    38.     180.00
  -1  -6  12 o    5(5)     2.      0.00 
  -1  -6  13 o   24(7)    17.     180.00
  -1  -6  14 o   38(11)   28.      0.00 
  -1  -6  16 o   24(10)    0.     180.00
  -1  -6  17 o    8(8)     2.      0.00 
  -1  -6  18 o  -2.181     3.432  180.00
  -1  -6  19 o   13(11)   51.      0.00 
  -1  -5   9 o   17(4)     7.     180.00
  -1  -5  10 o   22(4)    16.     180.00
  -1  -5  12 o    9(9)    17.      0.00 
  -1  -5  13 o   39(6)    29.     180.00
  -1  -5  15 o   86(10)   63.      0.00 
  -1  -5  16 o   141(9)   158.    180.00
  -1  -5  17 o   78(12)   95.      0.00 
  -1  -4   7 o  -0.706     0.160   0.00 
  -1  -4   8 o   3.3(11)   2.5    180.00
  -1  -4   9 o   2.4(13)   4.2     0.00 
  -1  -4  10 o   5.2(13)   6.4    180.00
  -1  -4  11 o   7.5(31)   8.0    180.00
  -1  -4  12 o  15.7(33)  39.0    180.00
  -1  -4  15 o   55(7)    67.      0.00 
  -1  -3   7 o   7.9(15)   2.8    180.00
  -1  -3   8 o  23.1(16)  20.4     0.00 
  -1  -3   9 o  79.6(28)  68.2     0.00 
  -1  -3  10 o  25.7(19)  39.6    180.00
  -1  -3  11 o  37.2(27)  40.2     0.00 
  -1  -3  12 o   4.7(16)   0.2     0.00 
   0  -7  13 o   65(11)    2.     180.00
   0  -5   9 o   86(7)    86.     180.00
   0  -4   7 o   3.5(28)   2.8    180.00
_reflns_number_total                   50
_reflns_limit_h_min                    -4
_reflns_limit_h_max                    0
_reflns_limit_k_min                    -11
_reflns_limit_k_max                    -3
_reflns_limit_l_min                    7
_reflns_limit_l_max                    31
_reflns_d_resolution_high              0.501
_reflns_d_resolution_low               1.710
data_UNOFA_s_16


loop_
      _refln_index_h
      _refln_index_k
      _refln_index_l
      _refln_observed_status
      _refln_F_squared_meas
      _refln_F_squared_calc
      _refln_phase_calc
  -8  -9  18 <  -2.355     8.735   0.00 
  -8  -8  17 <   53(24)   16.      0.00 
  -8  -8  19 <   44(23)    6.     180.00
  -7 -10  15 <   16(15)    0.     180.00
  -7  -9  14 <   36(14)   17.      0.00 
  -7  -9  16 <   82(24)   12.      0.00 
  -7  -9  17 <    5(16)    6.      0.00 
  -7  -9  19 <   12(23)    0.     180.00
  -7  -8  15 <   21(10)   20.      0.00 
  -7  -8  19 <  -1.545     1.040  180.00
  -7  -8  20 <   40(15)   16.     180.00
  -7  -7  16 <   31(15)    1.     180.00
  -6 -11  14 <  -0.534     2.833   0.00 
  -6 -11  15 <   52(25)    1.      0.00 
  -6 -10  12 <   32(27)    0.      0.00 
  -6 -10  15 <    6(17)    1.      0.00 
  -6 -10  18 <  -9.192     0.001   0.00 
  -6  -9  10 <   11(10)    0.      0.00 
  -6  -9  12 <   80(15)   40.     180.00
  -6  -9  16 < -10.487     6.920   0.00 
  -6  -9  20 <   21(16)   15.      0.00 
  -6  -9  21 <   68(30)   22.     180.00
  -6  -9  24 <  -5.821     9.454  180.00
  -6  -9  25 <   10(18)    9.      0.00 
  -6  -8  19 <   29(14)    5.     180.00
  -6  -8  22 <   51(23)   30.     180.00
  -6  -8  23 <   11(18)   23.      0.00 
  -6  -7  12 <   32(13)   10.      0.00 
  -6  -7  16 <   17(10)    0.      0.00 
  -5 -11  16 <   10(17)    3.     180.00
  -5 -10  15 <  -4.998     0.100   0.00 
  -5 -10  17 <    0(14)    1.      0.00 
  -5 -10  19 <  -8.357     1.466   0.00 
  -5 -10  20 <    4(31)    2.     180.00
  -5  -9  10 <  -2.732    15.457  180.00
  -5  -9  11 <   29(11)   10.     180.00
  -5  -9  14 <  -6.247     0.010  180.00
  -5  -9  15 <   36(28)    3.      0.00 
  -5  -8   9 <   23(17)   29.     180.00
  -5  -8  10 <   27(14)   13.      0.00 
  -5  -8  11 <   11(9)    20.      0.00 
  -5  -8  12 <   39(12)   28.      0.00 
  -5  -8  13 <   10(10)    9.      0.00 
  -5  -8  16 <  -6.957     0.620   0.00 
  -5  -7   9 o   27(10)    6.      0.00 
  -5  -7  10 o    6(6)    11.      0.00 
  -5  -7  12 o  -2.901     4.776  180.00
  -5  -7  19 <   23(10)    2.     180.00
  -5  -7  21 <   47(15)    2.      0.00 
  -5  -6  10 o   14(7)    10.      0.00 
  -5  -6  14 o    2(6)     2.      0.00 
  -5  -6  15 o    5(7)     1.     180.00
  -5  -5  11 o    8(5)     4.      0.00 
  -4 -11  16 <   16(15)    1.     180.00
  -4 -10  15 <  -1.695     0.848  180.00
  -4  -9  12 <    9(10)    1.      0.00 
  -4  -9  13 <  -9.319     4.633   0.00 
  -4  -9  17 <   19(12)    0.     180.00
  -4  -8  11 o  -2.493     2.839   0.00 
  -4  -8  15 <    5(12)    9.     180.00
  -4  -8  17 <    3(12)   19.     180.00
  -4  -7   8 o    6(4)     6.      0.00 
  -4  -7  11 o    0(6)     0.      0.00 
  -4  -7  12 o   24(11)    8.     180.00
  -4  -7  14 o  -1.438     9.931   0.00 
  -4  -6   7 o   41(7)    35.      0.00 
  -4  -6  10 o   20(5)    23.      0.00 
  -4  -6  11 o   29(7)    13.      0.00 
  -4  -6  12 o   16(8)    24.      0.00 
  -4  -6  15 o   10(8)     3.     180.00
  -4  -6  16 o    4(7)     5.     180.00
  -4  -5   8 o   2.2(22)   1.3    180.00
  -4  -5  10 o  12.3(29)   8.9     0.00 
  -4  -5  11 o   2.7(31)   2.4    180.00
  -4  -5  13 o   4.6(34)   8.8     0.00 
  -4  -5  14 o   21(7)    21.     180.00
  -4  -4   9 o  -2.951     0.028   0.00 
  -3  -7   9 o   10(7)     4.     180.00
  -3  -7  11 o   35(11)   21.      0.00 
  -3  -6   8 o   14(6)    11.      0.00 
  -3  -6   9 o   52(8)    48.      0.00 
  -3  -6  10 o    4(6)     6.      0.00 
  -3  -6  11 o   38(5)    52.      0.00 
  -3  -6  12 o   13(4)    16.     180.00
  -3  -6  13 o   50(6)    56.     180.00
  -3  -5   6 o    8(4)     0.      0.00 
  -3  -5   8 o   107(5)   111.    180.00
  -3  -5  11 o   31(5)    35.     180.00
  -3  -5  12 o   73(7)    63.     180.00
  -3  -5  13 o   71(7)    49.     180.00
  -3  -4   6 o   4.0(19)   2.8    180.00
  -3  -4   7 o   5.8(22)   5.1     0.00 
  -3  -4   8 o  25.7(31)  26.3    180.00
  -3  -4   9 o   7.7(33)   5.7     0.00 
  -3  -4  10 o   12(4)     9.      0.00 
  -3  -3   7 o  13.4(19)  11.9     0.00 
  -2  -5   7 o   107(4)   102.    180.00
  -2  -5   8 o   7.0(30)   1.5    180.00
  -2  -4   5 o   5.7(15)   5.1     0.00 
  -2  -4   6 o   0.5(11)   0.3     0.00 
  -2  -4   8 o  18.4(19)  16.4    180.00
  -2  -3   4 o   1.1(8)    3.0    180.00
  -2  -3   5 o   4.8(15)   3.9    180.00
  -2  -3   6 o  22.9(19)  24.5    180.00
  -2  -3   7 o  25.9(16)  27.3    180.00
  -2  -3   8 o   2.3(8)    2.4    180.00
  -1  -2   4 o   0.1(5)    0.7     0.00 
_reflns_number_total                   54
_reflns_limit_h_min                    -8
_reflns_limit_h_max                    -1
_reflns_limit_k_min                    -11
_reflns_limit_k_max                    -2
_reflns_limit_l_min                    4
_reflns_limit_l_max                    25
_reflns_d_resolution_high              0.497
_reflns_d_resolution_low               2.603
data_UNOFA_s_17


loop_
      _refln_index_h
      _refln_index_k
      _refln_index_l
      _refln_observed_status
      _refln_F_squared_meas
      _refln_F_squared_calc
      _refln_phase_calc
   1  -2   4 o  30.1(11)   29.7     0.00 
   1  -2   5 o  13.7(10)   12.9    180.00
   1  -1   3 o  188.4(30)  180.6   180.00
   1  -1   4 o  18.8(9)    16.9     0.00 
   2  -4   7 o  32.4(28)   39.0    180.00
   2  -4   8 o  15.0(28)   19.5    180.00
   2  -4   9 o   173(5)    180.    180.00
   2  -4  10 o  10.9(20)   11.0     0.00 
   2  -3   5 o   0.3(8)     3.4    180.00
   2  -3   6 o  27.1(16)   30.1    180.00
   2  -3   7 o   0.4(9)     2.0    180.00
   2  -3   8 o   1.8(15)    0.1     0.00 
   2  -3   9 o  42.2(21)   44.2     0.00 
   2  -3  10 o  84.7(31)   88.2     0.00 
   2  -3  11 o  31.2(28)   32.1     0.00 
   2  -2   6 o  53.2(16)   53.2     0.00 
   2  -2   7 o  56.3(19)   55.6    180.00
   2  -2   8 o   6.4(10)    6.6     0.00 
   3  -7  13 o   167(16)   120.     0.00 
   3  -6  10 o  -1.754      4.249   0.00 
   3  -6  11 o   15(6)     13.      0.00 
   3  -6  12 o    3(5)     12.      0.00 
   3  -5   7 o   12(5)      5.     180.00
   3  -5   8 o   5.2(28)    3.5    180.00
   3  -5   9 o   9.4(25)   15.7     0.00 
   3  -5  10 o   22(5)      8.     180.00
   3  -5  11 o   25(8)     17.      0.00 
   3  -5  13 o    5(4)      2.     180.00
   3  -5  14 o    0(4)      3.     180.00
   3  -5  16 o   22(5)     14.      0.00 
   3  -5  17 o    3(5)      0.      0.00 
   3  -4   8 o    6(5)     10.      0.00 
   3  -4   9 o   22(5)     25.      0.00 
   3  -4  10 o  26.4(33)   38.2     0.00 
   3  -4  12 o   8.8(31)    8.1     0.00 
   3  -4  15 o  -0.534      1.226  180.00
   3  -3   9 o   78(5)     75.      0.00 
   3  -3  10 o  15.8(25)   26.3    180.00
   3  -3  11 o   2.3(17)    4.8     0.00 
   3  -3  12 o   72(5)     82.     180.00
   4  -8  14 <  -0.569      0.687   0.00 
   4  -8  15 <  -7.671      4.908   0.00 
   4  -8  17 <    1(11)    12.      0.00 
   4  -8  20 <   41(12)    44.     180.00
   4  -7  12 o  -2.933      2.357  180.00
   4  -7  13 o  -0.691      4.015   0.00 
   4  -7  14 <   79(13)    74.     180.00
   4  -7  16 <  -0.488     12.128  180.00
   4  -7  17 <  -9.072     12.026  180.00
   4  -7  18 < -14.043     10.353  180.00
   4  -7  19 <   40(14)    11.     180.00
   4  -7  21 <    9(11)     0.     180.00
   4  -7  22 <   97(25)    47.      0.00 
   4  -6  14 o -13.327      0.032   0.00 
   4  -6  16 o   19(11)     7.      0.00 
   4  -6  19 <  -5.122      2.846  180.00
   4  -6  20 <    8(9)      6.      0.00 
   4  -6  22 <   16(9)      5.      0.00 
   4  -5  11 o   12(6)     24.     180.00
   4  -5  13 o   20(8)      1.      0.00 
   4  -5  14 o   10(9)     17.     180.00
   4  -5  15 o   59(13)    33.      0.00 
   4  -4  12 o -17.136      0.167   0.00 
   4  -4  13 o   21(9)     14.      0.00 
   4  -4  14 o  -4.454      1.720  180.00
   4  -4  16 o    5(6)      4.     180.00
   5 -10  18 <    0(24)     0.      0.00 
   5 -10  19 <   22(13)     0.     180.00
   5 -10  20 <   16(22)     0.     180.00
   5  -9  17 < -12.723      0.529   0.00 
   5  -9  18 <    5(20)     8.     180.00
   5  -9  23 <   17(16)     1.      0.00 
   5  -8  13 <    4(12)    12.     180.00
   5  -8  17 < -12.479      4.518  180.00
   5  -8  18 <    5(13)    10.     180.00
   5  -8  25 <   18(15)     2.      0.00 
   5  -7  18 <  -2.131      0.124  180.00
   5  -7  19 <   22(19)    25.      0.00 
   5  -7  21 <   44(10)    43.      0.00 
   5  -7  23 <   57(19)     8.     180.00
   5  -7  23 <   58(19)     8.     180.00
   5  -6  14 o   15(12)     8.      0.00 
   5  -6  20 <   16(14)     1.      0.00 
   5  -6  21 <  -3.583      4.599  180.00
   5  -6  22 <    3(11)     1.      0.00 
   5  -6  23 <   11(11)     2.     180.00
   5  -6  24 <   11(12)     1.      0.00 
   5  -5  15 o   15(11)     0.      0.00 
   5  -5  17 o    1(9)      6.      0.00 
   6 -10  14 <   17(28)     7.     180.00
   6 -10  17 < -34.789      0.117  180.00
   6  -9  14 <  -4.233      0.448  180.00
   6  -9  15 <    5(17)     1.     180.00
   6  -9  16 <  -9.936      5.333   0.00 
   6  -9  16 <    5(29)     5.      0.00 
   6  -7  20 <   57(26)     0.      0.00 
   6  -7  21 <   44(20)     1.     180.00
   6  -7  24 < -19.046      0.881  180.00
   6  -7  26 < -12.822      1.491  180.00
   6  -6  19 <  -9.442      0.417  180.00
   7  -9  17 <   23(18)     0.     180.00
   7  -8  20 <   21(20)     0.     180.00
   7  -7  21 < -12.276      0.061   0.00 
   7  -6  25 <  -7.456      2.027   0.00 
_reflns_number_total                   55
_reflns_limit_h_min                    1
_reflns_limit_h_max                    7
_reflns_limit_k_min                    -10
_reflns_limit_k_max                    -1
_reflns_limit_l_min                    3
_reflns_limit_l_max                    26
_reflns_d_resolution_high              0.501
_reflns_d_resolution_low               3.706
data_UNOFA_s_18


loop_
      _refln_index_h
      _refln_index_k
      _refln_index_l
      _refln_observed_status
      _refln_F_squared_meas
      _refln_F_squared_calc
      _refln_phase_calc
   0 -10  26 <  -8.503      7.355  180.00
   0  -9  20 < -12.151      0.137   0.00 
   0  -9  22 <   60(27)    11.     180.00
   0  -9  23 <   23(17)    27.     180.00
   0  -9  25 <   16(14)     4.      0.00 
   0  -9  26 <   17(15)     5.      0.00 
   0  -8  19 <  -2.673     11.930  180.00
   0  -8  20 <    0(9)      2.     180.00
   0  -8  22 <    4(10)     4.     180.00
   0  -8  23 <  -5.392      3.287   0.00 
   0  -8  24 < -12.642      1.583   0.00 
   0  -8  25 <  -6.309      0.146  180.00
   0  -8  26 <   19(13)     7.     180.00
   0  -8  27 <    3(14)     0.     180.00
   0  -8  31 <   22(17)     0.     180.00
   0  -7  17 o    6(6)      8.     180.00
   0  -7  20 <   34(14)    17.     180.00
   0  -7  21 <   42(16)    12.      0.00 
   0  -7  22 <   18(11)    13.     180.00
   0  -7  25 <    4(10)     3.     180.00
   0  -7  26 <    8(12)     1.      0.00 
   0  -7  27 <   42(25)     0.     180.00
   0  -7  30 < -22.471      0.750   0.00 
   0  -6  15 o   6.1(30)    0.0    180.00
   0  -6  16 o   26(9)     26.      0.00 
   0  -6  19 o   17(7)      8.      0.00 
   0  -6  21 o   14(6)      0.      0.00 
   0  -5  11 o   17(4)     14.      0.00 
   0  -5  12 o   3.9(22)    9.3    180.00
   0  -5  13 o   22(4)     14.      0.00 
   0  -5  16 o   25(5)     23.      0.00 
   0  -5  17 o    7(5)      2.      0.00 
   0  -5  18 o   3.4(34)    6.5    180.00
   0  -5  19 o  -6.947      0.225  180.00
   0  -5  20 o    5(5)      1.     180.00
   0  -4   9 o  14.2(15)   13.7     0.00 
   0  -4  10 o  15.8(25)   14.6    180.00
   0  -4  13 o  10.1(33)    4.1     0.00 
   0  -4  14 o  32.5(25)   33.5     0.00 
   0  -4  15 o   37(4)     33.      0.00 
   0  -4  16 o   5.7(18)    3.6    180.00
   0  -4  17 o   26(5)     22.     180.00
   0  -3   7 o  10.6(14)    9.9    180.00
   0  -3   8 o   8.8(14)    6.8     0.00 
   0  -3   9 o   5.1(15)    1.8    180.00
   0  -3  10 o   1.7(10)    2.8     0.00 
   0  -3  11 o   1.3(10)    0.6     0.00 
   0  -3  12 o  17.1(20)   15.9     0.00 
   0  -2   5 o   0.4(5)     0.1    180.00
   0  -2   6 o   6.3(10)    7.0    180.00
   0  -2   7 o  40.2(20)   41.5     0.00 
   0  -2   8 o  47.6(21)   48.1     0.00 
   0  -1   3 o   0.3(4)     1.7     0.00 
   0  -1   4 o  41.2(30)   62.6     0.00 
   1  -9  20 < -13.525      0.732  180.00
   1  -9  22 <  -3.988      0.226   0.00 
   1  -9  25 <    3(15)     1.      0.00 
   1  -8  19 <  -2.041     12.054  180.00
   1  -8  20 <   27(21)    21.      0.00 
   1  -8  21 <   14(10)    15.     180.00
   1  -8  26 <    9(13)     1.     180.00
   1  -8  29 <   11(36)     9.      0.00 
   1  -7  15 o   13(8)     13.      0.00 
   1  -7  16 o    3(6)      0.     180.00
   1  -7  17 o   22(11)    24.     180.00
   1  -7  18 o   12(7)     16.      0.00 
   1  -7  19 <   33(11)    25.     180.00
   1  -7  20 <   13(11)    18.      0.00 
   1  -7  22 <   10(14)     7.     180.00
   1  -7  23 < -14.881      0.006  180.00
   1  -7  25 <   57(13)    43.      0.00 
   1  -7  27 <   85(26)    49.      0.00 
   1  -7  29 <   43(32)    15.     180.00
   1  -6  14 o   18(9)      9.      0.00 
   1  -6  16 o   17(8)      6.      0.00 
   1  -6  20 o    6(11)     5.     180.00
   1  -6  22 < -18.261      0.915   0.00 
   1  -5  10 o   136(4)    136.     0.00 
   1  -5  11 o   81(4)     88.     180.00
   1  -5  12 o   1.1(21)    0.0     0.00 
   1  -5  13 o   0.2(23)    0.5     0.00 
   1  -5  14 o   2.3(29)    1.0    180.00
   1  -5  16 o   6.2(29)   10.5    180.00
   1  -5  17 o   14(5)      9.     180.00
   1  -5  20 o    4(6)      4.      0.00 
   1  -4   9 o  116.9(34)  111.3   180.00
   1  -4  10 o  39.7(23)   39.7    180.00
   1  -4  12 o   83(4)     82.     180.00
   1  -4  13 o   69(4)     63.      0.00 
   1  -4  14 o  12.9(20)   16.5     0.00 
   1  -4  15 o  -0.094      2.230   0.00 
   1  -4  16 o   1.1(26)    1.8     0.00 
   1  -3   9 o  36.7(18)   33.1    180.00
   1  -3  10 o   9.3(15)   11.0    180.00
   1  -3  12 o  58.4(27)   56.7     0.00 
   2 -10  20 <    2(13)     1.      0.00 
   2 -10  23 <   52(21)     0.      0.00 
   2  -9  18 <   49(24)     2.      0.00 
   2  -9  21 <   76(30)     7.     180.00
   2  -9  22 <  -4.152      1.723  180.00
   2  -9  25 <   23(16)     1.     180.00
   2  -8  17 <   10(10)     2.     180.00
   2  -8  18 <    4(17)     9.     180.00
   2  -8  22 <   20(22)     0.     180.00
   2  -8  23 < -27.290      2.902  180.00
   2  -8  26 <   55(21)    29.      0.00 
   2  -8  26 <   42(16)    29.      0.00 
   2  -8  29 <   22(17)     1.      0.00 
   2  -7  19 <   11(9)      0.     180.00
   2  -7  21 <   11(10)     2.     180.00
   2  -7  22 <   26(15)     0.      0.00 
   2  -7  24 <   47(18)    21.      0.00 
   2  -7  26 <  -6.204      2.651   0.00 
   2  -7  28 <   72(21)    39.     180.00
   2  -7  29 <  -8.514      6.924   0.00 
   2  -6  17 o    4(7)      0.     180.00
   2  -5  18 o    2(6)      5.      0.00 
   2  -5  19 o    3(6)      5.      0.00 
   3  -8  27 <    5(24)     0.     180.00
   3  -7  29 <   10(17)     2.      0.00 
_reflns_number_total                   60
_reflns_limit_h_min                    0
_reflns_limit_h_max                    3
_reflns_limit_k_min                    -10
_reflns_limit_k_max                    -1
_reflns_limit_l_min                    3
_reflns_limit_l_max                    31
_reflns_d_resolution_high              0.499
_reflns_d_resolution_low               4.655
data_UNOFA_s_19


loop_
      _refln_index_h
      _refln_index_k
      _refln_index_l
      _refln_observed_status
      _refln_F_squared_meas
      _refln_F_squared_calc
      _refln_phase_calc
   2  -2   1 o   1.9(4)     2.3    180.00
   2  -1   0 o  91.5(17)   84.3    180.00
   2  -1   1 o  45.3(15)   47.7     0.00 
   3  -3  -1 o   1.5(12)    1.4    180.00
   3  -3   1 o  31.9(14)   59.1    180.00
   3  -2   0 o  109.8(22)  106.6    0.00 
   4  -4  -1 o   72(5)     62.      0.00 
   4  -4   2 o  41.3(27)   42.4     0.00 
   4  -3  -1 o   18(4)     13.     180.00
   4  -3   0 o   9.9(13)   12.9    180.00
   4  -3   1 o   1.8(11)    9.1     0.00 
   4  -3   2 o  21.0(18)   18.7    180.00
   4  -2   0 o  81.3(30)   71.3    180.00
   4  -2   1 o  47.9(23)   50.9     0.00 
   5  -5   2 o   34(7)     20.      0.00 
   5  -4  -1 o   23(6)     12.      0.00 
   5  -4   0 o   9.0(29)    9.6     0.00 
   5  -4   2 o   19(4)     17.     180.00
   5  -3  -1 o   88(5)     91.     180.00
   5  -3   0 o   17(4)     14.      0.00 
   5  -3   1 o  21.2(28)   34.7    180.00
   5  -3   2 o  13.7(27)   13.1    180.00
   6  -6  -1 o   39(10)    20.     180.00
   6  -6   2 o    9(4)      5.     180.00
   6  -5  -1 o   20(12)    11.      0.00 
   6  -5   0 o   15(10)     7.     180.00
   6  -5   1 o    6(5)     11.      0.00 
   6  -5   2 o    6(4)      8.     180.00
   6  -4  -1 o    0(5)      0.      0.00 
   6  -4   0 o    6(4)      0.     180.00
   6  -4   2 o    6(6)      0.      0.00 
   6  -4   3 o   42(6)     46.     180.00
   6  -3   0 o   2.7(34)    8.3    180.00
   6  -3   1 o   2.4(34)    1.7    180.00
   6  -3   2 o   6.2(27)    2.2     0.00 
   6  -3   3 o   14(5)     22.      0.00 
   7  -7  -2 < -19.080      0.004  180.00
   7  -7  -1 <  -8.624      2.195  180.00
   7  -7   3 <    3(7)      6.     180.00
   7  -6  -2 o    8(8)      9.     180.00
   7  -6   1 o   35(17)    19.     180.00
   7  -5  -2 o   28(9)     31.      0.00 
   7  -5  -1 o   41(15)    14.     180.00
   7  -5   0 o    0(7)      0.     180.00
   7  -5   1 o    8(7)      7.      0.00 
   7  -5   3 o   25(10)    15.      0.00 
   7  -4   0 o   90(9)     76.     180.00
   7  -4   1 o   47(13)    28.      0.00 
   7  -4   3 o  -3.662      5.057   0.00 
   7  -4   4 o    4(5)      0.      0.00 
   7  -3   1 o    9(4)      0.      0.00 
   8  -8  -3 <    2(11)     9.     180.00
   8  -8  -2 <   15(11)     1.      0.00 
   8  -7  -2 <  -5.097      2.819   0.00 
   8  -7  -1 <   10(21)     0.     180.00
   8  -7   1 <    1(9)      2.     180.00
   8  -7   2 <   15(10)     0.     180.00
   8  -7   3 < -12.234      0.678   0.00 
   8  -7   4 <    1(10)    11.      0.00 
   8  -6   0 <    1(9)      2.      0.00 
   8  -6   1 <    9(9)      0.     180.00
   8  -6   2 <  -3.712      0.917   0.00 
   8  -5  -1 o   19(8)      5.     180.00
   8  -5   3 o  -4.732      0.916   0.00 
   8  -5   4 <  -0.028      0.748   0.00 
   8  -4   5 o   58(12)    67.      0.00 
   9  -8   1 <   13(29)     3.     180.00
   9  -8   2 <    2(13)     0.     180.00
   9  -8   4 <   23(21)     2.     180.00
   9  -8   5 <   14(12)     1.     180.00
   9  -7  -2 <  -3.527      1.534   0.00 
   9  -7   0 <    2(12)    13.     180.00
   9  -7   1 <   16(13)    12.     180.00
   9  -7   2 <  -5.035      0.913  180.00
   9  -6  -2 <    3(11)     3.     180.00
   9  -6  -1 <   17(11)     6.     180.00
   9  -5  -2 <   16(9)      0.     180.00
   9  -5   4 <   13(9)     15.      0.00 
  10  -9  -3 <    1(19)     2.      0.00 
  10  -9   0 <   10(40)     1.     180.00
  10  -8   0 <   16(17)     2.     180.00
  10  -8   3 <  -2.607      0.125   0.00 
  10  -8   4 <    1(14)     0.      0.00 
  10  -7  -3 <   22(17)     8.     180.00
  10  -7  -2 <    2(23)    16.     180.00
  10  -7   2 <    1(14)     5.      0.00 
  10  -7   3 <    8(15)     1.      0.00 
  10  -6   2 < -14.533      0.831  180.00
  10  -5  -1 <   18(12)     5.     180.00
  10  -5   5 < -23.370      0.224   0.00 
  10  -5   6 <    6(11)     1.     180.00
  10  -4   0 <   40(12)    11.      0.00 
  11  -7   2 <   33(16)     0.      0.00 
  11  -6  -1 <    5(17)     0.     180.00
  11  -5  -1 <  -2.192      0.065  180.00
  11  -5   0 <  -7.429      1.428  180.00
  11  -5   1 <   74(32)    22.      0.00 
  11  -5   2 <   41(13)    19.      0.00 
  11  -5   3 <   25(18)     1.      0.00 
  12  -5   0 <   11(18)     8.      0.00 
_reflns_number_total                   51
_reflns_limit_h_min                    2
_reflns_limit_h_max                    12
_reflns_limit_k_min                    -9
_reflns_limit_k_max                    -1
_reflns_limit_l_min                    -3
_reflns_limit_l_max                    6
_reflns_d_resolution_high              0.499
_reflns_d_resolution_low               2.998
data_UNOFA_s_20


loop_
      _refln_index_h
      _refln_index_k
      _refln_index_l
      _refln_observed_status
      _refln_F_squared_meas
      _refln_F_squared_calc
      _refln_phase_calc
   2  -2   3 o   9.5(11)   9.1     0.00 
   2  -2   4 o   5.8(13)   7.4     0.00 
   3  -4   8 o   3.9(14)  10.4     0.00 
   3  -3   4 o   4.1(9)    4.2     0.00 
   3  -3   5 o  28.1(21)  25.7     0.00 
   3  -3   7 o  47.3(27)  47.1     0.00 
   3  -2   4 o  44.5(19)  45.2    180.00
   3  -2   5 o   1.8(8)    4.6     0.00 
   3  -2   6 o   2.5(9)    4.6    180.00
   3  -2   7 o  98.9(30)  94.2     0.00 
   4  -5   8 o   5.5(21)   0.0    180.00
   4  -5  10 o   2.6(29)   4.0     0.00 
   4  -4   5 o  30.1(29)  32.8    180.00
   4  -4   6 o  24.3(23)  27.0    180.00
   4  -4   7 o   16(4)    10.     180.00
   4  -4   9 o  22.3(26)  22.1     0.00 
   4  -3   5 o  20.8(25)  22.0    180.00
   4  -3   6 o   0.2(25)   1.4     0.00 
   4  -3   7 o  10.5(31)   8.4     0.00 
   4  -3   8 o   2.9(18)   4.3     0.00 
   4  -3   9 o   3.4(19)   4.4    180.00
   5  -6  12 o    9(8)     7.     180.00
   5  -5   6 o    8(4)     0.      0.00 
   5  -5   7 o   23(7)    10.     180.00
   5  -5   9 o    1(8)     1.     180.00
   5  -5  10 o   13(6)     5.      0.00 
   5  -5  11 o    5(4)     8.     180.00
   5  -5  12 o   31(7)    19.      0.00 
   5  -4   7 o    6(4)     4.     180.00
   5  -4   8 o  21.0(34)  27.3     0.00 
   5  -4   9 o   17(6)     5.     180.00
   5  -4  10 o   23(6)    26.      0.00 
   5  -4  11 o   0.1(34)   4.4    180.00
   5  -3   6 o  32.1(34)  35.0     0.00 
   5  -3   7 o  13.5(34)  48.5     0.00 
   5  -3   9 o  -0.941     1.621   0.00 
   6  -7  11 <  -1.735     1.172   0.00 
   6  -6   7 o   20(9)     4.      0.00 
   6  -6   8 o    1(9)     9.      0.00 
   6  -6  10 o   18(15)   10.     180.00
   6  -6  13 <    2(7)     2.     180.00
   6  -5   8 o   10(5)     4.      0.00 
   6  -5  10 o  -7.537     5.731  180.00
   6  -5  12 o  -5.494     3.313  180.00
   6  -5  13 o    8(9)     7.     180.00
   6  -5  14 o   34(7)    32.      0.00 
   6  -4   7 o    4(4)     5.      0.00 
   6  -4  10 o   14(6)     3.     180.00
   6  -4  11 o    3(7)     4.     180.00
   6  -4  12 o    1(5)     9.      0.00 
   6  -4  13 o    6(6)    10.     180.00
   6  -4  14 o   16(5)     1.      0.00 
   7  -9  17 <   47(21)    0.     180.00
   7  -8  13 <    1(14)    6.      0.00 
   7  -8  15 <  -1.015     5.102  180.00
   7  -8  17 < -20.403     1.532  180.00
   7  -7   8 <  -3.045     0.677   0.00 
   7  -7  12 <  -1.255     0.001   0.00 
   7  -7  13 <  -2.091     0.584  180.00
   7  -7  15 <   14(12)   19.     180.00
   7  -7  16 <  -2.313     2.442  180.00
   7  -7  17 <    4(11)    1.      0.00 
   7  -6   8 <  -2.000     8.674  180.00
   7  -6  13 <   27(17)    0.     180.00
   7  -6  14 <   16(16)    0.     180.00
   7  -6  15 <   10(11)    0.      0.00 
   7  -6  16 <   17(15)    0.      0.00 
   7  -5   8 o   16(10)    1.     180.00
   7  -5  11 <    7(9)    11.     180.00
   7  -5  14 <    2(9)     0.     180.00
   7  -5  16 <  -0.098     0.210  180.00
   7  -5  17 <    9(9)     0.      0.00 
   7  -4   8 o   106(10)  74.      0.00 
   7  -4   9 o   31(9)    32.     180.00
   7  -4  10 o   22(14)    0.      0.00 
   8  -9   9 <   20(14)    2.      0.00 
   8  -9  10 <    4(26)   14.     180.00
   8  -9  12 < -17.555     0.382  180.00
   8  -9  13 <    6(24)    1.     180.00
   8  -8  10 <  -0.228     0.022   0.00 
   8  -8  14 <   30(21)    1.     180.00
   8  -7  12 < -25.406     7.542  180.00
   8  -7  13 < -11.534     8.536  180.00
   8  -7  15 <   17(13)    0.      0.00 
   8  -7  18 <    5(21)    0.      0.00 
   8  -7  19 < -14.633     0.074   0.00 
   8  -6  13 <   28(12)    1.      0.00 
   8  -6  15 <   75(24)    1.      0.00 
   8  -6  16 <  -0.117     2.393  180.00
   8  -6  18 < -10.469     2.228  180.00
   8  -5  10 <   18(17)   20.     180.00
   8  -5  11 <   47(20)   18.     180.00
   8  -5  12 < -10.359     2.452   0.00 
   8  -5  15 <    6(12)    9.     180.00
   9  -7  12 <   25(15)    1.     180.00
   9  -7  12 < -20.237     1.155  180.00
   9  -6   9 <  -0.412     0.048   0.00 
   9  -6  13 < -27.374     5.459  180.00
   9  -6  15 <   28(27)   13.     180.00
   9  -6  18 <   33(24)   10.      0.00 
   9  -6  20 <    2(18)    1.     180.00
   9  -5  10 < -11.945     0.290  180.00
   9  -5  12 <    3(18)    0.     180.00
   9  -5  13 <   24(18)    1.     180.00
  10  -7  12 <   12(17)    2.      0.00 
  10  -6  11 <   54(32)    0.      0.00 
  10  -6  12 <   23(15)    5.     180.00
_reflns_number_total                   54
_reflns_limit_h_min                    2
_reflns_limit_h_max                    10
_reflns_limit_k_min                    -9
_reflns_limit_k_max                    -2
_reflns_limit_l_min                    3
_reflns_limit_l_max                    20
_reflns_d_resolution_high              0.504
_reflns_d_resolution_low               2.181
data_UNOFA_s_21


loop_
      _refln_index_h
      _refln_index_k
      _refln_index_l
      _refln_observed_status
      _refln_F_squared_meas
      _refln_F_squared_calc
      _refln_phase_calc
   1  -1  -3 o  36.3(11)  31.4    180.00
   1  -1  -2 o   6.7(6)    7.9     0.00 
   2  -2  -6 o  20.7(10)  22.1     0.00 
   2  -2  -5 o  18.5(10)  18.6    180.00
   2  -2  -4 o  55.9(16)  54.9     0.00 
   2  -1  -5 o   4.9(5)    5.3    180.00
   2  -1  -4 o  58.7(16)  56.7    180.00
   3  -4  -9 o   1.1(25)   5.7     0.00 
   3  -3  -9 o  17.6(24)  25.0    180.00
   3  -3  -7 o   9.5(11)  11.9    180.00
   3  -3  -6 o  55.9(22)  54.7    180.00
   3  -2  -8 o  -0.076     0.149  180.00
   3  -2  -7 o   1.4(6)    2.1    180.00
   3  -2  -6 o  29.3(14)  28.3    180.00
   4  -5 -12 o  -1.246     0.917  180.00
   4  -4 -12 o   30(7)    32.      0.00 
   4  -4 -10 o   4.7(29)   9.6     0.00 
   4  -4  -8 o  19.0(25)  30.6    180.00
   4  -4  -7 o  11.2(18)  19.2    180.00
   4  -3 -12 o   49(4)    65.     180.00
   4  -3 -11 o   0.2(29)   9.5     0.00 
   4  -3 -10 o   97(5)    97.     180.00
   4  -3  -8 o   96(5)    98.     180.00
   4  -2 -11 o  13.4(32)  14.8     0.00 
   4  -2 -10 o  22.8(26)  23.8    180.00
   4  -2  -9 o  -0.772     1.072  180.00
   5  -6 -15 o   12(11)    1.     180.00
   5  -6 -13 o   19(14)    1.      0.00 
   5  -5 -14 o    9(9)     2.      0.00 
   5  -5 -12 o  -3.105     0.058  180.00
   5  -5 -11 o    5(5)     4.     180.00
   5  -5 -10 o   12(5)     7.     180.00
   5  -5  -9 o   7.1(34)   4.1    180.00
   5  -4 -14 o  -2.088     3.061  180.00
   5  -4 -12 o   11(5)    13.     180.00
   5  -4 -11 o    2(4)     0.      0.00 
   5  -4 -10 o    8(4)    13.      0.00 
   5  -3 -14 o    5(10)    9.      0.00 
   5  -3 -13 o   22(6)    26.     180.00
   5  -3 -11 o   51(6)    46.     180.00
   6  -7 -16 <    4(10)    0.     180.00
   6  -6 -18 <   31(10)   25.     180.00
   6  -6 -16 <   10(9)    12.     180.00
   6  -6 -15 <  -7.988     0.223  180.00
   6  -5 -17 o    1(9)     6.     180.00
   6  -5 -16 o    1(8)     7.      0.00 
   6  -5 -14 o   15(12)    3.     180.00
   6  -5 -13 o   49(14)   21.     180.00
   6  -5 -12 o  -4.643     1.915   0.00 
   6  -4 -13 o    7(5)    29.      0.00 
   6  -4 -12 o   11(7)     4.      0.00 
   6  -3 -16 o   32(6)    14.      0.00 
   6  -3 -13 o   16(7)    13.      0.00 
   6  -3 -12 o  -0.433     0.121   0.00 
   6  -3 -11 o    5(4)    14.     180.00
   7  -8 -19 < -10.824     1.040  180.00
   7  -8 -18 <    9(14)    7.      0.00 
   7  -8 -17 < -11.800     1.371  180.00
   7  -7 -22 <   95(22)    0.      0.00 
   7  -7 -18 <    5(11)    0.      0.00 
   7  -7 -16 <   13(11)    1.     180.00
   7  -7 -15 <  -0.164     7.667   0.00 
   7  -6 -20 <    7(13)   11.      0.00 
   7  -6 -19 <    3(11)    1.     180.00
   7  -6 -18 <   32(26)   13.      0.00 
   7  -5 -20 <   17(11)    0.      0.00 
   7  -5 -19 < -12.923     3.340   0.00 
   7  -5 -17 <    5(10)    3.      0.00 
   7  -5 -15 <    6(8)     2.      0.00 
   7  -5 -14 o -10.046     1.003  180.00
   7  -4 -20 <    2(10)   11.      0.00 
   7  -4 -18 <   27(12)   10.      0.00 
   7  -4 -16 o  -1.123     1.273  180.00
   7  -4 -15 o   38(12)   26.      0.00 
   7  -4 -14 o   35(11)   20.      0.00 
   7  -4 -13 o    5(6)    10.      0.00 
   8  -8 -19 <   10(17)    6.      0.00 
   8  -8 -17 < -21.276    16.102  180.00
   8  -8 -16 <   48(26)   32.      0.00 
   8  -8 -15 <   55(26)   26.     180.00
   8  -7 -25 <   64(27)    0.     180.00
   8  -7 -23 < -21.133     2.224  180.00
   8  -7 -18 <   23(15)   33.      0.00 
   8  -6 -22 <    0(16)    0.      0.00 
   8  -6 -20 <  -5.047    16.065   0.00 
   8  -6 -19 <    1(13)    9.      0.00 
   8  -6 -15 <    9(11)    2.     180.00
   8  -5 -23 <   11(27)    3.      0.00 
   8  -5 -21 <   18(17)    0.      0.00 
   8  -5 -19 <   25(12)    0.     180.00
   8  -5 -17 <  -6.140     5.041  180.00
   8  -5 -15 <    8(10)    8.      0.00 
   8  -4 -19 <    0(9)     2.     180.00
   8  -4 -18 <  -8.309     2.147   0.00 
   9  -8 -18 <    5(18)    5.     180.00
   9  -8 -16 <   17(14)    1.     180.00
   9  -7 -21 <   13(17)    3.      0.00 
   9  -7 -20 <    7(16)    1.      0.00 
   9  -7 -19 <  -1.965     0.618   0.00 
   9  -7 -18 <  -4.298     0.015  180.00
   9  -7 -17 <   11(14)    4.     180.00
   9  -6 -24 <  -1.912     1.111   0.00 
   9  -6 -23 <  -2.473     0.188   0.00 
   9  -6 -22 <   21(16)    2.      0.00 
   9  -6 -18 <  -9.228    13.611  180.00
   9  -5 -26 < -31.945     1.144   0.00 
   9  -5 -25 <    8(20)    0.     180.00
   9  -5 -20 <   17(13)   11.     180.00
  10  -6 -21 <   15(16)    1.      0.00 
  10  -6 -20 <    9(20)    0.      0.00 
  10  -6 -19 <   28(26)    3.     180.00
  10  -5 -22 <   40(22)    0.      0.00 
_reflns_number_total                   56
_reflns_limit_h_min                    1
_reflns_limit_h_max                    10
_reflns_limit_k_min                    -8
_reflns_limit_k_max                    -1
_reflns_limit_l_min                    -26
_reflns_limit_l_max                    -2
_reflns_d_resolution_high              0.506
_reflns_d_resolution_low               4.378
data_UNOFA_s_22


loop_
      _refln_index_h
      _refln_index_k
      _refln_index_l
      _refln_observed_status
      _refln_F_squared_meas
      _refln_F_squared_calc
      _refln_phase_calc
   2  -1  -2 o   3.9(7)    3.5     0.00 
   3  -2  -3 o  11.1(14)   9.9     0.00 
   3  -2  -2 o   1.4(7)    2.3    180.00
   3  -2  -1 o  29.4(19)  30.8    180.00
   4  -3  -5 o   183(4)   177.     0.00 
   4  -3  -4 o   150(4)   152.     0.00 
   4  -3  -3 o   2.2(11)   0.0    180.00
   4  -3  -2 o  82.9(29)  85.8     0.00 
   4  -3  -1 o  14.8(20)  12.6    180.00
   4  -2  -5 o  15.6(22)  10.4     0.00 
   4  -2  -4 o   274(5)   274.     0.00 
   4  -2  -3 o  70.0(29)  60.4    180.00
   4  -2  -2 o   5.5(11)  13.0    180.00
   5  -4  -6 o  29.7(34)  29.7     0.00 
   5  -4  -5 o  -3.459     0.019   0.00 
   5  -4  -4 o  39.0(34)  41.6     0.00 
   5  -4  -3 o   2.2(22)   5.1     0.00 
   5  -4  -2 o   3.5(24)   1.1     0.00 
   5  -3  -6 o   24(4)    23.      0.00 
   5  -3  -5 o   77(4)    71.      0.00 
   5  -3  -4 o   8.9(28)   9.1    180.00
   5  -3  -3 o  11.4(29)   7.8     0.00 
   5  -3  -2 o   108(4)   117.    180.00
   5  -2  -4 o   6.1(29)   6.1    180.00
   5  -2  -3 o  84.9(33)  90.5    180.00
   6  -5  -7 o    6(4)     3.     180.00
   6  -5  -6 o   12(9)    14.      0.00 
   6  -5  -5 o   12(4)     8.      0.00 
   6  -4  -7 o   5.3(31)   5.4    180.00
   6  -3  -6 o   16(6)    16.      0.00 
   6  -3  -5 o   35(5)    27.     180.00
   6  -3  -4 o   24(4)    18.     180.00
   6  -3  -3 o   6.7(27)  17.6     0.00 
   7  -6  -8 o   11(8)     0.     180.00
   7  -5  -7 o    3(6)     4.      0.00 
   7  -5  -6 o    4(5)    20.     180.00
   7  -5  -3 o   23(10)   11.     180.00
   7  -5  -2 o   38(7)    31.      0.00 
   7  -4  -9 o   22(8)     9.     180.00
   7  -4  -7 o  -3.192     0.444  180.00
   7  -4  -4 o   32(8)    25.      0.00 
   7  -3  -9 o   30(9)    13.      0.00 
   7  -3  -8 o  -2.788     9.103   0.00 
   7  -3  -7 o   26(6)    10.      0.00 
   7  -3  -5 o   2.9(33)   3.1     0.00 
   7  -3  -4 o    4(6)     0.      0.00 
   8  -7  -6 <   80(19)   29.      0.00 
   8  -6 -10 <   25(17)    0.     180.00
   8  -6  -6 <   14(9)     1.      0.00 
   8  -5  -6 o -16.112     0.313   0.00 
   8  -5  -3 o   13(6)     0.     180.00
   8  -4 -11 o   25(7)     8.     180.00
   8  -4 -10 o  -4.760     2.008  180.00
   8  -4  -9 o    9(7)     5.      0.00 
   8  -4  -5 o   13(8)     7.      0.00 
   8  -4  -4 o    8(5)     7.      0.00 
   8  -3  -4 o    3(6)     5.     180.00
   9  -7 -11 <   14(24)   11.     180.00
   9  -7  -9 <   30(21)   33.      0.00 
   9  -7  -7 <    1(19)   18.      0.00 
   9  -7  -4 <   10(11)   15.      0.00 
   9  -6 -10 <   84(26)   29.      0.00 
   9  -6  -9 <   11(13)   15.      0.00 
   9  -6  -8 < -15.250     3.532   0.00 
   9  -6  -7 <  -2.247     7.044  180.00
   9  -6  -4 <   20(10)    5.     180.00
   9  -5 -10 <    7(11)    2.     180.00
   9  -5  -7 <  -0.209     1.058   0.00 
   9  -5  -5 <   22(15)    4.     180.00
   9  -4 -12 < -17.357     2.513  180.00
   9  -4  -6 <    6(9)    15.      0.00 
   9  -4  -4 <    5(7)     4.      0.00 
  10  -8 -12 <  -6.689     0.165   0.00 
  10  -8 -11 <   45(36)    2.      0.00 
  10  -8  -8 <  -6.048     0.091  180.00
  10  -8  -6 < -12.831     0.057   0.00 
  10  -7  -9 <   48(22)    1.      0.00 
  10  -7  -4 <  -6.397     0.022  180.00
  10  -6 -12 <  -3.935     8.388   0.00 
  10  -6  -9 < -24.556    10.679  180.00
  10  -5 -13 <   18(15)    4.     180.00
  10  -5 -12 < -11.416     1.140   0.00 
  10  -5  -7 <   38(12)   37.      0.00 
  10  -5  -6 <   54(28)   26.     180.00
  10  -4  -8 <   43(18)   22.     180.00
  10  -4  -7 <    6(11)    4.      0.00 
  10  -4  -5 <   12(11)   15.     180.00
  11  -8  -6 <  -6.574     0.173   0.00 
  11  -8  -4 <   25(16)    1.      0.00 
  11  -6 -15 <  -7.660     1.090  180.00
  11  -5  -9 <    7(24)    0.      0.00 
  11  -5  -6 <   14(15)   14.     180.00
  11  -5  -5 <  -6.352     0.098   0.00 
  12  -5 -12 <   23(20)    1.      0.00 
_reflns_number_total                   54
_reflns_limit_h_min                    2
_reflns_limit_h_max                    12
_reflns_limit_k_min                    -8
_reflns_limit_k_max                    -1
_reflns_limit_l_min                    -15
_reflns_limit_l_max                    -1
_reflns_d_resolution_high              0.493
_reflns_d_resolution_low               2.934
data_UNOFA_s_23


loop_
      _refln_index_h
      _refln_index_k
      _refln_index_l
      _refln_observed_status
      _refln_F_squared_meas
      _refln_F_squared_calc
      _refln_phase_calc
  -5 -12   6 <   28(25)    7.      0.00 
  -4 -13   4 <   22(19)    0.      0.00 
  -4 -12   1 <  -3.386     1.304   0.00 
  -4 -12   2 <    6(15)    1.      0.00 
  -4 -12   6 <   27(17)    0.     180.00
  -4 -11   2 <   17(16)    2.     180.00
  -4 -11   3 <  -9.253    12.272  180.00
  -4 -11   5 <   17(15)   31.     180.00
  -4 -11   6 <   67(33)    0.     180.00
  -4 -10   0 <   27(12)   12.     180.00
  -4 -10   2 <  -1.458     7.434  180.00
  -4 -10   5 <    2(12)   11.      0.00 
  -4 -10   6 <  -3.651     0.159   0.00 
  -4  -9   4 <  -9.733     0.603   0.00 
  -4  -9   5 <    7(10)   22.     180.00
  -4  -9   6 <   173(21)  65.      0.00 
  -3 -13   5 < -12.633     0.243   0.00 
  -3 -13   7 <  -3.695     0.139   0.00 
  -3 -12  -1 <  -2.005     0.500  180.00
  -3 -12   2 <    1(14)    0.     180.00
  -3 -12   3 <   14(14)    2.     180.00
  -3 -12   5 <  -8.844     0.168   0.00 
  -3 -12   7 <  -1.768     0.157  180.00
  -3 -11   0 <    4(19)    1.      0.00 
  -3 -11   2 < -12.707    18.094  180.00
  -3 -11   5 < -14.025     0.102  180.00
  -3 -11   6 <    1(22)    0.     180.00
  -3 -10   1 <    1(9)     1.     180.00
  -3 -10   4 <  -2.591     2.376   0.00 
  -3  -9   0 o  -3.944     0.133  180.00
  -3  -9   1 o   10(11)    1.      0.00 
  -3  -9   4 o   13(10)   35.     180.00
  -3  -9   5 o   22(18)   24.      0.00 
  -3  -8   3 o    2(7)     3.      0.00 
  -3  -8   4 o    4(13)    2.     180.00
  -3  -8   5 o   29(9)    43.     180.00
  -2 -13   0 <  -5.546     1.017   0.00 
  -2 -13   3 <   14(18)    0.     180.00
  -2 -12   0 <   15(12)    5.      0.00 
  -2 -12   3 <   45(20)    0.      0.00 
  -2 -12   6 < -14.268     0.913   0.00 
  -2 -11  -1 <   14(11)   10.      0.00 
  -2 -11   3 <   11(12)    3.     180.00
  -2 -11   4 < -15.522     0.126   0.00 
  -2 -11   5 <  -1.248     0.174  180.00
  -2 -11   6 <  -3.226    12.822  180.00
  -2 -10   1 <    5(10)    3.     180.00
  -2  -9  -1 o   21(14)   21.      0.00 
  -2  -9   0 o   26(12)   12.     180.00
  -2  -9   1 o    9(7)     9.      0.00 
  -2  -9   2 o  -3.717     0.016   0.00 
  -2  -9   5 o    3(15)    0.     180.00
  -2  -8   0 o  -0.293     2.960  180.00
  -2  -8   1 o   20(6)    27.     180.00
  -2  -8   3 o   45(10)   32.     180.00
  -2  -8   4 o   10(7)     1.      0.00 
  -2  -7   2 o    2(4)     0.     180.00
  -2  -7   3 o    2(8)     2.     180.00
  -2  -6   0 o   8.7(20)  23.9    180.00
  -2  -6   2 o   24(4)    28.     180.00
  -2  -6   3 o   26(6)    17.      0.00 
  -2  -5   0 o  29.0(23)  33.1    180.00
  -2  -5   1 o  11.5(21)  11.3    180.00
  -2  -5   2 o   3.5(16)   7.5    180.00
  -2  -5   3 o   57(5)    57.      0.00 
  -1 -13   2 <  -5.894     0.268  180.00
  -1 -12   2 <  -1.768     0.338   0.00 
  -1 -12   3 <   29(28)    1.      0.00 
  -1 -12   5 <    7(16)    8.     180.00
  -1 -12   6 <   28(15)    9.     180.00
  -1 -11  -1 <    3(14)    3.     180.00
  -1 -11   0 <    4(11)   25.     180.00
  -1 -11   1 <    5(25)    2.     180.00
  -1 -11   2 <   31(22)    7.     180.00
  -1 -11   4 <    1(13)   20.     180.00
  -1 -10   0 <    6(8)     3.      0.00 
  -1 -10   1 <   32(19)    2.     180.00
  -1 -10   5 <  -6.827     0.081  180.00
  -1  -9   2 o   50(17)   52.     180.00
  -1  -8  -1 o   23(11)   12.      0.00 
  -1  -8   0 o   28(8)    21.     180.00
  -1  -8   3 o    2(6)    16.     180.00
  -1  -8   4 o    0(6)     9.      0.00 
  -1  -7   0 o  -5.540     0.329  180.00
  -1  -7   1 o    4(4)    10.     180.00
  -1  -6   0 o   55(5)    61.     180.00
  -1  -6   1 o   41(4)    41.     180.00
  -1  -6   2 o   16(5)    10.     180.00
  -1  -6   3 o   16(6)    16.     180.00
  -1  -5   0 o  13.2(26)  11.5    180.00
  -1  -5   1 o   7.9(19)  11.3     0.00 
  -1  -5   2 o   98(4)    98.      0.00 
  -1  -4   0 o  19.0(13)  17.9    180.00
  -1  -4   1 o   4.9(9)    2.3     0.00 
  -1  -4   2 o  59.2(23)  56.5     0.00 
  -1  -3   0 o  13.5(10)  10.9     0.00 
  -1  -3   1 o  32.3(13)  31.0    180.00
   0 -13   3 <    4(15)    0.      0.00 
   0 -13   4 <   37(36)    0.     180.00
   0 -12   4 <   10(13)    4.     180.00
   0 -12   5 <   148(32)   8.     180.00
   0 -11   3 <  -2.718    15.030  180.00
   0 -11   4 <  -5.005     2.091   0.00 
   0 -10   3 <   25(16)    0.     180.00
   0 -10   4 <   20(8)     0.     180.00
   0  -7   2 o    3(4)     3.      0.00 
   0  -6   2 o   24(4)    25.     180.00
   0  -5   2 o   0.1(15)   0.5     0.00 
   0  -3   1 o   6.5(5)    7.2     0.00 
_reflns_number_total                   48
_reflns_limit_h_min                    -5
_reflns_limit_h_max                    0
_reflns_limit_k_min                    -13
_reflns_limit_k_max                    -3
_reflns_limit_l_min                    -1
_reflns_limit_l_max                    7
_reflns_d_resolution_high              0.494
_reflns_d_resolution_low               2.229
data_UNOFA_s_24


loop_
      _refln_index_h
      _refln_index_k
      _refln_index_l
      _refln_observed_status
      _refln_F_squared_meas
      _refln_F_squared_calc
      _refln_phase_calc
  -5 -12  -6 <    3(22)    2.      0.00 
  -4 -12  -9 <    6(24)    2.     180.00
  -4 -11 -14 <   53(44)    1.     180.00
  -4 -11 -12 < -15.277     0.015   0.00 
  -4 -11  -8 < -37.541     0.347  180.00
  -4 -11  -6 <   28(26)    1.     180.00
  -4 -10 -14 <   26(23)    0.      0.00 
  -4 -10 -12 < -22.068     0.001  180.00
  -4 -10  -7 <   18(16)    2.      0.00 
  -4 -10  -6 <   32(14)    4.      0.00 
  -3 -12  -6 < -26.025     0.405   0.00 
  -3 -11 -12 <   71(37)   12.      0.00 
  -3 -11 -10 <   73(25)    1.      0.00 
  -3 -11  -9 <   13(33)    0.      0.00 
  -3 -11  -8 <   39(17)    5.     180.00
  -3 -11  -6 <    1(36)    0.     180.00
  -3 -10 -14 < -13.710     1.721   0.00 
  -3 -10 -12 <    6(15)    5.      0.00 
  -3 -10 -10 <   19(14)    3.     180.00
  -3 -10  -8 <    5(14)    2.     180.00
  -3 -10  -6 <    3(16)    1.     180.00
  -3  -9  -7 <    1(13)   26.      0.00 
  -3  -9  -4 <   35(21)    0.      0.00 
  -3  -8 -11 o    7(12)   17.     180.00
  -3  -8  -9 o   38(18)   28.     180.00
  -3  -8  -8 o    3(17)   15.     180.00
  -3  -8  -6 o   50(12)   43.     180.00
  -3  -8  -5 o   15(13)   18.     180.00
  -3  -8  -4 o  -6.075     0.111   0.00 
  -2 -13  -6 <   14(22)    3.     180.00
  -2 -12 -10 < -10.567     2.052  180.00
  -2 -12  -9 <   25(20)    1.     180.00
  -2 -11 -14 <   47(23)   11.      0.00 
  -2 -11 -11 < -21.754     8.118  180.00
  -2 -11 -10 <    1(16)    1.     180.00
  -2 -10 -14 < -11.375     6.833  180.00
  -2 -10 -13 < -11.322     5.149  180.00
  -2 -10 -12 < -12.583    16.654  180.00
  -2 -10  -9 <    9(14)   13.      0.00 
  -2 -10  -7 <   32(18)   12.     180.00
  -2 -10  -5 <   28(18)    4.     180.00
  -2  -9 -13 <    6(14)    3.      0.00 
  -2  -9 -12 <    2(10)    3.     180.00
  -2  -9 -11 <    5(12)    2.      0.00 
  -2  -9  -9 <   54(17)   30.     180.00
  -2  -9  -8 <   23(12)   48.      0.00 
  -2  -9  -7 o   82(20)   52.     180.00
  -2  -9  -6 o  -7.967     0.922   0.00 
  -2  -8 -11 o   42(13)    5.     180.00
  -2  -8 -10 o    1(7)     6.      0.00 
  -2  -8  -9 o    4(13)   12.     180.00
  -2  -8  -8 o   41(7)    39.     180.00
  -2  -8  -7 o  -0.889     2.222   0.00 
  -2  -8  -6 o    0(7)     0.     180.00
  -2  -8  -5 o   22(8)    34.      0.00 
  -2  -8  -4 o    5(13)   19.      0.00 
  -2  -7 -10 o    3(5)     8.      0.00 
  -2  -7  -8 o    5(5)     6.      0.00 
  -2  -7  -7 o  -2.542     9.261   0.00 
  -2  -6  -7 o   21(6)    19.      0.00 
  -2  -6  -6 o   29(6)     9.     180.00
  -2  -6  -5 o    9(6)     0.      0.00 
  -2  -6  -4 o   11(4)    10.      0.00 
  -2  -5  -7 o   20(4)    20.      0.00 
  -2  -5  -5 o   34(4)    28.      0.00 
  -2  -5  -4 o   3.1(20)   8.0     0.00 
  -2  -5  -3 o   16(4)     9.      0.00 
  -1 -13  -8 <   48(22)    1.     180.00
  -1 -12  -9 < -17.855     0.290   0.00 
  -1 -12  -8 <  -6.633     2.126  180.00
  -1 -11 -13 <   13(16)    9.     180.00
  -1 -11 -12 <    4(36)   24.     180.00
  -1 -11 -10 <    4(17)    0.     180.00
  -1 -11  -8 < -35.032     1.900  180.00
  -1 -11  -6 <   25(23)    1.      0.00 
  -1 -10  -9 <   88(27)    7.      0.00 
  -1 -10  -7 <   49(13)   38.      0.00 
  -1  -9 -12 <    7(18)    1.     180.00
  -1  -9 -11 <   47(13)   32.      0.00 
  -1  -9 -10 <   35(8)    30.     180.00
  -1  -9  -8 o   10(10)    4.      0.00 
  -1  -9  -7 o   42(9)    37.     180.00
  -1  -9  -6 o   93(15)   41.      0.00 
  -1  -9  -5 o -10.613     1.644  180.00
  -1  -8 -10 o    0(7)     2.      0.00 
  -1  -8  -9 o   26(6)    17.     180.00
  -1  -8  -6 o -12.165     0.808   0.00 
  -1  -7 -10 o   32(8)     5.     180.00
  -1  -7  -7 o    7(6)     1.      0.00 
  -1  -7  -6 o   17(7)    17.      0.00 
  -1  -7  -5 o   46(9)    28.     180.00
  -1  -7  -4 o    1(6)     0.     180.00
  -1  -6  -8 o   10(5)    10.      0.00 
  -1  -6  -7 o   1.3(25)   1.3    180.00
  -1  -6  -6 o   33(4)    29.      0.00 
  -1  -6  -5 o   58(5)    54.      0.00 
  -1  -6  -4 o    7(5)     1.      0.00 
  -1  -6  -3 o   53(5)    52.      0.00 
  -1  -5  -7 o  10.8(17)  13.1     0.00 
  -1  -5  -6 o  25.3(31)  19.8    180.00
  -1  -5  -5 o  60.3(33)  53.3     0.00 
  -1  -5  -4 o   4.0(12)   3.0     0.00 
  -1  -5  -3 o  68.7(33)  66.8    180.00
  -1  -4  -5 o   2.7(11)   2.2     0.00 
  -1  -4  -4 o  -1.253     1.971  180.00
  -1  -4  -3 o  24.5(19)  18.5    180.00
  -1  -4  -2 o  81.2(26)  74.4    180.00
  -1  -3  -4 o   108(4)   134.    180.00
  -1  -3  -3 o   7.7(18)   2.4    180.00
  -1  -3  -2 o   3.7(12)   3.3    180.00
_reflns_number_total                   57
_reflns_limit_h_min                    -5
_reflns_limit_h_max                    -1
_reflns_limit_k_min                    -13
_reflns_limit_k_max                    -3
_reflns_limit_l_min                    -14
_reflns_limit_l_max                    -2
_reflns_d_resolution_high              0.504
_reflns_d_resolution_low               2.065
data_UNOFA_s_25


loop_
      _refln_index_h
      _refln_index_k
      _refln_index_l
      _refln_observed_status
      _refln_F_squared_meas
      _refln_F_squared_calc
      _refln_phase_calc
   1  -7   3 o    8(7)     16.     180.00
   1  -7  10 o    7(5)      5.     180.00
   1  -6   3 o   48(4)     52.      0.00 
   1  -6   4 o    1(5)      1.     180.00
   1  -6   5 o   54(5)     54.      0.00 
   1  -6   6 o   39(5)     29.     180.00
   1  -6   7 o   2.9(32)    1.3    180.00
   1  -6   8 o   17(7)     10.     180.00
   1  -5   2 o   152(4)    156.    180.00
   1  -5   3 o  64.0(34)   66.8     0.00 
   1  -5   4 o  -0.416      3.032   0.00 
   1  -5   5 o   54(4)     53.     180.00
   1  -5   6 o  17.0(23)   19.8    180.00
   1  -5   7 o  12.9(31)   13.1    180.00
   1  -4   2 o  71.5(26)   74.4     0.00 
   1  -4   3 o  18.0(16)   18.5    180.00
   1  -4   5 o   6.7(15)    2.2     0.00 
   1  -4   6 o   5.8(23)    3.2     0.00 
   1  -3   1 o  15.6(10)   16.0     0.00 
   1  -3   2 o   3.5(7)     3.3    180.00
   1  -3   3 o   3.7(10)    2.4     0.00 
   1  -3   4 o  140.8(27)  134.3   180.00
   2 -13   5 <   28(22)     0.      0.00 
   2 -13   7 <   14(19)     0.     180.00
   2 -13   8 < -31.059      9.050   0.00 
   2 -12   4 <    4(15)    11.     180.00
   2 -12   5 < -16.178      3.775   0.00 
   2 -12   6 <  -3.870      0.373   0.00 
   2 -12   8 <    3(29)     2.      0.00 
   2 -12  14 <   24(28)     1.      0.00 
   2 -12  15 <   16(37)     0.     180.00
   2 -12  16 <    6(27)     0.      0.00 
   2 -11   6 <    7(15)    18.      0.00 
   2 -11   9 <  -4.414     19.197  180.00
   2 -11  13 < -15.092      4.560   0.00 
   2 -11  15 <  -9.446      3.984   0.00 
   2 -10   4 <   11(12)     7.      0.00 
   2 -10   5 <   12(12)     4.      0.00 
   2 -10   9 <  -8.538     13.017  180.00
   2 -10  10 <   43(27)    15.     180.00
   2 -10  11 <    6(12)     3.      0.00 
   2 -10  12 <   13(11)    17.     180.00
   2 -10  14 <  -0.691      6.833  180.00
   2  -9   3 o   27(9)     18.      0.00 
   2  -9   4 o  -2.933     12.391   0.00 
   2  -9   6 o    5(10)     1.     180.00
   2  -9   7 o   82(23)    52.     180.00
   2  -9   8 <   61(15)    48.     180.00
   2  -9   9 <   48(16)    30.     180.00
   2  -9  11 <   12(11)     2.      0.00 
   2  -9  13 <   33(16)     3.      0.00 
   2  -8   5 o   60(14)    34.     180.00
   2  -8   8 o   45(14)    39.     180.00
   2  -8   9 o   41(19)    12.      0.00 
   2  -7   2 o    6(5)     10.      0.00 
   2  -7   3 o  -6.586      6.612  180.00
   2  -7   7 o   17(10)     9.      0.00 
   2  -7   8 o    0(7)      6.     180.00
   2  -7  11 o   40(12)    10.     180.00
   2  -6   1 o   20(6)     13.     180.00
   2  -6   2 o   41(4)     50.      0.00 
   2  -6   5 o   10(8)      0.     180.00
   2  -6   6 o   14(5)      9.     180.00
   2  -6   7 o  -0.720     19.446  180.00
   2  -6   9 o   17(5)     15.      0.00 
   2  -5   3 o   5.7(24)    8.6     0.00 
   2  -5   4 o   1.7(29)    8.0    180.00
   2  -5   5 o   25(6)     28.      0.00 
   2  -5   7 o    6(4)     20.      0.00 
   2  -5   8 o   31(6)     25.     180.00
   3 -13   6 <    7(49)     1.     180.00
   3 -12   7 <    2(21)     4.     180.00
   3 -11   4 < -20.909      7.831  180.00
   3 -11   5 <   78(33)     2.      0.00 
   3 -11   7 <  -1.368      2.730  180.00
   3 -11  11 <  -8.487      0.591  180.00
   3 -11  12 <   59(24)    12.      0.00 
   3 -11  14 < -25.094      0.301  180.00
   3 -11  17 <    2(21)     1.      0.00 
   3 -10   5 <  -1.198      1.158   0.00 
   3 -10   7 <    5(14)     1.     180.00
   3 -10   8 <    2(14)     2.      0.00 
   3 -10  11 <   51(22)     0.     180.00
   3 -10  15 <   29(17)    13.      0.00 
   3  -9   2 o    0(10)     0.      0.00 
   3  -9   6 <    3(12)    17.     180.00
   3  -9   7 <   16(12)    26.     180.00
   3  -9   8 <    1(25)     4.      0.00 
   3  -9   9 < -18.616      0.394   0.00 
   3  -9  12 <   12(18)     2.      0.00 
   3  -8   2 o   80(16)    40.     180.00
   3  -8   3 o   15(9)      8.      0.00 
   3  -8   5 o   11(10)    18.     180.00
   3  -8   6 o   73(22)    43.      0.00 
   3  -8   8 o   38(23)    15.      0.00 
   3  -8   9 o   60(17)    28.     180.00
   3  -8  10 o  -1.805      0.473  180.00
   4 -12   3 < -20.026      0.065  180.00
   4 -12   6 <   18(34)     2.     180.00
   4 -12  11 <   10(26)     3.      0.00 
   4 -11   8 <   69(29)     0.      0.00 
   4 -11  11 < -10.792      0.426  180.00
   4 -11  16 < -20.484      0.034   0.00 
   4 -11  17 <   36(27)     1.     180.00
   4 -10   4 <   198(35)   11.      0.00 
   4 -10   5 <   50(20)     3.      0.00 
   4 -10  16 < -30.289      0.511  180.00
   5 -12  10 <   44(29)     0.      0.00 
_reflns_number_total                   53
_reflns_limit_h_min                    1
_reflns_limit_h_max                    5
_reflns_limit_k_min                    -13
_reflns_limit_k_max                    -3
_reflns_limit_l_min                    1
_reflns_limit_l_max                    17
_reflns_d_resolution_high              0.495
_reflns_d_resolution_low               2.108
data_UNOFA_s_26


loop_
      _refln_index_h
      _refln_index_k
      _refln_index_l
      _refln_observed_status
      _refln_F_squared_meas
      _refln_F_squared_calc
      _refln_phase_calc
  -3 -12   8 <   26(18)    6.     180.00
  -3 -12  12 <   34(20)   17.      0.00 
  -3 -12  13 <   53(46)    7.      0.00 
  -3 -11   8 <    3(14)    5.      0.00 
  -3 -11  10 <   106(26)  54.      0.00 
  -3 -11  11 <   21(15)    7.      0.00 
  -3 -11  14 <   18(20)   15.     180.00
  -3 -11  15 < -15.772     1.646  180.00
  -3 -10  13 <   10(15)    2.      0.00 
  -2 -13   8 < -19.399     0.271  180.00
  -2 -13  10 < -11.527     0.016   0.00 
  -2 -13  11 <   12(22)    0.     180.00
  -2 -12   6 <  -3.249     0.913   0.00 
  -2 -12   7 <   38(18)    8.     180.00
  -2 -12  10 < -16.085     3.268  180.00
  -2 -12  15 <   47(22)    0.      0.00 
  -2 -12  16 < -28.840     0.019  180.00
  -2 -11   6 <   17(14)   13.     180.00
  -2 -11   9 <   27(15)   25.      0.00 
  -2 -11  11 <  -5.466     6.463  180.00
  -2 -11  13 <   14(18)   25.     180.00
  -2 -11  14 <   35(25)    1.      0.00 
  -2 -10   4 < -14.544     1.581   0.00 
  -2 -10  11 <  -2.217     0.205   0.00 
  -2 -10  12 <   35(19)    2.      0.00 
  -2 -10  13 <  -0.887     5.706   0.00 
  -2  -9   5 o    3(7)     0.     180.00
  -2  -9   6 o    1(8)     3.     180.00
  -2  -9   7 o   17(8)    16.      0.00 
  -2  -9  10 <   23(22)    8.      0.00 
  -2  -9  12 < -11.644     0.832  180.00
  -2  -8   6 o  -8.315     0.583   0.00 
  -2  -8   7 o  -1.977     3.797  180.00
  -2  -8  11 o  -9.565     0.308  180.00
  -2  -7  10 o    4(5)     5.      0.00 
  -1 -13   5 <  -9.660     0.048   0.00 
  -1 -12   5 <  -0.756     7.734  180.00
  -1 -12   7 <    9(19)   39.     180.00
  -1 -12   9 <    0(20)    1.     180.00
  -1 -12  13 <    6(19)    3.      0.00 
  -1 -12  15 <   88(38)    1.      0.00 
  -1 -11   5 <   23(15)   22.     180.00
  -1 -11   6 <   41(18)   16.      0.00 
  -1 -11   9 <   18(15)   27.      0.00 
  -1 -11  10 <   64(24)   29.     180.00
  -1 -11  13 <  -1.243     0.458  180.00
  -1 -10   7 <    3(12)    0.     180.00
  -1 -10  12 < -10.953     0.166   0.00 
  -1  -9   5 o  -7.123     0.923   0.00 
  -1  -9   8 o  -9.827     0.117   0.00 
  -1  -9   9 o   13(14)    0.     180.00
  -1  -9  10 <  -2.137     1.575   0.00 
  -1  -9  12 <   55(16)   42.     180.00
  -1  -9  13 <   72(22)   23.     180.00
  -1  -8   3 o   14(6)    16.     180.00
  -1  -8   9 o  -4.567    10.689  180.00
  -1  -8  11 o    8(11)    1.     180.00
  -1  -7   4 o  -5.891     6.070  180.00
  -1  -7   5 o   23(6)     6.     180.00
  -1  -7   6 o    9(4)    15.     180.00
  -1  -7   8 o    9(8)     3.     180.00
  -1  -6   3 o  16.9(28)  15.6    180.00
  -1  -6   4 o   38(4)    34.      0.00 
  -1  -6   6 o  22.5(29)  24.0    180.00
  -1  -6   7 o   67(4)    63.      0.00 
  -1  -6   8 o  13.4(27)  13.6     0.00 
  -1  -5   2 o   96(4)    98.      0.00 
  -1  -5   5 o  25.2(23)  27.0     0.00 
  -1  -5   6 o  15.7(18)  15.9     0.00 
  -1  -5   7 o  12.2(30)   7.0     0.00 
  -1  -4   2 o  57.9(25)  56.5     0.00 
  -1  -4   3 o  10.5(23)  10.0    180.00
  -1  -4   5 o  14.0(21)  13.2    180.00
   0 -13   6 <    2(20)    2.     180.00
   0 -13  12 <    4(24)    0.     180.00
   0 -12   6 <   23(18)    0.     180.00
   0 -12   7 <    9(19)    8.      0.00 
   0 -12  12 <   15(29)    1.      0.00 
   0 -12  15 <   12(31)    2.     180.00
   0 -12  17 <   33(20)    1.      0.00 
   0 -11   4 < -10.866     2.091   0.00 
   0 -11   5 <   17(16)   19.      0.00 
   0 -11   9 <   33(31)    2.     180.00
   0 -11  10 <    3(16)    0.     180.00
   0 -11  12 <    4(19)    0.     180.00
   0 -11  13 < -16.295     0.105  180.00
   0 -11  14 <   28(18)    1.     180.00
   0 -10   6 <   28(21)    3.     180.00
   0 -10   9 <   29(10)    9.      0.00 
   0 -10  10 <   22(14)    6.      0.00 
   0 -10  12 < -11.724     0.137   0.00 
   0  -9   3 o   32(12)    1.      0.00 
   0  -9   4 o    7(17)    3.     180.00
   0  -9   7 o    4(9)     3.      0.00 
   0  -8   3 o   20(9)     4.      0.00 
   0  -8   4 o    0(6)     1.      0.00 
   0  -8   5 o    4(5)    14.     180.00
   0  -8   6 o  -9.007     3.547   0.00 
   0  -8   8 o   20(7)    20.      0.00 
   0  -8  10 o  -3.839     7.136  180.00
   0  -7   3 o    5(5)     4.     180.00
   0  -7   5 o    2(4)     0.     180.00
   0  -7   6 o    6(4)     2.     180.00
   0  -7   7 o    0(5)     1.     180.00
   0  -7   9 o   38(12)   23.      0.00 
   0  -7  10 o    3(5)     0.      0.00 
   0  -6   3 o   48(4)    47.      0.00 
   0  -6   4 o   5.1(33)   4.6     0.00 
   0  -6   5 o   30(4)    27.      0.00 
   0  -6   6 o   197(6)   182.     0.00 
   0  -6   7 o  18.6(26)  20.7     0.00 
   0  -6   8 o   18(4)    11.      0.00 
   0  -5   2 o   1.6(13)   0.5     0.00 
   0  -5   3 o   9.1(13)   8.5    180.00
   0  -5   4 o   104(4)   103.     0.00 
   0  -5   5 o  37.5(27)  36.5    180.00
   0  -5   6 o   4.5(17)   4.4     0.00 
   0  -5   7 o  11.4(32)  11.8    180.00
   0  -4   2 o   2.3(10)   1.6     0.00 
   0  -4   3 o   0.3(13)   0.9     0.00 
   0  -4   4 o  45.3(23)  41.3     0.00 
   0  -4   5 o  26.8(19)  27.1     0.00 
   0  -3   1 o   8.8(9)    7.2     0.00 
   0  -3   2 o  57.2(22)  62.7     0.00 
   0  -3   4 o  17.1(11)  16.4     0.00 
   0  -2   1 o  64.2(31)  80.6     0.00 
   0  -2   2 o  24.6(16)  22.9     0.00 
_reflns_number_total                   65
_reflns_limit_h_min                    -3
_reflns_limit_h_max                    0
_reflns_limit_k_min                    -13
_reflns_limit_k_max                    -2
_reflns_limit_l_min                    1
_reflns_limit_l_max                    17
_reflns_d_resolution_high              0.493
_reflns_d_resolution_low               3.316
data_UNOFA_s_27


loop_
      _refln_index_h
      _refln_index_k
      _refln_index_l
      _refln_observed_status
      _refln_F_squared_meas
      _refln_F_squared_calc
      _refln_phase_calc
 -13  -4   3 <   48(17)     0.     0.00 
 -13  -3   1 <   50(22)     0.    180.00
 -12  -5  -5 <   26(13)     5.    180.00
 -12  -5  -4 <    5(10)     3.     0.00 
 -12  -5   0 <   21(16)     8.    180.00
 -12  -4  -4 <   15(13)     2.     0.00 
 -12  -4   1 <   33(10)     9.    180.00
 -12  -4   3 <   11(15)     1.    180.00
 -12  -4   4 <   34(19)     0.     0.00 
 -12  -3   1 <   26(9)      2.     0.00 
 -12  -3   3 <   33(16)     0.    180.00
 -12  -2   1 <   27(16)     0.     0.00 
 -12  -2   4 <   28(13)     4.    180.00
 -11  -7   0 <   17(10)     0.    180.00
 -11  -7   3 <   66(23)     1.    180.00
 -11  -6  -3 <   11(9)      1.     0.00 
 -11  -6   0 <   23(12)     5.     0.00 
 -11  -5  -5 <    5(8)      3.     0.00 
 -11  -5  -2 <    3(12)    19.     0.00 
 -11  -5  -1 <   36(10)    22.    180.00
 -11  -4  -4 <   18(11)     2.     0.00 
 -11  -4  -3 <   19(8)     16.    180.00
 -11  -4  -2 <   62(20)    32.    180.00
 -11  -3  -4 <   23(12)     6.    180.00
 -11  -3   0 <   13(7)      5.     0.00 
 -11  -3   2 <   17(10)     1.     0.00 
 -11  -2  -3 <   16(8)      4.    180.00
 -11  -2   1 <    9(10)     0.     0.00 
 -11  -2   2 <    7(7)      1.    180.00
 -11  -2   3 <    4(8)      5.    180.00
 -10  -7   1 <    8(8)      5.    180.00
 -10  -5  -1 <    4(7)      9.    180.00
 -10  -5   3 <   21(10)     3.    180.00
 -10  -4  -4 <   16(7)     12.    180.00
 -10  -4  -3 <   18(9)      5.    180.00
 -10  -4  -2 <    8(9)      0.    180.00
 -10  -4   0 <   19(9)     11.     0.00 
 -10  -4   1 <   19(7)     12.     0.00 
 -10  -4   3 <   28(13)    11.     0.00 
 -10  -3  -4 <    2(5)      0.     0.00 
 -10  -3  -3 <   26(9)     15.     0.00 
 -10  -3   3 <   12(11)     5.     0.00 
 -10  -2  -2 <   13(6)     13.     0.00 
 -10  -2   1 <   19(9)      8.     0.00 
 -10  -2   2 <   13(6)     11.    180.00
  -9  -5  -4 <   24(8)     15.     0.00 
  -9  -5  -3 <   18(6)     10.    180.00
  -9  -5  -2 <    7(8)      1.     0.00 
  -9  -5  -1 <   20(5)      1.     0.00 
  -9  -4  -1 <   21(9)      1.    180.00
  -9  -3  -4 <   11(6)      7.    180.00
  -9  -3  -1 o    2(5)      0.     0.00 
  -9  -2  -3 o    7(6)      3.     0.00 
  -9  -2  -1 o   14(4)      9.    180.00
  -9  -2   0 o   37(11)    47.     0.00 
  -9  -1   2 o    2(7)      3.    180.00
  -8  -5  -3 o   17(8)      1.     0.00 
  -8  -5  -2 o   12(6)      4.    180.00
  -8  -5   0 o   18(6)     13.    180.00
  -8  -4  -3 o    6(6)      3.    180.00
  -8  -4   1 o   18(6)      0.     0.00 
  -8  -4   2 o   11(6)     13.     0.00 
  -8  -3  -4 o   13(5)      4.     0.00 
  -8  -3  -2 o    7(5)      1.    180.00
  -8  -3  -1 o   15(5)      9.     0.00 
  -8  -3   0 o   10(5)      1.     0.00 
  -8  -3   3 o   19(6)      6.    180.00
  -8  -2  -3 o   20(5)     25.    180.00
  -8  -2   1 o   13(5)      6.     0.00 
  -8  -1   0 o   16(6)      5.    180.00
  -8  -1   2 o    4(5)      6.    180.00
  -7  -5   1 o   59(8)     14.     0.00 
  -7  -4  -3 o    9(6)      5.     0.00 
  -7  -4  -2 o    5(4)      1.     0.00 
  -7  -4  -1 o   15(5)     28.     0.00 
  -7  -4   0 o   67(8)     76.     0.00 
  -7  -4   1 o   11(5)      0.     0.00 
  -7  -4   2 o    7(5)     14.    180.00
  -7  -3  -3 o   6.5(35)    1.7    0.00 
  -7  -3   0 o    3(4)      1.    180.00
  -7  -2  -2 o   28(4)     25.     0.00 
  -7  -2   0 o   10(4)      1.    180.00
  -7  -2   1 o   15(4)     14.    180.00
  -7  -2   2 o   12(4)     18.     0.00 
  -7  -1  -2 o   38(5)     26.     0.00 
  -7  -1  -1 o   1.2(21)    1.8   180.00
  -7  -1   0 o   16(4)     16.     0.00 
  -7  -1   2 o   3.9(26)    9.8    0.00 
  -6  -4   0 o   2.9(20)    0.1   180.00
  -6  -4   1 o  10.1(35)    0.2   180.00
  -6  -3  -3 o  26.2(30)   22.0    0.00 
  -6  -3   0 o   8.5(30)    8.3    0.00 
  -6  -3   1 o   3.9(28)    0.0   180.00
  -6  -3   2 o   15(5)      9.     0.00 
  -6  -2  -2 o   5.2(22)    1.3    0.00 
  -6  -2  -1 o   56(4)     54.     0.00 
  -6  -2   1 o   5.0(19)    4.9    0.00 
  -6  -1  -2 o  34.5(33)   36.6   180.00
  -6  -1  -1 o  14.1(28)    7.4    0.00 
  -6  -1   1 o   22(4)     26.    180.00
  -6  -1   2 o   98(6)     106.    0.00 
  -5  -3  -3 o   108(4)    109.    0.00 
  -5  -3  -2 o  11.7(23)   13.1   180.00
  -5  -3  -1 o  33.9(34)   34.7    0.00 
  -5  -3   0 o  10.2(29)   14.3    0.00 
  -5  -3   1 o   87(4)     91.     0.00 
  -5  -2  -1 o  12.5(22)   15.2   180.00
  -5  -2   1 o  20.3(27)   23.5   180.00
  -5  -1  -2 o   7.4(17)    6.6   180.00
  -5  -1  -1 o   6.9(18)    7.1    0.00 
  -5  -1   0 o  68.7(28)   71.2   180.00
  -5  -1   1 o  19.7(22)   19.8   180.00
  -4  -2  -2 o   1.2(6)     0.2    0.00 
  -4  -2  -1 o  54.6(21)   50.9   180.00
  -4  -2   0 o  75.9(25)   71.3   180.00
  -4  -2   1 o   8.1(15)    9.4   180.00
  -4  -1  -1 o   1.4(5)     1.0    0.00 
  -4  -1   0 o  18.5(11)   18.6    0.00 
  -4  -1   1 o   2.0(6)     2.1   180.00
  -3  -2   0 o  106.2(21)  106.6  180.00
  -3  -1  -1 o   4.3(6)     3.9   180.00
  -3  -1   1 o  14.0(7)    13.3   180.00
  -2  -1  -1 o  47.2(15)   47.7    0.00 
  -2  -1   0 o  85.0(18)   84.3    0.00 
_reflns_number_total                   73
_reflns_limit_h_min                    -13
_reflns_limit_h_max                    -2
_reflns_limit_k_min                    -7
_reflns_limit_k_max                    -1
_reflns_limit_l_min                    -5
_reflns_limit_l_max                    4
_reflns_d_resolution_high              0.494
_reflns_d_resolution_low               2.998
data_UNOFA_s_28


loop_
      _refln_index_h
      _refln_index_k
      _refln_index_l
      _refln_observed_status
      _refln_F_squared_meas
      _refln_F_squared_calc
      _refln_phase_calc
 -12  -3 -10 <   21(15)    1.    0.00 
 -12  -3  -9 <   26(15)    0.   180.00
 -12  -2 -11 <   11(10)    1.   180.00
 -12  -2  -9 <   12(9)     1.   180.00
 -11  -6 -10 <   24(15)    2.   180.00
 -11  -5 -10 <   38(20)    6.   180.00
 -11  -5  -9 <   43(15)    1.    0.00 
 -11  -4 -13 <   48(20)    1.   180.00
 -11  -4 -12 <   25(10)    1.   180.00
 -11  -3 -15 <   17(14)    0.   180.00
 -11  -3 -14 <   11(11)    1.    0.00 
 -11  -2 -15 <   27(16)    0.    0.00 
 -11  -2 -13 <   26(13)    0.    0.00 
 -11  -2 -11 <    8(9)     0.    0.00 
 -10  -6 -13 <   52(18)    1.   180.00
 -10  -6 -12 <   14(9)     5.   180.00
 -10  -6 -11 <   35(12)    0.   180.00
 -10  -5 -17 <   46(18)   10.   180.00
 -10  -5 -14 <   31(13)    9.   180.00
 -10  -5 -13 <   14(9)     2.    0.00 
 -10  -5  -9 <   35(12)    2.    0.00 
 -10  -4 -19 <   49(18)    0.    0.00 
 -10  -4 -14 <   11(13)    0.   180.00
 -10  -4 -13 <   29(12)    1.   180.00
 -10  -4  -8 <   44(15)    6.    0.00 
 -10  -3 -19 <   12(13)    1.    0.00 
 -10  -3 -16 <    9(9)     0.   180.00
 -10  -3 -14 <   33(15)    0.   180.00
 -10  -3 -13 <   23(11)    2.    0.00 
 -10  -3 -11 <   27(10)    0.   180.00
 -10  -3  -9 <   17(13)    0.   180.00
 -10  -3  -8 <   19(13)    1.   180.00
 -10  -2 -14 <   14(14)    0.    0.00 
 -10  -2 -10 <    7(7)     3.   180.00
 -10  -2  -8 <   23(14)    2.   180.00
  -9  -5 -18 <   17(9)     8.    0.00 
  -9  -5 -17 <   21(9)    10.   180.00
  -9  -5 -16 <   23(12)   20.    0.00 
  -9  -5  -8 <   28(8)    18.   180.00
  -9  -4 -17 <   19(8)    11.   180.00
  -9  -4 -16 <   20(9)    21.   180.00
  -9  -4 -15 <   22(9)     0.    0.00 
  -9  -4 -14 <   22(9)     3.   180.00
  -9  -4  -8 <   26(12)   27.    0.00 
  -9  -3 -18 <   23(10)    9.   180.00
  -9  -3 -17 <   22(11)    4.   180.00
  -9  -3 -16 <   20(9)     3.    0.00 
  -9  -3 -12 <   21(9)     0.   180.00
  -9  -3  -9 <    8(5)     0.   180.00
  -9  -3  -7 <   16(6)     0.    0.00 
  -9  -2 -15 <   17(9)     4.    0.00 
  -9  -2 -14 <   11(6)     3.   180.00
  -9  -2 -10 <   16(6)    18.    0.00 
  -9  -2  -9 <   26(11)   31.    0.00 
  -8  -5 -18 <   18(6)    11.   180.00
  -8  -5 -15 <   22(10)    9.   180.00
  -8  -5 -14 <   13(9)     3.    0.00 
  -8  -5 -11 <    9(6)    18.   180.00
  -8  -5 -10 <   15(8)    20.    0.00 
  -8  -5  -9 <   19(9)     5.    0.00 
  -8  -4 -18 <   10(6)    10.   180.00
  -8  -4 -13 <   11(5)     0.   180.00
  -8  -4 -11 <   30(9)    33.    0.00 
  -8  -4 -10 <   11(8)    16.    0.00 
  -8  -4  -9 <   24(8)    20.    0.00 
  -8  -4  -8 <   37(8)    35.   180.00
  -8  -3 -17 <    8(6)    11.    0.00 
  -8  -3 -16 <    9(5)     7.    0.00 
  -8  -3 -14 <   18(5)     6.    0.00 
  -8  -3 -13 <   11(5)     7.   180.00
  -8  -3  -9 o   22(7)    15.   180.00
  -8  -3  -8 o    4(4)     3.   180.00
  -8  -3  -7 o   19(8)    18.   180.00
  -8  -2 -16 <   21(6)    19.    0.00 
  -8  -2 -15 <   14(5)    10.   180.00
  -8  -2 -13 <   23(7)     8.    0.00 
  -8  -2  -9 o   10(4)     4.    0.00 
  -8  -2  -6 o    6(6)     4.   180.00
  -8  -1 -14 <   38(10)   19.   180.00
  -8  -1 -13 <   27(8)    15.    0.00 
  -8  -1 -12 o   18(7)     4.    0.00 
  -8  -1  -7 o   17(4)    19.   180.00
  -8  -1  -6 o   62(7)    23.    0.00 
  -7  -4 -16 <   11(5)     6.    0.00 
  -7  -4 -15 <    4(4)     0.   180.00
  -7  -4 -14 <    9(4)     1.    0.00 
  -7  -4 -12 o    4(4)     5.    0.00 
  -7  -4 -11 o   13(5)     5.    0.00 
  -7  -4  -9 o   33(7)    32.   180.00
  -7  -4  -8 o   75(8)    74.   180.00
  -7  -4  -7 o    9(4)     8.   180.00
  -7  -3 -11 o   8.9(33)   9.1  180.00
  -7  -3 -10 o   11(6)     8.   180.00
  -7  -3  -9 o   6.5(32)   2.3  180.00
  -7  -3  -8 o   8.8(34)  13.7   0.00 
  -7  -2 -14 o   18(4)    11.    0.00 
  -7  -2 -13 o   9.5(34)   9.0  180.00
  -7  -2 -10 o  10.4(31)  12.1   0.00 
  -7  -2  -9 o  14.8(34)  11.2  180.00
  -7  -2  -7 o   36(6)    30.    0.00 
  -7  -2  -6 o   140(9)   126.  180.00
  -7  -1 -13 o   0.9(28)   0.3  180.00
  -7  -1 -12 o    8(5)     7.    0.00 
  -7  -1 -11 o    3(4)     1.    0.00 
  -7  -1  -9 o   29(5)    34.    0.00 
  -7  -1  -8 o   94(7)    83.   180.00
  -7  -1  -7 o  10.7(35)   9.6   0.00 
  -7  -1  -6 o   10(5)     0.    0.00 
  -7  -1  -5 o   41(5)    21.   180.00
  -6  -3 -13 o   2.1(23)   5.0   0.00 
  -6  -3 -12 o   8.8(29)   2.7   0.00 
  -6  -3  -9 o    5(4)     2.   180.00
  -6  -3  -7 o   24(4)    22.   180.00
  -6  -3  -6 o   2.5(25)   0.9  180.00
  -6  -2 -12 o   0.9(20)   0.2   0.00 
  -6  -2 -11 o   4.9(20)   3.4   0.00 
  -6  -2  -9 o   40(5)    38.   180.00
  -6  -2  -8 o   7.5(26)  12.1   0.00 
  -6  -2  -7 o  24.6(28)  20.0  180.00
  -6  -2  -5 o   85(5)    78.    0.00 
  -6  -1 -11 o   2.9(25)   2.3  180.00
  -6  -1  -9 o  22.2(30)  19.5  180.00
  -6  -1  -7 o   89(5)    107.   0.00 
  -6  -1  -5 o   71(4)    65.    0.00 
  -5  -3  -9 o   1.2(13)   1.6  180.00
  -5  -3  -7 o   50(4)    49.   180.00
  -5  -3  -6 o   38(4)    35.    0.00 
  -5  -2 -10 o   4.8(16)   6.8  180.00
  -5  -2  -7 o  66.6(34)  66.4   0.00 
  -5  -2  -6 o  57.8(35)  58.8   0.00 
  -5  -2  -5 o  63.8(33)  65.6   0.00 
  -5  -2  -4 o   0.3(10)   0.2   0.00 
  -5  -1 -10 o  51.4(30)  48.7  180.00
  -5  -1  -9 o  62.0(35)  55.7   0.00 
  -5  -1  -8 o   7.7(15)   5.1   0.00 
  -5  -1  -7 o   2.4(10)   1.7   0.00 
  -5  -1  -6 o   1.0(13)   0.6  180.00
  -5  -1  -5 o  26.3(27)  23.5  180.00
  -5  -1  -4 o  78.6(32)  75.5  180.00
  -4  -2  -9 o   99(4)    102.  180.00
  -4  -2  -8 o  11.2(18)  12.9   0.00 
  -4  -2  -7 o   8.5(16)  12.1   0.00 
  -4  -2  -6 o   3.1(10)   4.0   0.00 
  -4  -2  -5 o   1.3(7)    1.7   0.00 
  -4  -2  -4 o  13.6(17)  13.2  180.00
  -4  -1  -7 o   2.1(7)    1.8  180.00
  -4  -1  -6 o   3.1(8)    2.9  180.00
  -4  -1  -5 o  11.1(14)  11.6  180.00
  -4  -1  -4 o   2.1(9)    0.7  180.00
  -4  -1  -3 o  85.0(24)  86.8   0.00 
  -3  -1  -6 o   6.4(9)    6.9   0.00 
  -3  -1  -5 o   0.6(5)    1.2   0.00 
  -3  -1  -4 o   3.6(9)    5.3   0.00 
  -3  -1  -3 o  67.3(21)  70.1  180.00
  -2  -1  -4 o   1.2(5)    0.8  180.00
  -2  -1  -3 o   2.6(7)    3.8  180.00
  -2  -1  -2 o  32.9(15)  32.3  180.00
_reflns_number_total                   79
_reflns_limit_h_min                    -12
_reflns_limit_h_max                    -2
_reflns_limit_k_min                    -6
_reflns_limit_k_max                    -1
_reflns_limit_l_min                    -19
_reflns_limit_l_max                    -2
_reflns_d_resolution_high              0.505
_reflns_d_resolution_low               2.797
data_UNOFA_s_29


loop_
      _refln_index_h
      _refln_index_k
      _refln_index_l
      _refln_observed_status
      _refln_F_squared_meas
      _refln_F_squared_calc
      _refln_phase_calc
 -11  -4  23 <   12(10)    1.    0.00 
 -11  -3  21 <   19(12)    1.    0.00 
 -10  -5  21 <   45(19)    0.   180.00
 -10  -5  23 <   17(9)     0.   180.00
 -10  -4  19 <   32(11)    4.   180.00
 -10  -4  23 <   30(10)    0.   180.00
 -10  -3  18 <   15(7)     1.    0.00 
 -10  -3  21 <   17(8)     2.   180.00
 -10  -3  22 <   38(20)   13.   180.00
 -10  -3  23 <    6(10)    0.   180.00
 -10  -3  24 <   11(11)    8.   180.00
 -10  -2  22 <   10(11)    0.   180.00
 -10  -2  23 <   14(10)   12.    0.00 
 -10  -2  27 <   15(21)    6.   180.00
  -9  -7  19 <   10(8)     1.   180.00
  -9  -7  22 <    9(9)     0.   180.00
  -9  -6  15 <   14(8)     6.   180.00
  -9  -6  20 <   20(20)    1.    0.00 
  -9  -5  16 <    8(7)    20.    0.00 
  -9  -5  17 <   13(7)     9.    0.00 
  -9  -5  20 <    8(10)   11.   180.00
  -9  -5  22 <   18(13)    3.    0.00 
  -9  -5  24 <   15(15)    1.   180.00
  -9  -4  20 <   20(13)    0.   180.00
  -9  -3  17 <   23(9)     3.    0.00 
  -9  -3  20 <    7(10)    1.    0.00 
  -9  -3  21 <   22(11)    1.   180.00
  -9  -3  23 <   32(20)    2.   180.00
  -9  -3  25 <    9(14)   14.    0.00 
  -9  -2  19 <    8(9)     0.   180.00
  -9  -2  25 <    7(13)    0.   180.00
  -8  -7  20 <   51(15)    1.   180.00
  -8  -7  21 <   14(12)    0.    0.00 
  -8  -7  22 <   11(11)    1.    0.00 
  -8  -7  24 <   30(19)    0.    0.00 
  -8  -6  18 <   14(7)     0.   180.00
  -8  -6  21 <   29(13)   10.   180.00
  -8  -5  15 <   24(10)    8.    0.00 
  -8  -5  17 <   19(14)    5.   180.00
  -8  -5  19 <    1(7)     0.   180.00
  -8  -5  21 <   50(16)    0.    0.00 
  -8  -4  15 <   12(11)    4.   180.00
  -8  -4  18 <   15(7)     2.    0.00 
  -8  -3  14 o   44(7)    39.    0.00 
  -8  -3  15 <   32(11)    3.    0.00 
  -8  -3  19 <   55(12)   50.   180.00
  -8  -3  20 <   21(7)    22.   180.00
  -8  -2  15 o   11(6)     2.   180.00
  -8  -2  16 o    5(4)     3.   180.00
  -8  -2  19 <    9(11)   10.   180.00
  -7  -6  17 <   40(9)     9.    0.00 
  -7  -6  20 <   17(13)   11.   180.00
  -7  -5  13 o    9(4)     0.   180.00
  -7  -5  19 <    5(9)     3.   180.00
  -7  -5  20 <   11(6)     0.    0.00 
  -7  -4  13 o    8(6)    10.    0.00 
  -7  -4  14 o   18(5)    20.   180.00
  -7  -4  15 o   34(8)    26.    0.00 
  -7  -4  18 <   12(6)    10.   180.00
  -7  -4  19 <    6(8)     0.    0.00 
  -7  -4  20 <   18(9)    11.   180.00
  -7  -4  21 <   43(13)    2.   180.00
  -7  -3  12 o   35(7)    26.   180.00
  -7  -3  13 o   24(5)    17.    0.00 
  -7  -3  15 o   16(7)    18.    0.00 
  -7  -3  17 o    4(5)     8.   180.00
  -7  -3  18 o   25(6)    25.   180.00
  -7  -3  19 <   161(16)  167.  180.00
  -7  -2  12 o   2.4(25)   1.0  180.00
  -7  -2  13 o   33(7)    26.   180.00
  -7  -2  14 o   12(4)     1.   180.00
  -7  -2  15 o   12(6)    11.   180.00
  -7  -2  16 o   71(12)   62.   180.00
  -7  -2  17 o   56(9)    59.   180.00
  -7  -2  18 o   21(5)    16.    0.00 
  -7  -2  20 <   66(14)   61.    0.00 
  -6  -5  16 o   12(5)     7.   180.00
  -6  -4  13 o   21(6)    29.   180.00
  -6  -4  15 o    3(4)     0.    0.00 
  -6  -3  11 o   22(5)    14.   180.00
  -6  -3  13 o   12(5)    13.    0.00 
  -6  -3  14 o    8(5)     2.   180.00
  -6  -3  16 o   11(4)    14.   180.00
  -6  -3  18 o   68(12)   58.   180.00
  -6  -2  13 o   7.1(26)   7.6   0.00 
  -6  -2  15 o   11(5)     3.   180.00
  -6  -2  16 o   10(4)     1.   180.00
  -6  -1  14 o   32(5)    16.   180.00
  -6  -1  16 o   6.1(34)   6.6   0.00 
  -5  -4  12 o   12(4)    13.    0.00 
  -5  -3  11 o   39(6)    46.    0.00 
  -5  -3  13 o   26(6)    26.    0.00 
  -5  -3  14 o   19(5)     9.    0.00 
  -5  -3  15 o   18(5)    14.    0.00 
  -5  -2  10 o  23.7(31)  22.3   0.00 
  -5  -2  11 o  36.8(33)  38.1   0.00 
  -5  -2  12 o   28(4)    32.   180.00
  -5  -2  14 o   7.2(27)  12.2  180.00
  -5  -2  15 o   72(8)    19.   180.00
  -5  -1   9 o   2.8(9)    3.3  180.00
  -5  -1  12 o   3.5(24)   4.5  180.00
  -4  -3   8 o   102(4)   98.    0.00 
  -4  -3   9 o   2.8(14)   0.0  180.00
  -4  -3  10 o   92(5)    97.    0.00 
  -4  -3  11 o  11.1(27)   9.5   0.00 
  -4  -3  12 o   58(6)    65.    0.00 
  -4  -2   7 o   1.3(7)    0.0  180.00
  -4  -2   9 o   1.7(12)   1.1   0.00 
  -4  -2  10 o  26.1(31)  23.8  180.00
  -4  -2  11 o  12.5(26)  14.8  180.00
  -4  -2  12 o   119(7)   119.  180.00
  -4  -1   8 o   7.0(17)  11.7   0.00 
  -4  -1   9 o   3.0(12)   5.2  180.00
  -4  -1  10 o   1.0(8)    0.1   0.00 
  -3  -2   5 o   8.5(8)    7.8  180.00
  -3  -2   6 o  30.5(14)  28.3   0.00 
  -3  -2   8 o   2.4(8)    0.1   0.00 
  -3  -1   6 o   2.9(5)    2.5   0.00 
  -3  -1   7 o  43.7(16)  45.0   0.00 
  -3  -1   8 o   0.5(5)    0.0  180.00
  -2  -1   4 o  56.3(16)  56.7   0.00 
  -2  -1   5 o   5.9(6)    5.3  180.00
  -2  -1   6 o   8.2(6)    8.0  180.00
_reflns_number_total                   66
_reflns_limit_h_min                    -11
_reflns_limit_h_max                    -2
_reflns_limit_k_min                    -7
_reflns_limit_k_max                    -1
_reflns_limit_l_min                    4
_reflns_limit_l_max                    27
_reflns_d_resolution_high              0.494
_reflns_d_resolution_low               2.649
data_UNOFA_s_30


loop_
      _refln_index_h
      _refln_index_k
      _refln_index_l
      _refln_observed_status
      _refln_F_squared_meas
      _refln_F_squared_calc
      _refln_phase_calc
 -13  -3  10 <   33(16)    2.   180.00
 -12  -5   4 <   28(15)    0.    0.00 
 -12  -5   5 <   12(18)    0.   180.00
 -12  -5   7 <   16(20)    0.    0.00 
 -12  -5  11 <   17(11)    2.   180.00
 -12  -5  12 <   14(11)    1.   180.00
 -12  -4   7 <   15(10)    4.   180.00
 -12  -4   9 <    8(11)    0.    0.00 
 -12  -4  10 <   19(14)    3.   180.00
 -12  -3   8 <   16(9)     0.   180.00
 -12  -3  13 <   24(15)    1.   180.00
 -12  -3  14 <   73(21)    0.   180.00
 -12  -2   6 <   34(15)    1.   180.00
 -12  -2   8 <   99(18)   12.    0.00 
 -11  -6   3 <   18(11)    3.    0.00 
 -11  -6  10 <   36(15)    1.   180.00
 -11  -6  13 <   50(20)    0.    0.00 
 -11  -5   3 <   13(9)     1.    0.00 
 -11  -5   4 <    7(7)     3.   180.00
 -11  -5   6 <   31(12)   14.   180.00
 -11  -5   7 <   38(13)   18.    0.00 
 -11  -5  10 <    8(10)    9.    0.00 
 -11  -5  11 <   59(21)    4.   180.00
 -11  -5  15 <   43(18)    2.   180.00
 -11  -4   6 <   28(11)   16.    0.00 
 -11  -4   9 <   49(13)   25.   180.00
 -11  -4  14 <   20(10)    0.    0.00 
 -11  -3   4 <   13(9)     1.   180.00
 -11  -3   5 <   28(9)     2.   180.00
 -11  -3   7 <   32(10)    0.    0.00 
 -11  -2  12 <   15(8)     1.    0.00 
 -11  -2  15 <   13(9)     1.   180.00
 -10  -7  13 <   29(12)    1.   180.00
 -10  -6   7 <   19(16)    1.    0.00 
 -10  -6   8 <   12(8)     0.    0.00 
 -10  -6  10 <   10(8)     2.   180.00
 -10  -6  12 <   32(13)    8.    0.00 
 -10  -6  13 <   27(15)    2.   180.00
 -10  -5   4 <   22(6)     9.    0.00 
 -10  -5   6 <   26(7)    26.    0.00 
 -10  -5   7 <   36(11)   37.    0.00 
 -10  -5  11 <   66(18)    2.   180.00
 -10  -5  13 <   33(13)    4.   180.00
 -10  -4   3 <   12(5)    11.    0.00 
 -10  -4   4 <    9(5)     7.    0.00 
 -10  -4   5 <   24(12)   15.    0.00 
 -10  -4   6 <   11(6)    10.   180.00
 -10  -4   8 <   14(7)    22.   180.00
 -10  -4   9 <   52(13)   40.   180.00
 -10  -4  14 <   13(8)     2.    0.00 
 -10  -3   9 <   20(9)     2.    0.00 
 -10  -3  10 <   10(7)     1.    0.00 
 -10  -3  11 <    8(12)    1.    0.00 
 -10  -2   4 <    5(5)     0.   180.00
 -10  -2   5 <   12(5)     5.    0.00 
 -10  -2   6 <   19(9)     1.   180.00
 -10  -2   8 <    5(9)     3.   180.00
 -10  -2   9 <   20(9)     7.   180.00
 -10  -2  12 <   14(7)     1.    0.00 
 -10  -2  13 <   14(6)     3.    0.00 
  -9  -6  10 <   71(18)   29.   180.00
  -9  -6  11 <   16(7)    11.    0.00 
  -9  -5   3 <   10(5)     0.   180.00
  -9  -5   5 <    8(5)     4.    0.00 
  -9  -5   6 <   16(8)     1.    0.00 
  -9  -5  11 <   10(7)     8.   180.00
  -9  -5  12 <   10(7)     0.    0.00 
  -9  -4   3 <    9(4)     6.    0.00 
  -9  -4   5 <   11(8)     7.   180.00
  -9  -4   6 <   23(7)    15.   180.00
  -9  -4   7 <    3(5)     6.   180.00
  -9  -4   9 <   21(9)     3.    0.00 
  -9  -3   5 o    5(4)     2.    0.00 
  -9  -3   6 o    9(6)     9.    0.00 
  -9  -3   9 <   16(9)     1.   180.00
  -9  -2   5 o   18(8)     0.   180.00
  -9  -2   8 o   67(12)   48.   180.00
  -9  -2  12 <   23(9)    23.    0.00 
  -8  -5   8 <    4(5)     2.   180.00
  -8  -5   9 <   17(7)     2.    0.00 
  -8  -4   2 o   12(6)    13.    0.00 
  -8  -4   3 o   6.2(34)   4.4   0.00 
  -8  -4   5 o   13(5)     7.   180.00
  -8  -4  11 o   15(7)     8.    0.00 
  -8  -3   3 o    6(4)     6.   180.00
  -8  -3   4 o    9(4)     5.    0.00 
  -8  -3   6 o   12(4)     8.    0.00 
  -8  -3   7 o    6(4)     7.   180.00
  -8  -3   8 o   20(5)    16.   180.00
  -8  -3  10 o   47(8)    40.   180.00
  -8  -2   3 o   6.3(32)   3.9  180.00
  -8  -2   4 o   17(5)    12.   180.00
  -8  -2   5 o   21(4)    20.   180.00
  -8  -2   6 o   0.8(28)   0.9  180.00
  -8  -2   7 o   26(6)    31.   180.00
  -8  -2   9 o   69(8)    64.    0.00 
  -8  -2  10 o   11(5)    18.    0.00 
  -8  -2  11 o   31(5)    32.    0.00 
  -7  -4   3 o    8(4)     5.   180.00
  -7  -4   4 o   26(5)    25.   180.00
  -7  -4   6 o   8.6(29)   4.6  180.00
  -7  -4   7 o    4(4)     0.   180.00
  -7  -4   8 o    7(5)     1.   180.00
  -7  -3   6 o   0.9(21)   0.1   0.00 
  -7  -3   7 o   7.2(28)   9.6  180.00
  -7  -3   8 o   12(5)     9.    0.00 
  -7  -3   9 o   18(5)    13.   180.00
  -7  -3  10 o   43(5)    26.    0.00 
  -7  -2   3 o   2.9(16)   3.3  180.00
  -7  -2   6 o   6.5(30)  11.6  180.00
  -7  -2   9 o   54(5)    48.    0.00 
  -7  -2  10 o    9(4)     0.   180.00
  -6  -3   2 o   7.0(18)   8.7   0.00 
  -6  -3   3 o   6.6(16)  17.6   0.00 
  -6  -3   4 o   18(4)    18.    0.00 
  -6  -3   5 o  20.5(25)  26.9  180.00
  -6  -3   6 o   21(4)    16.   180.00
  -6  -3   8 o   8.2(27)   3.4  180.00
  -6  -2   3 o   69(4)    64.   180.00
  -6  -2   4 o   3.9(21)   0.7  180.00
  -6  -2   5 o   7.3(21)   7.1  180.00
  -6  -2   7 o   1.4(21)   7.5   0.00 
  -6  -1   3 o   150(5)   141.  180.00
  -6  -1   4 o  50.1(33)  35.2  180.00
  -6  -1   5 o  19.7(25)  11.6   0.00 
  -6  -1   6 o  12.5(24)   4.3  180.00
  -5  -3   3 o  13.1(24)   7.8  180.00
  -5  -3   4 o  12.8(25)   9.1  180.00
  -5  -3   5 o   76(4)    71.   180.00
  -5  -3   6 o  22.4(25)  22.7   0.00 
  -5  -2   2 o   124(4)   132.  180.00
  -5  -2   3 o  93.6(33)  90.5  180.00
  -5  -2   4 o   8.0(17)   6.1   0.00 
  -5  -2   5 o   3.7(11)   3.5   0.00 
  -5  -2   6 o   91(4)    88.    0.00 
  -5  -2   7 o   177(5)   161.   0.00 
  -5  -1   2 o   2.4(9)    4.5   0.00 
  -5  -1   3 o  42.6(22)  43.4   0.00 
  -5  -1   4 o  71.2(28)  63.6   0.00 
  -5  -1   5 o   4.2(14)   3.1   0.00 
  -5  -1   6 o   0.8(11)   0.0  180.00
  -5  -1   7 o   8.7(13)   6.6  180.00
  -4  -2   1 o   7.3(15)   9.4  180.00
  -4  -2   2 o  13.7(13)  13.0  180.00
  -4  -2   3 o  58.1(23)  60.4   0.00 
  -4  -2   4 o   256(5)   274.   0.00 
  -4  -2   5 o   9.6(13)  10.4  180.00
  -4  -1   3 o  17.8(14)  17.9   0.00 
  -4  -1   4 o  20.5(17)  18.8  180.00
  -4  -1   5 o   8.9(9)    9.1  180.00
  -3  -2   4 o  14.0(9)   13.0   0.00 
  -3  -1   1 o  12.7(10)  13.3  180.00
  -3  -1   2 o   1.8(7)    0.9  180.00
  -3  -1   3 o  50.5(21)  51.9  180.00
  -2  -1   2 o   1.2(7)    3.5  180.00
_reflns_number_total                   79
_reflns_limit_h_min                    -13
_reflns_limit_h_max                    -2
_reflns_limit_k_min                    -7
_reflns_limit_k_max                    -1
_reflns_limit_l_min                    1
_reflns_limit_l_max                    15
_reflns_d_resolution_high              0.497
_reflns_d_resolution_low               2.934
data_UNOFA_s_31


loop_
      _refln_index_h
      _refln_index_k
      _refln_index_l
      _refln_observed_status
      _refln_F_squared_meas
      _refln_F_squared_calc
      _refln_phase_calc
  -5  -3  36 <   10(9)     0.    0.00 
  -5  -2  35 <   10(8)     0.   180.00
  -4  -5  32 <   32(14)   31.    0.00 
  -4  -5  33 <   23(10)   19.   180.00
  -4  -5  34 <   13(14)    6.    0.00 
  -4  -4  32 <    5(8)    11.    0.00 
  -4  -4  33 <    4(12)   16.    0.00 
  -4  -3  31 <   27(10)    6.    0.00 
  -4  -3  35 <   19(9)     5.   180.00
  -4  -2  31 <    7(7)     8.    0.00 
  -4  -2  32 <   37(13)    0.    0.00 
  -4  -2  33 <   12(8)    13.    0.00 
  -3  -6  31 <   11(12)    1.    0.00 
  -3  -5  30 <   41(9)    15.   180.00
  -3  -4  23 o    2(6)     3.    0.00 
  -3  -4  29 <   28(12)   22.    0.00 
  -3  -4  29 <   27(10)   22.    0.00 
  -3  -4  30 <   52(12)   25.    0.00 
  -3  -4  32 <   38(16)   27.    0.00 
  -3  -3  26 <   22(9)     0.    0.00 
  -3  -3  28 <   15(6)     1.    0.00 
  -3  -3  30 <   12(6)     0.    0.00 
  -3  -3  31 <   17(10)    0.   180.00
  -3  -3  32 <   13(10)    7.   180.00
  -3  -3  36 <   28(10)    0.    0.00 
  -3  -2  28 <    9(7)     2.    0.00 
  -3  -2  29 <    8(8)     3.    0.00 
  -3  -2  31 <   20(10)    6.   180.00
  -3  -2  33 <   36(13)   17.   180.00
  -3  -2  36 <   24(15)    1.   180.00
  -3  -1  23 o   5.0(29)   4.8   0.00 
  -3  -1  24 o    7(5)    10.   180.00
  -3  -1  26 o   14(6)    13.   180.00
  -3  -1  27 <    7(7)     3.   180.00
  -3  -1  30 <   32(11)   14.    0.00 
  -3  -1  33 <   22(8)     0.    0.00 
  -3  -1  34 <   32(12)   15.   180.00
  -3  -1  37 <   45(21)    4.   180.00
  -2  -5  25 <   13(6)    18.    0.00 
  -2  -5  26 <   18(6)     7.   180.00
  -2  -5  30 <   31(12)   12.    0.00 
  -2  -4  23 o   12(5)     0.    0.00 
  -2  -4  28 <   20(10)    7.    0.00 
  -2  -4  29 <    3(7)     0.   180.00
  -2  -4  32 <   20(9)     2.   180.00
  -2  -3  16 o  21.5(33)  21.8   0.00 
  -2  -3  19 o    7(4)     7.    0.00 
  -2  -3  21 o   17(5)    17.   180.00
  -2  -3  22 o    5(6)     3.   180.00
  -2  -3  23 o    5(6)     6.    0.00 
  -2  -3  34 <   15(15)    0.    0.00 
  -2  -3  34 <   13(13)    0.    0.00 
  -2  -3  36 <   19(11)    0.    0.00 
  -2  -3  37 <   18(12)    0.   180.00
  -2  -2  15 o   9.7(16)   6.6   0.00 
  -2  -2  16 o  21.5(28)  25.0   0.00 
  -2  -2  17 o   3.3(19)   1.3   0.00 
  -2  -2  21 o   5.9(31)   9.9   0.00 
  -2  -2  25 o   12(7)    13.   180.00
  -2  -2  26 o   10(6)     0.   180.00
  -2  -2  27 <    5(8)    13.   180.00
  -2  -2  29 <   28(12)    3.    0.00 
  -2  -2  31 <   52(15)    5.    0.00 
  -2  -2  36 <   27(15)    1.    0.00 
  -2  -1  15 o  34.6(27)  32.3   0.00 
  -2  -1  16 o   136(5)   130.   0.00 
  -2  -1  17 o   6.7(18)   3.5   0.00 
  -2  -1  18 o   47(4)    37.    0.00 
  -2  -1  20 o   9.1(32)   9.8  180.00
  -2  -1  23 o   39(7)    28.   180.00
  -2  -1  24 o   50(8)    56.   180.00
  -2  -1  26 o    7(7)     1.   180.00
  -2  -1  32 <   32(12)   21.    0.00 
  -2  -1  36 <   36(19)    2.   180.00
  -2  -1  38 <   86(28)    0.    0.00 
  -1  -6  34 <   22(17)    2.   180.00
  -1  -5  25 <   18(10)   21.   180.00
  -1  -5  29 <   30(21)    6.    0.00 
  -1  -5  30 <   11(8)     4.   180.00
  -1  -5  32 <   20(14)    0.   180.00
  -1  -5  35 <   29(13)    0.    0.00 
  -1  -4  19 o   16(4)    12.   180.00
  -1  -4  20 o    5(4)     9.   180.00
  -1  -4  23 o   42(8)    45.   180.00
  -1  -4  24 o   29(8)    28.   180.00
  -1  -4  26 <   36(8)    40.   180.00
  -1  -4  27 <   56(13)   38.    0.00 
  -1  -4  29 <    4(7)     0.   180.00
  -1  -4  32 <   82(19)    0.   180.00
  -1  -4  35 <   84(25)    1.   180.00
  -1  -3  15 o  23.7(30)  23.4   0.00 
  -1  -3  16 o   5.8(22)   7.3  180.00
  -1  -3  18 o   71(7)    71.   180.00
  -1  -3  19 o    6(4)     2.   180.00
  -1  -3  24 o    7(5)     1.   180.00
  -1  -3  26 o   11(5)     6.    0.00 
  -1  -3  30 <   41(13)    2.    0.00 
  -1  -2  10 o   1.7(5)    0.2  180.00
  -1  -2  12 o   3.6(9)    3.5  180.00
  -1  -2  13 o  16.0(18)  19.1   0.00 
  -1  -2  15 o  11.3(24)  13.3   0.00 
  -1  -2  16 o   34(4)    42.    0.00 
  -1  -2  17 o   46(5)    44.   180.00
  -1  -2  19 o   24(6)    25.   180.00
  -1  -2  20 o   3.6(27)   0.6  180.00
  -1  -2  23 o    8(5)     0.   180.00
  -1  -2  25 o    9(6)     1.   180.00
  -1  -2  27 o   12(8)    19.    0.00 
  -1  -1   8 o  32.9(13)  32.3   0.00 
  -1  -1   9 o  43.8(15)  43.8   0.00 
  -1  -1  10 o   3.0(6)    3.2  180.00
  -1  -1  11 o   9.0(10)   8.3  180.00
  -1  -1  12 o   7.6(13)   8.7  180.00
  -1  -1  13 o  23.5(18)  23.7   0.00 
  -1  -1  15 o  25.6(26)  26.5   0.00 
  -1  -1  16 o  16.1(30)  21.6   0.00 
  -1  -1  17 o   73(6)    73.   180.00
  -1  -1  18 o   16(4)    20.    0.00 
  -1  -1  19 o   9.9(27)  19.9   0.00 
  -1  -1  20 o   11(4)     6.   180.00
  -1  -1  21 o   10(4)    11.   180.00
  -1  -1  22 o    4(4)    18.   180.00
_reflns_number_total                   59
_reflns_limit_h_min                    -5
_reflns_limit_h_max                    -1
_reflns_limit_k_min                    -6
_reflns_limit_k_max                    -1
_reflns_limit_l_min                    8
_reflns_limit_l_max                    38
_reflns_d_resolution_high              0.502
_reflns_d_resolution_low               2.214
data_UNOFA_s_32


loop_
      _refln_index_h
      _refln_index_k
      _refln_index_l
      _refln_observed_status
      _refln_F_squared_meas
      _refln_F_squared_calc
      _refln_phase_calc
  -9  -6  26 <   10(9)      0.     0.00 
  -9  -4  28 <   12(12)     2.    180.00
  -8  -5  25 <   20(11)     0.    180.00
  -8  -5  29 <   13(9)      0.     0.00 
  -8  -5  30 <   31(10)     0.    180.00
  -8  -4  25 <   30(14)     0.    180.00
  -8  -4  27 <   16(9)      9.    180.00
  -8  -4  31 <   24(15)     0.    180.00
  -8  -2  26 <   16(10)     4.    180.00
  -8  -2  28 <   15(12)     1.     0.00 
  -8  -2  28 <   19(12)     1.     0.00 
  -7  -6  25 <   18(8)      0.     0.00 
  -7  -6  26 <   14(10)     0.    180.00
  -7  -6  28 <   24(15)     1.     0.00 
  -7  -5  22 <    5(6)      1.    180.00
  -7  -5  28 <    6(8)      0.     0.00 
  -7  -4  22 <   16(6)     16.     0.00 
  -7  -4  23 <   21(9)      0.    180.00
  -7  -4  31 <   42(15)     0.     0.00 
  -7  -4  32 <   31(11)     0.     0.00 
  -7  -4  32 <   20(14)     0.     0.00 
  -7  -3  21 <   27(8)     23.    180.00
  -7  -3  22 <   23(8)     15.     0.00 
  -7  -3  23 <   18(11)    12.     0.00 
  -7  -3  28 <   15(9)      1.    180.00
  -7  -2  21 <   96(8)     80.     0.00 
  -7  -2  22 <    7(5)     13.    180.00
  -7  -2  27 <   10(7)      4.    180.00
  -7  -2  29 <   17(13)    13.    180.00
  -7  -2  32 <   19(15)     0.    180.00
  -7  -2  34 <   10(11)     0.     0.00 
  -6  -6  27 <   19(13)     3.     0.00 
  -6  -6  30 <   45(17)    15.    180.00
  -6  -6  31 <   35(15)     2.    180.00
  -6  -5  20 <   18(5)     15.     0.00 
  -6  -5  21 <   20(6)     22.     0.00 
  -6  -5  23 <    6(6)      7.    180.00
  -6  -5  27 <   16(8)      7.     0.00 
  -6  -4  18 o   7.7(31)    6.3   180.00
  -6  -4  19 o    9(6)      6.     0.00 
  -6  -4  20 <   16(4)     18.    180.00
  -6  -4  21 <   18(5)     24.     0.00 
  -6  -4  28 <    7(8)      0.     0.00 
  -6  -3  18 o   61(7)     58.    180.00
  -6  -3  19 o   93(7)     86.     0.00 
  -6  -3  20 o    4(5)      1.    180.00
  -6  -3  22 <   29(9)     32.     0.00 
  -6  -3  23 <   20(8)     24.    180.00
  -6  -3  24 <   40(14)    12.     0.00 
  -6  -3  26 <   16(9)      9.     0.00 
  -6  -3  27 <   18(10)    17.    180.00
  -6  -3  28 <   24(9)     25.    180.00
  -6  -3  30 <   63(18)    29.    180.00
  -6  -3  33 <   21(11)     0.    180.00
  -6  -3  35 <   56(21)     1.     0.00 
  -6  -2  18 o   26(6)     29.     0.00 
  -6  -2  19 o    4(4)      0.    180.00
  -6  -2  20 o   43(6)     34.     0.00 
  -6  -2  21 o   13(4)      9.    180.00
  -6  -2  25 <   25(9)      6.    180.00
  -6  -2  27 <   17(10)     0.    180.00
  -6  -2  29 <   21(8)     31.     0.00 
  -6  -2  32 <   14(13)     7.     0.00 
  -5  -6  26 <   22(12)     0.     0.00 
  -5  -6  27 <   43(18)    27.    180.00
  -5  -6  28 <   22(8)     17.    180.00
  -5  -6  29 <   27(13)    25.    180.00
  -5  -6  30 <   177(24)    8.    180.00
  -5  -5  21 <    3(5)      8.     0.00 
  -5  -5  22 <   75(11)    67.    180.00
  -5  -5  23 <   13(6)      9.     0.00 
  -5  -5  27 <   23(7)     11.    180.00
  -5  -5  29 <   22(15)     0.    180.00
  -5  -5  29 <   28(12)     0.    180.00
  -5  -5  30 <   46(13)    16.     0.00 
  -5  -4  22 <    8(4)      1.    180.00
  -5  -4  26 <   19(12)     2.    180.00
  -5  -3  15 o  13.6(29)   14.2    0.00 
  -5  -3  16 o   17(4)     11.    180.00
  -5  -3  17 o   9.2(24)   10.5   180.00
  -5  -3  19 o   8.2(28)   12.9    0.00 
  -5  -3  21 o   10(6)     15.     0.00 
  -5  -3  28 <   17(10)     6.     0.00 
  -5  -3  29 <   21(11)     7.    180.00
  -5  -2  15 o   30(4)     19.    180.00
  -5  -2  16 o   5.2(19)    7.9    0.00 
  -5  -2  18 o   9.9(33)    3.5   180.00
  -5  -2  22 o    1(4)     13.     0.00 
  -5  -2  24 o   10(4)      2.    180.00
  -5  -2  26 <    5(5)      0.     0.00 
  -5  -2  29 <    8(7)      1.     0.00 
  -4  -5  23 <   16(8)     13.     0.00 
  -4  -5  24 <   24(8)     23.    180.00
  -4  -4  17 o   9.2(34)    5.6   180.00
  -4  -4  22 o   30(6)     14.    180.00
  -4  -3  12 o   81(4)     65.     0.00 
  -4  -3  13 o   135(5)    130.   180.00
  -4  -3  14 o  17.0(27)   17.3   180.00
  -4  -3  16 o  14.3(33)   13.7   180.00
  -4  -3  17 o   6.4(21)   10.1    0.00 
  -4  -3  20 o    3(4)      5.     0.00 
  -4  -2  12 o   116(4)    119.   180.00
  -4  -2  14 o  30.3(26)   32.8   180.00
  -4  -2  15 o  20.2(23)   21.4    0.00 
  -4  -2  17 o   7.5(31)    5.4    0.00 
  -4  -2  18 o   16(4)     14.     0.00 
  -4  -2  19 o    8(4)      0.    180.00
  -4  -2  20 o   6.4(35)    0.1    0.00 
  -4  -1  12 o  11.5(22)    8.2   180.00
  -4  -1  13 o   8.3(20)   11.6    0.00 
  -4  -1  14 o   86(4)     88.     0.00 
  -4  -1  15 o  42.0(30)   27.4   180.00
  -4  -1  16 o   6.2(25)    8.1   180.00
  -4  -1  19 o  15.1(34)    9.6    0.00 
  -3  -3  13 o   111(4)    109.   180.00
  -3  -3  14 o  18.8(24)   15.5    0.00 
  -3  -3  15 o   49(4)     50.    180.00
  -3  -3  16 o   23(4)     16.     0.00 
  -3  -2   9 o   0.4(5)     0.2    0.00 
  -3  -2  10 o  32.0(22)   31.0   180.00
  -3  -2  11 o  45.9(27)   46.1   180.00
  -3  -2  12 o  62.3(29)   58.6    0.00 
  -3  -2  13 o   1.3(13)    0.5    0.00 
  -3  -2  15 o  27.2(25)   27.0    0.00 
  -3  -2  16 o   82(4)     81.    180.00
  -3  -2  17 o   4.4(23)    5.8   180.00
  -3  -2  18 o   26(4)     12.     0.00 
  -3  -1   9 o  19.8(13)   20.4   180.00
  -3  -1  10 o   0.7(6)     1.5    0.00 
  -3  -1  12 o  22.6(17)   25.1   180.00
  -3  -1  13 o  102.4(34)  101.3  180.00
  -3  -1  14 o  11.3(20)   10.9   180.00
  -3  -1  15 o  53.7(29)   57.8   180.00
  -3  -1  16 o   5.7(22)    8.8    0.00 
  -2  -2   9 o  28.4(17)   26.4   180.00
  -2  -2  10 o   0.5(10)    2.0   180.00
  -2  -2  11 o   2.4(6)     4.5   180.00
  -2  -2  12 o   2.0(9)     2.1    0.00 
  -2  -1   6 o   5.6(8)     8.0   180.00
  -2  -1   7 o   2.0(7)     2.2    0.00 
  -2  -1   8 o  107.2(30)  113.0  180.00
  -2  -1   9 o  23.2(17)   21.6    0.00 
  -2  -1  10 o  12.3(12)   11.2   180.00
  -2  -1  11 o  18.0(13)   18.5   180.00
  -1  -1   5 o   0.73(33)   0.76  180.00
  -1  -1   6 o   6.2(9)     6.2    0.00 
_reflns_number_total                   72
_reflns_limit_h_min                    -9
_reflns_limit_h_max                    -1
_reflns_limit_k_min                    -6
_reflns_limit_k_max                    -1
_reflns_limit_l_min                    5
_reflns_limit_l_max                    35
_reflns_d_resolution_high              0.496
_reflns_d_resolution_low               3.101
data_UNOFA_s_33


loop_
      _refln_index_h
      _refln_index_k
      _refln_index_l
      _refln_observed_status
      _refln_F_squared_meas
      _refln_F_squared_calc
      _refln_phase_calc
   1  -1   6 o  15.0(8)    13.9   180.00
   1  -1   7 o  70.1(18)   68.6   180.00
   1  -1   8 o   4.0(5)     3.9   180.00
   1   0   5 o  160.7(24)  155.5  180.00
   1   0   7 o  10.3(6)     6.6   180.00
   2  -2  11 o  56.2(25)   62.1   180.00
   2  -2  13 o  22.2(20)   22.1    0.00 
   2  -2  14 o   61(4)     60.    180.00
   2  -2  15 o  28.1(29)   28.2    0.00 
   2  -1   8 o   4.8(8)     5.6    0.00 
   2  -1   9 o   0.6(4)     0.5   180.00
   2  -1  10 o  24.6(16)   23.9    0.00 
   2  -1  11 o  31.7(19)   33.0    0.00 
   2  -1  12 o  14.9(15)   16.8   180.00
   2  -1  13 o  28.0(19)   32.0    0.00 
   2  -1  14 o  78.0(33)   82.0   180.00
   2  -1  16 o  12.0(20)   13.3    0.00 
   2   0  10 o  18.6(14)   17.3   180.00
   2   0  11 <   1.3(7)     0.0    0.00 
   2   0  12 o   1.4(6)     1.6    0.00 
   2   0  15 <   4.7(17)    0.0    0.00 
   3  -3  17 o   4.8(24)    5.1   180.00
   3  -3  20 o   30(6)     36.     0.00 
   3  -3  21 o   48(10)    11.     0.00 
   3  -2  12 o   68(5)     68.     0.00 
   3  -2  13 o   8.8(24)    9.6   180.00
   3  -2  14 o  17.3(28)   20.5    0.00 
   3  -2  16 o   6.2(28)    6.0   180.00
   3  -2  17 o   4.2(21)    0.4    0.00 
   3  -2  18 o   15(6)     17.    180.00
   3  -2  19 o   6.9(29)    7.7    0.00 
   3  -2  20 o   18(4)     25.    180.00
   3  -2  21 o    8(4)     12.     0.00 
   3  -2  24 o   20(6)     14.     0.00 
   3  -2  25 <    9(5)     11.    180.00
   3  -1  12 o  16.6(30)   20.2    0.00 
   3  -1  13 o   38(4)     42.     0.00 
   3  -1  14 o   95(5)     102.   180.00
   3  -1  15 o   21(4)     24.    180.00
   3  -1  16 o    8(4)      5.    180.00
   3  -1  18 o    8(4)      0.    180.00
   3  -1  19 o   13(4)     10.     0.00 
   3  -1  20 o    7(4)      0.    180.00
   3  -1  21 o  11.8(35)   12.9   180.00
   3  -1  22 o   45(9)     47.     0.00 
   3  -1  23 o   72(12)    17.    180.00
   3  -1  25 o    7(6)      8.    180.00
   3   0  13 o   3.1(19)    3.8   180.00
   3   0  15 o   7.6(24)    8.0   180.00
   3   0  18 <   3.6(32)    0.0    0.00 
   3   0  21 o   21(7)     13.    180.00
   4  -4  22 <    9(6)      0.     0.00 
   4  -4  30 <   19(7)      2.    180.00
   4  -4  32 <   13(17)     0.    180.00
   4  -3  15 o   6.6(23)    1.3   180.00
   4  -3  29 <   18(10)     3.     0.00 
   4  -3  29 <   26(12)     3.     0.00 
   4  -2  15 o   44(6)     36.    180.00
   4  -2  21 o   30(7)     31.     0.00 
   4  -2  23 o   53(9)     63.     0.00 
   4  -2  26 <   22(8)      9.    180.00
   4  -2  31 <   19(10)     0.    180.00
   4  -2  33 <   25(10)     8.     0.00 
   4  -1  19 o   29(5)     34.     0.00 
   4  -1  21 o   49(8)     48.     0.00 
   4  -1  22 o    9(4)      0.    180.00
   4  -1  24 <   11(7)      1.    180.00
   4   0  18 o   13(5)     27.    180.00
   4   0  19 <    8(5)      0.     0.00 
   4   0  22 o    6(5)     19.     0.00 
   4   0  24 o   10(6)      6.    180.00
   4   0  30 <    7(6)      4.     0.00 
   5  -5  29 <   27(10)     0.     0.00 
   5  -4  22 <   21(6)     35.     0.00 
   5  -4  23 <    9(6)      8.    180.00
   5  -4  27 <    1(8)      7.     0.00 
   5  -4  32 <   32(18)     0.    180.00
   5  -3  19 o   33(9)      5.    180.00
   5  -3  21 <    5(5)      0.     0.00 
   5  -3  22 <   34(9)     18.     0.00 
   5  -3  23 <   33(7)     27.     0.00 
   5  -3  24 <   10(11)    19.    180.00
   5  -3  26 <    9(12)     0.    180.00
   5  -3  29 <   17(12)     0.    180.00
   5  -3  31 <   19(13)     4.    180.00
   5  -3  32 <   25(15)     4.     0.00 
   5  -2  19 o   30(7)     22.     0.00 
   5  -2  20 o   69(7)     96.     0.00 
   5  -2  23 <    8(6)     14.    180.00
   5  -2  24 <   27(9)     16.    180.00
   5  -2  32 <   29(13)     4.     0.00 
   5  -2  33 <   12(8)      4.     0.00 
   5  -1  22 o   48(13)    49.    180.00
   5  -1  24 <   12(8)     10.    180.00
   5  -1  28 <    8(10)     0.    180.00
   5  -1  27 <    7(7)      0.    180.00
   5  -1  32 <   48(15)     0.     0.00 
   5   0  22 <    2(5)      0.     0.00 
   5   0  23 <   20(12)     6.    180.00
   6  -5  24 <   31(15)    15.    180.00
   6  -5  25 <   20(9)      7.    180.00
   6  -5  26 <    8(11)     1.    180.00
   6  -4  23 <   34(13)    30.    180.00
   6  -4  24 <   37(12)    15.     0.00 
   6  -4  25 <  100(20)    35.    180.00
   6  -3  23 <   36(11)    20.    180.00
   6  -3  30 <    1(10)     1.    180.00
   6  -2  24 <    9(11)     3.    180.00
   6  -2  26 <   12(8)      1.     0.00 
   6  -2  27 <    3(9)      5.    180.00
   6  -2  29 <   21(13)    11.     0.00 
   6  -2  30 <   22(10)     3.     0.00 
   7  -5  27 <   10(14)     2.    180.00
   7  -4  28 <    7(15)     0.     0.00 
   7  -2  30 <   26(13)     0.    180.00
   7   0  30 <   107(19)    0.     0.00 
_reflns_number_total                   61
_reflns_limit_h_min                    1
_reflns_limit_h_max                    7
_reflns_limit_k_min                    -5
_reflns_limit_k_max                    0
_reflns_limit_l_min                    5
_reflns_limit_l_max                    33
_reflns_d_resolution_high              0.507
_reflns_d_resolution_low               3.220
data_UNOFA_s_34


loop_
      _refln_index_h
      _refln_index_k
      _refln_index_l
      _refln_observed_status
      _refln_F_squared_meas
      _refln_F_squared_calc
      _refln_phase_calc
  -1  -5  35 <   29(11)     0.     0.00 
  -1  -4  27 <   34(6)     38.     0.00 
  -1  -4  28 <   13(5)     12.     0.00 
  -1  -4  29 <    9(6)      0.    180.00
  -1  -4  37 <   15(14)     1.    180.00
  -1  -3  28 <   10(4)      4.     0.00 
  -1  -3  30 <   10(7)      2.     0.00 
  -1  -3  31 <    3(6)      0.     0.00 
  -1  -3  32 <   13(9)      0.     0.00 
  -1  -3  34 <   16(9)      0.    180.00
  -1  -2  27 o   16(5)     19.     0.00 
  -1  -2  31 <   20(10)     0.    180.00
  -1  -2  33 <   11(5)      2.     0.00 
  -1  -2  36 <   31(14)     0.     0.00 
  -1  -1  25 o    7(6)      7.     0.00 
  -1  -1  26 o   26(7)     20.     0.00 
  -1  -1  27 o    4(4)      4.     0.00 
  -1  -1  28 <   27(6)     23.     0.00 
   0  -5  30 <    5(8)      1.    180.00
   0  -5  34 <   23(8)      0.     0.00 
   0  -5  36 <   25(13)     3.    180.00
   0  -4  24 o    4(4)      8.     0.00 
   0  -4  25 o   40(8)     44.     0.00 
   0  -4  26 <   50(8)     45.     0.00 
   0  -4  27 <   63(10)    49.     0.00 
   0  -4  29 <   17(7)      6.     0.00 
   0  -4  32 <   49(14)     0.    180.00
   0  -4  34 <   20(12)     2.    180.00
   0  -3  18 o   41(4)     39.    180.00
   0  -3  23 o   5.4(25)    7.1    0.00 
   0  -3  24 o   11(4)     12.     0.00 
   0  -3  25 o   51(9)     34.     0.00 
   0  -3  29 <   29(7)     14.    180.00
   0  -3  31 <    8(8)      3.     0.00 
   0  -2  13 o   8.1(11)   10.9   180.00
   0  -2  14 o  27.8(19)   24.8   180.00
   0  -2  15 o  29.1(26)   24.5    0.00 
   0  -2  16 o   193(5)    194.   180.00
   0  -2  17 o   89(4)     82.     0.00 
   0  -2  18 o   2.6(12)    4.2    0.00 
   0  -2  19 o  12.4(24)    8.7   180.00
   0  -2  20 o   31(4)     34.     0.00 
   0  -2  21 o   17(4)     17.    180.00
   0  -2  24 o   31(6)     31.     0.00 
   0  -2  27 o   31(9)     36.     0.00 
   0  -2  28 <   34(9)     29.    180.00
   0  -2  31 <    9(6)      0.    180.00
   0  -1   6 o  10.2(9)     8.8    0.00 
   0  -1   7 o   3.6(8)     2.9   180.00
   0  -1   8 o   6.8(10)    6.9    0.00 
   0  -1   9 o   3.5(9)     4.9   180.00
   0  -1  10 o  124.5(30)  129.2  180.00
   0  -1  11 o   0.8(6)     0.4   180.00
   0  -1  12 o  33.2(19)   32.2   180.00
   0  -1  13 o  16.9(18)   13.7    0.00 
   0  -1  14 o   1.1(6)     0.5   180.00
   0  -1  15 o   8.5(15)    6.7    0.00 
   0  -1  16 o   8.1(15)    7.6   180.00
   0  -1  17 o  11.6(20)   10.0   180.00
   0  -1  18 o  24.8(28)   27.1    0.00 
   0  -1  21 o   4.8(22)    6.2   180.00
   0  -1  24 o   4.3(28)    4.7    0.00 
   0  -1  25 o   63(7)     51.     0.00 
   0  -1  26 o   37(6)     34.    180.00
   0  -1  27 o   62(7)     42.     0.00 
   0  -1  29 <    5(5)      0.    180.00
   0  -1  30 <   27(6)     23.     0.00 
   0  -1  31 <   13(6)      7.    180.00
   0  -1  34 <   10(8)      2.     0.00 
   0  -1  35 <   23(12)     0.    180.00
   0  -1  38 <   24(15)     3.    180.00
   1  -5  34 <    0(9)      3.    180.00
   1  -5  35 <   39(19)     0.    180.00
   1  -4  24 o   37(9)     33.     0.00 
   1  -4  25 <   19(5)     12.     0.00 
   1  -4  26 <   10(5)     13.     0.00 
   1  -4  29 <   14(6)      2.     0.00 
   1  -4  31 <   25(12)     1.    180.00
   1  -4  32 <   22(8)      7.    180.00
   1  -4  34 <   20(15)     0.    180.00
   1  -4  35 <    9(8)      1.     0.00 
   1  -4  36 <    9(10)     9.     0.00 
   1  -3  18 o   6.9(18)   12.6    0.00 
   1  -3  20 o   3.9(32)    8.7   180.00
   1  -3  21 o  11.5(28)    6.9    0.00 
   1  -3  22 o   15(5)      2.     0.00 
   1  -3  23 o  11.2(34)   20.1    0.00 
   1  -3  25 o   14(5)      1.    180.00
   1  -3  26 <   11(5)     13.    180.00
   1  -3  27 <   30(9)     12.    180.00
   1  -3  30 <   17(12)     1.    180.00
   1  -3  33 <    9(11)     0.    180.00
   1  -3  37 <   13(13)     0.    180.00
   1  -2  12 o   5.2(8)     6.1    0.00 
   1  -2  13 o  30.0(19)   27.2    0.00 
   1  -2  14 o  12.4(18)   16.8    0.00 
   1  -2  15 o  18.0(26)   17.3   180.00
   1  -2  16 o   7.3(17)    5.5    0.00 
   1  -2  18 o   4.9(20)    6.4   180.00
   1  -2  19 o   7.8(24)    8.5    0.00 
   1  -2  25 o   29(7)     13.    180.00
   1  -2  26 o   104(9)    102.    0.00 
   1  -2  27 <   18(5)     19.    180.00
   1  -2  29 <   53(12)     0.    180.00
   1  -2  30 <   35(10)    20.    180.00
   1  -2  33 <    2(8)      0.     0.00 
   1  -2  34 <   11(9)      0.    180.00
   1  -1  12 o   1.0(5)     2.1   180.00
   1  -1  13 o   2.7(8)     1.5   180.00
   1  -1  14 o  17.8(15)   17.2    0.00 
   1  -1  15 o   3.9(12)    2.6    0.00 
   1  -1  16 o  77.0(31)   78.6   180.00
   1  -1  17 o   0.7(11)    0.1   180.00
   1  -1  18 o   3.3(12)    0.0   180.00
   1  -1  20 o  10.7(29)   11.1    0.00 
   1  -1  22 o   3.3(35)    5.7   180.00
   1  -1  23 o   4.1(29)   10.8   180.00
   1  -1  24 o   28(5)     19.     0.00 
   1  -1  25 o   10(5)     18.    180.00
   1  -1  26 o   10(6)      1.    180.00
   1  -1  28 <   45(9)     64.    180.00
   1  -1  36 <    4(10)     7.     0.00 
   1  -1  38 <   43(21)     1.     0.00 
   2  -5  30 <   24(11)     1.     0.00 
   2  -5  33 <   11(9)      3.    180.00
   2  -5  34 <   18(9)      0.     0.00 
   2  -4  26 <    9(5)      4.    180.00
   2  -4  27 <   13(6)      1.     0.00 
   2  -4  28 <   26(8)      1.     0.00 
   2  -4  29 <   41(15)     9.    180.00
   2  -4  30 <   47(16)     7.     0.00 
   2  -4  34 <    3(10)     0.     0.00 
   2  -3  26 <   12(7)      2.     0.00 
   2  -3  31 <    5(11)     0.    180.00
   2  -3  32 <   25(11)     0.     0.00 
   2  -3  36 <   25(16)     1.    180.00
   2  -2  25 o   21(7)     26.     0.00 
   2  -2  26 <    5(5)      8.    180.00
   2  -2  27 <   33(7)     38.    180.00
   2  -2  28 <   11(14)    18.    180.00
   2  -2  29 <   26(12)    21.    180.00
   2  -2  33 <   20(9)     10.    180.00
   2  -2  35 <   36(14)    10.     0.00 
   2  -2  36 <   57(23)     2.     0.00 
   2  -2  37 <   21(15)     9.     0.00 
   2  -1  25 o   34(6)     14.    180.00
   2  -1  26 o   13(7)      3.    180.00
   2  -1  27 <   55(9)     45.    180.00
   2  -1  29 <    6(6)      5.     0.00 
   2  -1  29 <    6(6)      5.     0.00 
   2  -1  30 <   12(7)      3.     0.00 
   2  -1  31 <   34(12)     2.     0.00 
   2  -1  35 <   16(13)     4.     0.00 
   2  -1  35 <   20(15)     4.     0.00 
_reflns_number_total                   71
_reflns_limit_h_min                    -1
_reflns_limit_h_max                    2
_reflns_limit_k_min                    -5
_reflns_limit_k_max                    -1
_reflns_limit_l_min                    6
_reflns_limit_l_max                    38
_reflns_d_resolution_high              0.499
_reflns_d_resolution_low               2.906
data_UNOFA_s_35


loop_
      _refln_index_h
      _refln_index_k
      _refln_index_l
      _refln_observed_status
      _refln_F_squared_meas
      _refln_F_squared_calc
      _refln_phase_calc
   1   0   1 o  30.3(18)  32.5  180.00
   3  -1   2 o   0.6(4)    0.1  180.00
   3  -1   3 o  72.0(17)  70.1   0.00 
   3  -1   4 o   6.5(7)    5.3   0.00 
   3   0   3 o  60.8(16)  59.5  180.00
   4  -1   3 o  87.9(27)  86.8   0.00 
   4  -1   4 o   0.6(5)    0.7   0.00 
   4  -1   5 o   9.0(13)  11.6  180.00
   4  -1   6 o   2.1(8)    2.9   0.00 
   4   0   4 o  84.1(26)  82.0  180.00
   5  -1   3 o  10.0(19)   9.4   0.00 
   5  -1   4 o   70(4)    75.   180.00
   5  -1   5 o  22.0(25)  23.5   0.00 
   5  -1   6 o   2.5(14)   0.6  180.00
   5   0   5 o   9.0(22)   9.9  180.00
   5   0   7 o  32.5(28)  32.3  180.00
   6  -2   4 o   4.5(20)  11.8   0.00 
   6  -2   5 o   69(6)    78.   180.00
   6  -2   6 o   1.3(18)   0.9   0.00 
   6  -2   7 o  12.8(27)  20.0   0.00 
   6  -2   8 o   9.1(28)  12.1   0.00 
   6  -2   9 o   34(5)    38.    0.00 
   6  -1   4 o   0.8(19)   0.0   0.00 
   6  -1   5 o   64(6)    65.    0.00 
   6  -1   7 o   112(6)   107.   0.00 
   6  -1   8 o   3.6(18)   0.0   0.00 
   6  -1   9 o   24(4)    20.   180.00
   6   0   4 o   6.1(26)   2.3  180.00
   6   0   6 o   25(4)    27.    0.00 
   6   0   8 o   0.6(16)   1.4  180.00
   6   1   5 o   61(6)    65.    0.00 
   7  -2   4 o   18(7)     0.    0.00 
   7  -2   5 o   30(6)    28.    0.00 
   7  -2   6 o   99(9)    126.   0.00 
   7  -2   7 o   35(6)    30.    0.00 
   7  -2   8 o    8(4)     4.    0.00 
   7  -2   9 o   12(4)    11.   180.00
   7  -2  10 o  14.9(35)  12.1  180.00
   7  -1   4 o   74(9)    67.    0.00 
   7  -1   5 o  11.3(35)  21.2   0.00 
   7  -1   8 o   79(8)    83.   180.00
   7  -1   9 o   33(6)    34.   180.00
   7   0   5 o    5(4)     1.    0.00 
   7   0   7 o   85(10)   90.   180.00
   7   1   6 o   3.4(31)   0.1   0.00 
   7   1   7 o  10.0(33)   9.6   0.00 
   7   1   8 o   82(8)    83.   180.00
   8  -3   5 o   15(4)    20.    0.00 
   8  -3   6 o    5(5)     1.    0.00 
   8  -2   7 o   16(8)     0.   180.00
   8  -2  10 o   10(5)     1.   180.00
   8  -2  12 o    7(5)     0.    0.00 
   8  -1   5 o   20(8)    27.   180.00
   8  -1   6 o   21(10)   23.   180.00
   8  -1   7 o   23(6)    19.   180.00
   8   0   8 o    7(7)     1.    0.00 
   8   0   9 <    9(5)     0.    0.00 
   8   0  11 <    6(5)     0.    0.00 
   8   0  12 o   12(6)    13.   180.00
   8   0  13 <   12(6)     0.    0.00 
   8   1   6 o   28(7)    23.    0.00 
   8   1   7 o   18(6)    19.   180.00
   8   1   8 o   11(7)     4.   180.00
   8   1  10 o    7(6)     7.   180.00
   9  -3  13 <   15(8)     0.   180.00
   9  -2   5 o   38(9)     0.   180.00
   9  -2   9 <   25(13)   31.    0.00 
   9  -2  10 <   22(9)    18.   180.00
   9  -2  11 <   10(6)     3.   180.00
   9  -1   7 <   12(8)    12.    0.00 
   9  -1  10 <   16(6)    12.    0.00 
   9  -1  14 <   18(11)    0.   180.00
   9   0   7 o   19(9)     6.   180.00
   9   0   8 <   11(7)     0.    0.00 
   9   0   9 <   32(10)   46.   180.00
   9   0  11 <   15(6)     9.    0.00 
   9   0  12 <    5(5)     0.    0.00 
   9   0  13 <   12(6)     1.    0.00 
   9   1   7 <   12(5)    12.   180.00
   9   1  10 <   19(8)    12.    0.00 
   9   1  11 <   36(10)   14.    0.00 
   9   1  12 <   12(7)     2.    0.00 
  10  -3   6 <   18(9)     0.   180.00
  10  -3   8 <   14(10)    1.    0.00 
  10  -3  10 <   10(7)     1.    0.00 
  10  -3  12 <   21(9)     0.   180.00
  10  -2   9 <   10(7)     1.   180.00
  10  -2  15 <   11(7)     1.    0.00 
  10  -1   7 <    9(7)     3.    0.00 
  10  -1   8 <   34(12)   13.   180.00
  10  -1   9 <   16(9)     9.    0.00 
  10  -1  10 <   16(9)     2.    0.00 
  10  -1  11 <    4(7)     1.   180.00
  10  -1  12 <   12(9)     4.    0.00 
  10  -1  14 <   29(15)    1.   180.00
  10   0   7 <   16(9)     0.    0.00 
  10   1   8 <   11(8)    13.    0.00 
  10   1  16 <   22(8)    23.   180.00
  11  -4  10 <   24(9)     0.   180.00
  11  -4  12 <   21(11)    1.    0.00 
  11  -4  15 <   39(14)    0.    0.00 
  11  -3   6 <   44(19)    0.    0.00 
  11  -3   9 <   17(12)    0.    0.00 
  11  -3  14 <   14(12)    1.    0.00 
  11  -3  15 <   34(18)    0.    0.00 
  11  -2   9 <   22(8)     0.    0.00 
  11  -2  14 <   40(17)    0.    0.00 
  11  -2  16 <   28(12)    0.    0.00 
  11  -1  14 <   12(9)     1.   180.00
  11  -1  16 <   18(9)     0.   180.00
  11  -1  17 <   16(8)     7.   180.00
  11   0   7 <    2(8)     1.   180.00
  11   0  13 <    5(11)    4.    0.00 
  11   0  17 <   18(13)   13.   180.00
  11   1  11 <   17(9)     0.    0.00 
  11   1  14 <   41(18)    1.   180.00
  11   1  15 <   14(8)     0.    0.00 
  11   1  17 <   21(7)     7.    0.00 
  11   1  18 <   31(9)     5.    0.00 
  12  -4   7 <   119(21)   0.    0.00 
  12  -4  10 <   37(14)    0.    0.00 
  12  -2  11 <    7(12)    1.    0.00 
  12  -1   7 <   47(16)    3.    0.00 
  12  -1   8 <   35(15)    1.   180.00
  12  -1  11 <   36(15)    0.    0.00 
  12  -1  14 <   18(14)    3.    0.00 
  12   0  10 <   14(14)    0.    0.00 
  12   1  11 <   53(25)    0.    0.00 
  12   1  14 <    3(12)    3.   180.00
  12   2  10 <   55(17)    0.    0.00 
_reflns_number_total                   63
_reflns_limit_h_min                    1
_reflns_limit_h_max                    12
_reflns_limit_k_min                    -4
_reflns_limit_k_max                    2
_reflns_limit_l_min                    1
_reflns_limit_l_max                    18
_reflns_d_resolution_high              0.500
_reflns_d_resolution_low               6.151
data_UNOFA_s_36


loop_
      _refln_index_h
      _refln_index_k
      _refln_index_l
      _refln_observed_status
      _refln_F_squared_meas
      _refln_F_squared_calc
      _refln_phase_calc
   1   0   3 o   64(5)    140.  180.00
   1   0   4 <   0.9(4)    0.0   0.00 
   2  -1   6 o   7.6(13)  10.5  180.00
   2  -1   7 o   9.4(11)  10.4  180.00
   2  -1   8 o   6.3(11)   5.6   0.00 
   2   0   4 o   9.7(9)    8.2  180.00
   2   0   5 <   1.2(4)    0.0   0.00 
   2   0   6 o   5.0(8)    5.1  180.00
   2   0   8 o   236(5)   257.   0.00 
   3  -1   6 o   7.8(11)   6.9   0.00 
   3  -1   7 o   4.2(10)   4.5   0.00 
   3  -1   8 o  13.1(14)  12.8   0.00 
   3  -1   9 o  30.9(21)  29.7  180.00
   3  -1  10 o   182(4)   172.   0.00 
   3  -1  11 o  17.4(16)  15.4  180.00
   3  -1  12 o  22.6(24)  20.2   0.00 
   4  -2  11 o   122(5)   114.   0.00 
   4  -2  13 o   41(4)    35.   180.00
   4  -2  14 o   2.5(14)   2.3  180.00
   4  -2  15 o   42(5)    36.   180.00
   4  -1   9 o   9.8(15)  11.8   0.00 
   4  -1  10 o   6.9(17)   3.7  180.00
   4  -1  11 o   105(4)   96.   180.00
   4  -1  12 o  27.7(33)  25.6  180.00
   4  -1  13 o  33.7(31)  26.2  180.00
   4  -1  14 o   1.1(12)   0.0   0.00 
   4  -1  15 o   5.8(30)   7.0   0.00 
   4  -1  16 o   9.8(24)   8.7   0.00 
   4   0   8 o   9.4(13)   7.3   0.00 
   4   0   9 <   1.1(8)    0.0   0.00 
   4   0  10 o  29.8(26)  24.0  180.00
   4   0  11 <  26.9(29)   0.0   0.00 
   4   0  12 o   125(5)   116.  180.00
   4   0  16 o   43(4)    39.    0.00 
   5  -2  10 o   9.7(23)   6.8   0.00 
   5  -2  11 o  12.4(30)  16.3  180.00
   5  -2  12 o  13.7(31)   6.2  180.00
   5  -2  13 o   6.8(22)   8.8  180.00
   5  -2  14 o   4.1(20)   2.4   0.00 
   5  -2  15 o   9.9(32)  10.9   0.00 
   5  -2  16 o   33(5)    29.   180.00
   5  -2  18 o   14(5)    14.    0.00 
   5  -2  19 o   25(6)    22.    0.00 
   5  -2  20 o   144(11)  96.    0.00 
   5  -1  10 o  48.0(35)  48.7  180.00
   5  -1  11 o   14(4)    12.   180.00
   5  -1  12 o   8.1(25)   9.6   0.00 
   5  -1  13 o   4.9(33)   5.6   0.00 
   5  -1  14 o   25(5)    23.    0.00 
   5  -1  15 o   25(4)    17.    0.00 
   5  -1  17 o    6(4)     1.    0.00 
   5  -1  18 o   9.2(26)   4.4   0.00 
   5  -1  19 o   12(4)     7.   180.00
   5   0  11 o   3.0(16)   2.8   0.00 
   5   0  13 o    9(4)     8.    0.00 
   5   0  14 <   5.5(20)   0.0   0.00 
   5   0  15 o   3.1(23)   6.1  180.00
   5   0  16 <   4.3(31)   0.0   0.00 
   5   0  17 o  11.6(26)   3.6   0.00 
   5   0  19 o   6.5(32)   2.4   0.00 
   5   0  21 o   20(4)    14.   180.00
   6  -3  16 o   11(5)     5.    0.00 
   6  -3  18 o   10(6)     0.   180.00
   6  -3  19 <   33(7)    14.    0.00 
   6  -3  23 <   33(9)    20.   180.00
   6  -2  14 o   14(5)     2.    0.00 
   6  -2  15 o   4.0(34)   7.7  180.00
   6  -2  17 o    9(4)     4.   180.00
   6  -2  19 o   13(6)     9.    0.00 
   6  -2  21 <   15(5)     6.   180.00
   6  -2  22 <   10(9)    18.   180.00
   6  -2  23 <   10(5)     1.   180.00
   6  -1  13 o    2(4)     0.    0.00 
   6  -1  15 o   2.0(31)   0.0  180.00
   6  -1  19 o   15(7)    14.   180.00
   6  -1  20 <   15(9)    27.   180.00
   6   0  12 o  11.8(35)   0.4   0.00 
   6   0  16 o   15(7)    24.   180.00
   6   0  17 <    3(4)     0.    0.00 
   6   0  23 <    3(5)     0.    0.00 
   6   0  24 <   17(8)     6.   180.00
   7  -4  25 <   67(17)    1.    0.00 
   7  -4  27 <   31(11)    0.   180.00
   7  -3  14 o   14(6)     4.    0.00 
   7  -3  16 <   34(9)    12.   180.00
   7  -3  17 <    6(6)     9.   180.00
   7  -3  20 <   23(10)    0.   180.00
   7  -3  21 <   16(12)    1.    0.00 
   7  -3  28 <   19(8)     0.    0.00 
   7  -2  13 o   22(6)     9.   180.00
   7  -2  14 o   19(6)    11.   180.00
   7  -2  17 <   16(9)    26.    0.00 
   7  -2  18 <    5(11)    4.    0.00 
   7  -2  23 <   16(9)     4.    0.00 
   7  -1  14 o    4(6)     2.   180.00
   7  -1  15 o    9(5)     2.    0.00 
   7  -1  17 <   12(8)     4.    0.00 
   7  -1  20 <   16(9)     4.   180.00
   7  -1  22 <   31(9)     0.    0.00 
   7  -1  23 <   19(7)     9.   180.00
   7  -1  24 <   26(11)    9.    0.00 
   7  -1  25 <   29(9)    21.   180.00
   7  -1  27 <    8(7)     0.    0.00 
   7  -1  28 <   20(11)    2.   180.00
   7  -1  29 <   12(13)    0.   180.00
   7   0  14 <    8(6)     0.    0.00 
   7   0  15 o   30(8)     4.    0.00 
   7   0  23 <   32(11)   21.   180.00
   7   0  24 <   39(11)    0.    0.00 
   7   0  24 <   21(8)     0.    0.00 
   7   0  28 <    1(9)     0.    0.00 
   8  -4  20 <   18(12)    2.   180.00
   8  -4  23 <   19(9)     0.   180.00
   8  -4  26 <   16(15)    0.    0.00 
   8  -3  18 <   10(7)     0.   180.00
   8  -3  23 <   35(15)    0.    0.00 
   8  -2  15 <   63(10)   10.    0.00 
   8  -2  16 <   26(7)    19.    0.00 
   8  -2  17 <   29(8)    22.    0.00 
   8  -2  18 <   21(10)    8.    0.00 
   8  -2  19 <   12(11)    1.   180.00
   8  -2  23 <   32(15)    0.   180.00
   8  -2  24 <   10(9)     2.   180.00
   8  -1  18 <   30(12)    3.   180.00
   8  -1  21 <   13(11)    0.    0.00 
   8  -1  22 <    8(9)    11.   180.00
   8  -1  24 <   20(12)    0.    0.00 
   8  -1  25 <    2(10)    0.   180.00
   8  -1  26 <    5(10)    2.    0.00 
   8   0  24 <   28(17)   19.    0.00 
   9  -4  19 <   17(12)    2.   180.00
   9  -4  20 <   15(13)    7.   180.00
   9  -3  18 <   18(9)     9.   180.00
   9  -3  20 <   32(12)    1.   180.00
   9  -2  22 <   29(11)    1.   180.00
   9  -2  23 <   11(15)    1.    0.00 
   9  -2  25 <   37(23)    0.    0.00 
   9  -1  17 <   88(14)    0.    0.00 
   9  -1  18 <   14(9)     8.   180.00
   9  -1  22 <   29(23)    2.    0.00 
   9  -1  26 <    5(16)    0.   180.00
   9   0  18 <   11(8)     0.    0.00 
   9   0  21 <   22(11)   18.   180.00
   9   0  26 <   22(17)    0.    0.00 
  10  -1  20 <   40(16)   18.   180.00
  10  -1  22 <   38(16)    2.   180.00
  10  -1  23 <   47(16)    0.    0.00 
  10   0  21 <   39(22)    0.    0.00 
_reflns_number_total                   72
_reflns_limit_h_min                    1
_reflns_limit_h_max                    10
_reflns_limit_k_min                    -4
_reflns_limit_k_max                    0
_reflns_limit_l_min                    3
_reflns_limit_l_max                    29
_reflns_d_resolution_high              0.500
_reflns_d_resolution_low               4.440
data_UNOFA_s_37


loop_
      _refln_index_h
      _refln_index_k
      _refln_index_l
      _refln_observed_status
      _refln_F_squared_meas
      _refln_F_squared_calc
      _refln_phase_calc
   1   0  -1 o  41.4(27)   58.3    0.00 
   2   0  -2 o  192.0(34)  190.4   0.00 
   3  -1  -4 o   0.4(4)     0.6    0.00 
   3   0  -3 o  287.2(34)  284.4   0.00 
   4  -1  -5 o   7.9(11)    9.1   180.00
   4  -1  -4 o  16.8(15)   18.8    0.00 
   4  -1  -3 o  19.3(12)   17.9    0.00 
   4   0  -5 <   1.3(6)     0.0    0.00 
   4   0  -3 <   1.5(5)     0.0    0.00 
   5  -1  -7 o   4.8(13)    6.6    0.00 
   5  -1  -4 o  67.0(28)   63.6    0.00 
   5  -1  -3 o  45.0(23)   43.4   180.00
   5   0  -7 o   5.4(17)    4.2   180.00
   5   0  -5 o  53.6(27)   52.6    0.00 
   5   0  -4 <   1.6(8)     0.0    0.00 
   5   0  -3 o   5.0(8)     2.7   180.00
   5   1  -7 o   8.4(13)    6.6   180.00
   6  -1  -8 o   13(4)      7.     0.00 
   6  -1  -7 o  12.0(34)   12.0    0.00 
   6  -1  -6 o   2.5(16)    4.3    0.00 
   6  -1  -5 o  10.1(23)   11.6    0.00 
   6  -1  -4 o  33.4(27)   35.2    0.00 
   6   0  -8 o   32(5)     36.     0.00 
   6   0  -4 o  42.6(29)   42.6   180.00
   6   1  -7 o   9.8(28)   12.0    0.00 
   6   1  -6 o   7.2(22)    4.3   180.00
   6   1  -5 o  13.2(26)   11.6    0.00 
   7  -2  -9 o   40(5)     48.     0.00 
   7  -2  -8 o   9.2(26)    5.3   180.00
   7  -1 -10 o   15(5)     20.    180.00
   7  -1  -9 o  10.4(28)   10.2    0.00 
   7  -1  -8 o    7(4)      0.     0.00 
   7  -1  -6 o   5.1(29)    0.7   180.00
   7  -1  -5 o   24(4)     26.    180.00
   7   0  -9 o   4.3(29)    1.7    0.00 
   7   0  -5 o   19(4)     15.    180.00
   7   1 -10 o   39(6)     20.    180.00
   7   1  -9 o   8.7(32)   10.2   180.00
   7   1  -6 o   2.6(28)    0.7   180.00
   7   1  -5 o   22(4)     26.     0.00 
   8  -2 -11 o   53(9)     32.    180.00
   8  -2 -10 o   15(6)     18.     0.00 
   8  -2  -9 o   62(11)    64.    180.00
   8  -2  -7 o   24(6)     31.     0.00 
   8  -1 -11 o    5(6)      6.    180.00
   8  -1 -10 o    6(5)      1.     0.00 
   8  -1  -9 o   25(5)     33.     0.00 
   8  -1  -7 o   8.2(32)    3.6    0.00 
   8  -1  -6 o   7.2(29)    1.7   180.00
   8   0 -11 <   10(6)      0.     0.00 
   8   0 -10 o   10(7)      4.     0.00 
   8   0  -8 o   11(4)     17.     0.00 
   8   1 -11 o    6(4)      6.    180.00
   8   1  -9 o   29(5)     33.     0.00 
   9  -2 -12 <   25(6)     23.    180.00
   9  -2  -9 o   11(6)     10.     0.00 
   9  -2  -8 o   55(8)     48.     0.00 
   9  -1 -12 <   17(7)      6.     0.00 
   9  -1 -11 o   12(6)     18.     0.00 
   9  -1 -10 o   61(8)     72.     0.00 
   9  -1  -9 o   19(9)     25.     0.00 
   9  -1  -8 o    5(5)      6.    180.00
   9  -1  -7 o   26(8)     14.    180.00
   9  -1  -6 o   62(9)     59.    180.00
   9   0 -12 <    7(7)      0.     0.00 
   9   0 -11 o   33(8)     27.     0.00 
   9   0 -10 <    7(7)      0.     0.00 
   9   0  -9 o   25(13)    36.    180.00
   9   0  -7 o   34(9)     27.    180.00
   9   1 -10 o   57(11)    72.     0.00 
   9   1  -9 o   14(5)     25.    180.00
   9   1  -8 o   24(7)      6.    180.00
   9   1  -7 o    7(4)     14.     0.00 
   9   1  -6 o   51(7)     59.    180.00
  10  -3 -14 <   70(14)     0.     0.00 
  10  -3 -12 <   11(8)      3.     0.00 
  10  -2 -10 <   25(8)      7.     0.00 
  10  -2  -6 <    5(4)      1.    180.00
  10  -1  -9 <   22(6)     15.    180.00
  10  -1  -8 <   51(11)    35.    180.00
  10  -1  -7 <   24(9)     14.    180.00
  10   0 -14 <    3(9)      0.     0.00 
  10   0 -10 <   56(11)    35.    180.00
  10   1 -10 <    9(5)      0.     0.00 
  10   1  -9 <   16(8)     15.    180.00
  10   1  -8 <   36(12)    35.     0.00 
  11  -3 -14 <    3(8)      3.    180.00
  11  -3 -12 <   11(10)     2.     0.00 
  11  -3 -10 <   12(7)      4.    180.00
  11  -2 -13 <   11(7)      3.    180.00
  11  -2 -11 <   14(12)     1.    180.00
  11  -2 -10 <   33(11)     5.     0.00 
  11  -2  -8 <   21(11)     0.     0.00 
  11  -2  -7 <   15(8)      1.     0.00 
  11  -1 -16 <   38(14)     2.    180.00
  11  -1 -12 <   37(9)      1.     0.00 
  11  -1 -10 <   12(10)     2.    180.00
  11  -1  -7 <   17(9)      8.     0.00 
  11   0 -12 <    3(10)     0.     0.00 
  11   0 -11 <   14(12)     2.     0.00 
  11   0  -7 <   16(7)      0.    180.00
  11   1 -14 <   10(8)      4.     0.00 
  11   1 -13 <   20(11)    11.    180.00
  11   1 -12 <   21(12)     1.     0.00 
  11   1  -8 <   30(9)      6.    180.00
  11   1  -7 <   17(9)      8.    180.00
  11   2 -13 <    3(8)      3.    180.00
  12  -3 -14 <   12(12)     0.     0.00 
  12  -3  -9 <   13(9)      1.     0.00 
  12  -2 -16 <   32(18)     3.    180.00
  12  -2 -14 <   14(12)     0.    180.00
  12  -2 -11 <   13(8)      1.     0.00 
  12  -2  -9 <   16(7)      0.     0.00 
  12  -2  -8 <   10(10)    12.     0.00 
  12  -1 -13 <   15(12)     4.     0.00 
  12  -1  -9 <   14(8)      6.    180.00
  12   0 -17 <    7(14)     0.     0.00 
  12   0 -14 <   23(9)      0.     0.00 
  12   0  -8 <   25(12)     7.    180.00
  12   1 -17 <   21(10)     0.    180.00
  12   1 -10 <   22(12)     0.    180.00
  12   2 -17 <   33(17)    11.     0.00 
  12   2 -16 <   34(15)     3.    180.00
  12   2 -15 <   26(14)     2.     0.00 
  12   2 -14 <   17(10)     0.    180.00
  12   2 -12 <   15(16)     3.     0.00 
  13  -3 -10 <   13(12)     2.    180.00
  13  -2 -12 <   12(10)     3.     0.00 
  13  -1 -15 <    6(15)     1.     0.00 
  13  -1  -9 <   18(8)      1.     0.00 
  13   0 -13 <   22(11)     1.     0.00 
  13   0 -12 <   14(10)     0.     0.00 
  13   0  -8 <   20(12)     0.     0.00 
_reflns_number_total                   66
_reflns_limit_h_min                    1
_reflns_limit_h_max                    13
_reflns_limit_k_min                    -3
_reflns_limit_k_max                    2
_reflns_limit_l_min                    -17
_reflns_limit_l_max                    -1
_reflns_d_resolution_high              0.493
_reflns_d_resolution_low               6.520
data_UNOFA_s_38


loop_
      _refln_index_h
      _refln_index_k
      _refln_index_l
      _refln_observed_status
      _refln_F_squared_meas
      _refln_F_squared_calc
      _refln_phase_calc
   2   0   0 o  56.5(30)  60.0  180.00
   3   0  -1 o   9.5(10)  10.0   0.00 
   3   0   1 o  69.0(27)  84.3  180.00
   4  -1  -1 o   5.4(16)   2.1  180.00
   4  -1   0 o  18.0(14)  18.6  180.00
   4  -1   2 o   9.2(12)   8.1   0.00 
   4   0   0 o  10.1(15)  11.2   0.00 
   4   0   2 o  24.0(17)  18.9  180.00
   5  -1  -1 o  19.8(20)  19.8   0.00 
   5  -1   0 o  74.2(28)  71.2  180.00
   5  -1   1 o   2.3(8)    7.1  180.00
   5  -1   2 o   6.7(16)   6.6  180.00
   5  -1   3 o  12.9(14)   9.4   0.00 
   5   0  -1 o  43.5(26)  44.7  180.00
   5   0   1 o  13.1(18)  10.3   0.00 
   6  -1  -2 o   110(4)   106.  180.00
   6  -1  -1 o  28.1(32)  26.1  180.00
   6  -1   1 o   7.2(19)   7.4   0.00 
   6  -1   2 o  39.8(33)  36.6   0.00 
   6  -1   3 o   9.6(26)  10.2  180.00
   6   0  -2 o  29.3(26)  23.2  180.00
   6   0  -1 <   4.1(22)   0.0   0.00 
   6   0   0 o  29.0(25)  27.7   0.00 
   6   0   2 o  16.3(27)  14.7   0.00 
   6   0   3 <   3.0(22)   0.0   0.00 
   7  -1  -2 o  16.3(32)   9.8   0.00 
   7  -1  -1 o   15(4)     4.    0.00 
   7  -1   0 o   15(4)    16.    0.00 
   7  -1   1 o   3.0(30)   1.8   0.00 
   7  -1   2 o   36(4)    26.    0.00 
   7  -1   3 o   40(5)    33.    0.00 
   7  -1   4 o   74(5)    67.    0.00 
   7   0  -2 <   4.7(18)   0.0   0.00 
   7   0  -1 o   78(6)    70.    0.00 
   7   0   1 o  11.4(27)   8.8  180.00
   7   0   3 o   11(4)     8.    0.00 
   7   0   4 <   7.1(27)   0.0   0.00 
   7   1  -2 o   5.9(23)   9.8   0.00 
   7   1  -1 o   9.4(26)   3.6  180.00
   7   1   0 o   28(5)    16.    0.00 
   8  -2  -2 o    5(4)     2.    0.00 
   8  -2  -1 o   12(4)     6.   180.00
   8  -2   2 o    6(5)     0.    0.00 
   8  -2   3 o   25(5)    25.    0.00 
   8  -2   4 o   6.0(27)   7.4   0.00 
   8  -1  -3 o   38(7)     6.    0.00 
   8  -1  -2 o   11(5)     6.    0.00 
   8  -1   4 o  16.1(35)   3.7   0.00 
   8  -1   5 o   22(5)    27.   180.00
   8   0   0 o   6.4(28)   0.7   0.00 
   8   0   4 o   26(6)    10.   180.00
   8   0   5 <   4.4(25)   0.0   0.00 
   8   1  -2 o   19(5)     6.   180.00
   8   1  -1 o   11(5)     2.   180.00
   8   1   4 o   24(5)     4.   180.00
   8   1   5 o   28(4)    27.   180.00
   9  -2  -3 o   44(8)     0.   180.00
   9  -2   0 o   53(13)   47.   180.00
   9  -2   1 o   18(6)     9.   180.00
   9  -2   4 o   10(5)     9.    0.00 
   9  -1  -1 o   13(7)     1.   180.00
   9  -1   1 o   12(5)    24.    0.00 
   9   0   1 o   20(6)    22.    0.00 
   9   0   2 <    3(5)     0.    0.00 
   9   0   3 o   11(5)    10.    0.00 
   9   0   4 <   12(5)     0.    0.00 
   9   0   5 o    6(5)     1.   180.00
   9   1  -3 o    3(4)     2.    0.00 
   9   1  -1 o    6(4)     1.    0.00 
   9   1   0 o   15(8)     0.    0.00 
   9   1   1 o   39(9)    24.   180.00
   9   1   4 o    6(4)     1.   180.00
   9   1   6 o   21(6)     7.   180.00
  10  -2  -2 <   21(9)    11.   180.00
  10  -2  -1 <    6(6)     8.   180.00
  10  -2   2 <   17(8)    13.    0.00 
  10  -2   4 <   19(9)     0.    0.00 
  10  -1  -1 <   23(7)    26.    0.00 
  10  -1   0 <   40(9)    20.    0.00 
  10  -1   1 <    9(10)   18.    0.00 
  10  -1   2 <   17(5)     2.    0.00 
  10  -1   3 <   13(6)    10.   180.00
  10  -1   5 <   10(5)     5.   180.00
  10   0  -1 <    9(6)     0.    0.00 
  10   0   6 <   29(9)    14.   180.00
  10   1  -1 <   43(14)   26.    0.00 
  10   1   0 <   34(10)   20.   180.00
  10   1   1 <    6(9)    18.    0.00 
  10   1   2 <    8(8)     2.   180.00
  10   1   3 <   22(8)    10.   180.00
  10   1   4 <   10(6)     4.    0.00 
  11  -2  -3 <   14(9)     5.   180.00
  11  -2  -2 <   10(11)    1.    0.00 
  11  -2   0 <   29(11)   15.    0.00 
  11  -2   1 <   23(10)    3.    0.00 
  11  -1  -4 <   118(16)  17.    0.00 
  11  -1  -3 <   30(14)    0.   180.00
  11  -1  -2 <    2(8)     4.    0.00 
  11  -1   0 <    7(8)     2.    0.00 
  11   0  -3 <   21(11)    2.    0.00 
  11   0   0 <   30(16)    0.    0.00 
  11   0   3 <   44(15)   13.    0.00 
  11   1  -2 <   23(16)    4.    0.00 
  11   1  -1 <   29(10)    1.    0.00 
  11   1   1 <   33(8)     6.    0.00 
  11   1   2 <   37(14)    4.   180.00
  11   1   4 <   29(13)    8.   180.00
  11   1   5 <   27(13)    4.   180.00
  12  -3  -4 <   40(15)    0.    0.00 
  12  -3  -3 <   12(13)    0.   180.00
  12  -3   0 <   18(13)    0.   180.00
  12  -3   4 <   46(16)    0.    0.00 
  12  -2  -4 <   17(13)    4.   180.00
  12  -2  -1 <   15(13)    0.   180.00
  12  -2   1 <   37(16)    8.    0.00 
  12  -1   0 <   27(9)     0.   180.00
  12  -1   1 <   28(10)    9.   180.00
  12  -1   2 <   32(14)   24.    0.00 
  12  -1   6 <   10(9)     8.   180.00
  12  -1   7 <   16(12)    3.    0.00 
  12   0  -3 <   23(10)    0.    0.00 
  12   0  -2 <   23(14)    2.    0.00 
  12   0   0 <   49(18)   35.    0.00 
  12   0   4 <   48(15)   42.   180.00
  12   0   5 <   19(10)    0.    0.00 
  12   0   6 <   17(15)    4.   180.00
  12   1  -1 <   11(10)    1.   180.00
  12   1   0 <   14(10)    0.    0.00 
  12   1   1 <   47(19)    9.   180.00
  12   1   3 <   31(16)    7.   180.00
  12   1   6 <   45(18)    8.    0.00 
  13  -3   0 <   47(20)    0.    0.00 
  13  -3   3 <   21(15)    1.   180.00
  13  -1   4 <   20(11)   10.    0.00 
  13  -1   5 <   40(14)    1.   180.00
  13   0  -5 <   50(23)    0.   180.00
  13   0  -1 <   38(23)    0.    0.00 
  13   0   1 <    5(16)    3.   180.00
  13   0   2 <   27(20)    0.    0.00 
  13   0   6 <   18(11)    0.    0.00 
  13   1   0 <   29(13)    4.   180.00
  13   1   1 <   17(12)    1.   180.00
  13   1   4 <   19(11)   10.    0.00 
  13   1   7 <    8(11)    0.   180.00
  13   2  -3 <   30(15)    0.    0.00 
_reflns_number_total                   66
_reflns_limit_h_min                    2
_reflns_limit_h_max                    13
_reflns_limit_k_min                    -3
_reflns_limit_k_max                    2
_reflns_limit_l_min                    -5
_reflns_limit_l_max                    7
_reflns_d_resolution_high              0.497
_reflns_d_resolution_low               3.348
data_UNOFA_s_39


loop_
      _refln_index_h
      _refln_index_k
      _refln_index_l
      _refln_observed_status
      _refln_F_squared_meas
      _refln_F_squared_calc
      _refln_phase_calc
 -10  -8  13 <   26(17)     0.    180.00
  -9  -9   9 <   17(16)     0.     0.00 
  -9  -9  10 <    6(10)     0.    180.00
  -9  -8   5 <   18(12)     2.     0.00 
  -9  -8   7 <   17(7)     14.     0.00 
  -9  -8   9 <    6(9)     10.    180.00
  -9  -8  11 <   37(14)    16.    180.00
  -9  -7   7 <   18(7)     18.    180.00
  -9  -7   9 <   35(11)    33.    180.00
  -9  -7  13 <   50(16)    23.     0.00 
  -8 -10   8 <   13(10)     0.     0.00 
  -8 -10   9 <   16(11)     0.     0.00 
  -8  -9   5 <   20(11)     4.     0.00 
  -8  -9   7 <   13(11)     0.    180.00
  -8  -8   4 <   11(8)      0.    180.00
  -8  -8   6 <   19(9)      0.    180.00
  -8  -8   8 <    9(8)     16.    180.00
  -8  -8  10 <    6(11)     1.    180.00
  -8  -7   6 <   48(11)    29.    180.00
  -8  -7   7 <    6(8)      1.    180.00
  -8  -7  10 <   102(17)   89.     0.00 
  -8  -7  11 <   13(8)      8.    180.00
  -8  -7  12 <    6(8)      2.     0.00 
  -8  -6  11 <    1(6)      3.     0.00 
  -7 -11   3 <    7(9)      0.    180.00
  -7 -11   6 <   52(22)     0.     0.00 
  -7 -11   7 <   16(11)     0.     0.00 
  -7 -10   8 <   18(14)     3.    180.00
  -7  -9   3 <   10(9)      4.    180.00
  -7  -9   6 <    8(10)     1.    180.00
  -7  -9  12 <   16(10)     0.     0.00 
  -7  -8   6 <   16(5)      1.    180.00
  -7  -7   6 <   21(7)      3.     0.00 
  -7  -7   9 <    6(6)      4.     0.00 
  -7  -6   4 o   20(5)      8.     0.00 
  -7  -6   7 o    3(4)      1.     0.00 
  -7  -6   8 o   12(5)      0.     0.00 
  -7  -6   9 o   24(10)     0.     0.00 
  -7  -6  11 <   92(13)     1.     0.00 
  -6 -11  10 <   37(17)     1.     0.00 
  -6 -10   4 <   12(10)     0.     0.00 
  -6 -10   7 <    0(9)      1.    180.00
  -6  -9   2 <   14(9)      1.    180.00
  -6  -9   8 <   18(7)      9.     0.00 
  -6  -9  11 <   12(8)      2.     0.00 
  -6  -8   3 <   17(9)      6.     0.00 
  -6  -8   4 <   17(8)      6.     0.00 
  -6  -8   5 <   13(6)      4.    180.00
  -6  -8   8 <   19(9)     12.    180.00
  -6  -8  10 <   22(16)    12.    180.00
  -6  -7   4 o   122(12)   126.   180.00
  -6  -7   5 o   16(6)      1.     0.00 
  -6  -7   7 o    6(7)      4.     0.00 
  -6  -7   8 o   36(8)      4.     0.00 
  -6  -6   3 o    8(6)      8.     0.00 
  -6  -6   4 o   6.7(31)    1.9    0.00 
  -6  -6   5 o    9(6)     10.    180.00
  -6  -6   7 o   14(6)     15.    180.00
  -6  -6   9 o    9(6)      1.     0.00 
  -6  -5   3 o   32(6)     36.    180.00
  -6  -5   5 o   7.0(29)    7.7    0.00 
  -6  -5   6 o   18(5)     14.    180.00
  -6  -5   8 o   12(5)      8.    180.00
  -5  -9   5 <   11(5)      0.    180.00
  -5  -9   6 <   14(9)      0.     0.00 
  -5  -9   7 <   15(8)      2.     0.00 
  -5  -9   8 <   10(10)    17.    180.00
  -5  -8   3 o   47(10)    42.    180.00
  -5  -8   4 o   15(7)     10.    180.00
  -5  -8   5 o   18(5)     10.    180.00
  -5  -8   6 o    7(5)     29.    180.00
  -5  -8   7 <    1(5)      0.     0.00 
  -5  -8   8 <   35(10)    23.    180.00
  -5  -8   9 <   19(7)     29.    180.00
  -5  -7   3 o   28(7)     31.    180.00
  -5  -7   4 o   14(5)      3.     0.00 
  -5  -7   6 o   14(5)     15.    180.00
  -5  -7   9 o   43(12)     6.     0.00 
  -5  -6   3 o   16(5)     17.     0.00 
  -5  -6   4 o   17(5)     15.    180.00
  -5  -6   7 o   17(7)     27.    180.00
  -5  -5   3 o  12.5(28)   19.6   180.00
  -5  -5   5 o   8.0(25)    8.0   180.00
  -5  -4   4 o   41(4)     42.    180.00
  -5  -4   6 o   30(4)     30.    180.00
  -5  -4   7 o    7(4)     13.    180.00
  -4  -9   7 <   71(10)    70.    180.00
  -4  -8   7 o   14(7)     11.     0.00 
  -4  -7   2 o   3.7(28)    0.6   180.00
  -4  -7   4 o    4(4)     13.     0.00 
  -4  -7   5 o    9(4)      0.    180.00
  -4  -6   2 o   7.7(23)    8.6   180.00
  -4  -6   3 o   25(7)     25.    180.00
  -4  -6   4 o   9.3(27)   10.8   180.00
  -4  -6   5 o   11(4)      1.    180.00
  -4  -6   7 o   27(7)     35.     0.00 
  -4  -5   2 o  12.7(22)   10.9   180.00
  -4  -5   3 o   3.7(16)    7.2   180.00
  -4  -5   5 o   2.7(18)    0.0   180.00
  -4  -5   6 o  13.7(33)   29.8    0.00 
  -4  -5   7 o   26(5)     34.     0.00 
  -4  -4   2 o   7.2(17)    5.5    0.00 
  -4  -4   3 o   71(4)     75.    180.00
  -4  -4   4 o   5.6(12)    5.4    0.00 
  -4  -4   5 o   87(5)     97.     0.00 
  -4  -4   6 o  12.5(29)   19.1   180.00
  -4  -3   4 o   155(4)    152.   180.00
  -4  -3   5 o   166(5)    177.    0.00 
  -3  -5   1 o  66.6(31)   70.3   180.00
  -3  -5   2 o   9.6(22)    9.3    0.00 
  -3  -5   3 o  48.8(35)   50.4    0.00 
  -3  -5   4 o   202(7)    191.    0.00 
  -3  -4   3 o   3.7(13)    0.7   180.00
  -3  -4   4 o  49.7(30)   60.7    0.00 
  -3  -4   5 o  31.6(29)   35.0   180.00
  -3  -3   2 o  20.1(13)   18.6    0.00 
  -3  -3   3 o  80.6(22)   82.3   180.00
  -3  -3   4 o   2.5(9)     2.0    0.00 
  -3  -3   5 o  14.7(15)    9.6    0.00 
  -2  -4   3 o   8.0(13)    9.4   180.00
  -2  -3   1 o  20.0(11)   18.7   180.00
  -2  -3   2 o  14.4(10)   14.8   180.00
  -2  -3   3 o  84.7(20)   82.8    0.00 
  -2  -2   1 o   1.14(32)   0.21  180.00
  -2  -2   2 o  18.6(9)    16.5    0.00 
  -2  -2   3 o  16.2(9)    15.0    0.00 
  -1  -1   1 o   137(4)    117.   180.00
_reflns_number_total                   73
_reflns_limit_h_min                    -10
_reflns_limit_h_max                    -1
_reflns_limit_k_min                    -11
_reflns_limit_k_max                    -1
_reflns_limit_l_min                    1
_reflns_limit_l_max                    13
_reflns_d_resolution_high              0.506
_reflns_d_resolution_low               4.683
data_UNOFA_s_40


loop_
      _refln_index_h
      _refln_index_k
      _refln_index_l
      _refln_observed_status
      _refln_F_squared_meas
      _refln_F_squared_calc
      _refln_phase_calc
 -10  -9  -5 <   29(20)     0.    180.00
 -10  -8  -8 <   17(13)     1.    180.00
 -10  -8  -5 <   59(19)     0.     0.00 
 -10  -8  -4 <   36(13)     0.     0.00 
 -10  -8  -1 <   45(17)     1.     0.00 
  -9  -9  -7 <   32(18)     3.     0.00 
  -9  -9  -1 <   12(18)     0.    180.00
  -9  -9   1 <    9(18)     0.    180.00
  -9  -8  -9 <   39(18)     3.     0.00 
  -9  -8  -6 <   20(15)     0.     0.00 
  -9  -8  -4 <   44(18)     2.     0.00 
  -9  -8  -2 <   45(19)     0.     0.00 
  -9  -7  -9 <   29(9)      3.     0.00 
  -9  -7  -2 <   34(14)     1.    180.00
  -9  -7  -1 <   50(17)    12.     0.00 
  -9  -7   0 <   39(14)    13.    180.00
  -8 -10  -8 <   20(12)     7.     0.00 
  -8 -10  -6 <   61(22)    18.     0.00 
  -8 -10  -1 <    8(19)     4.    180.00
  -8  -9 -11 <   46(14)    12.     0.00 
  -8  -9 -10 <   29(11)    14.     0.00 
  -8  -9  -9 <   20(10)     2.     0.00 
  -8  -9  -6 <   36(19)    13.    180.00
  -8  -9  -5 <   12(15)     1.     0.00 
  -8  -9  -1 <   25(15)     2.    180.00
  -8  -8  -7 <    4(13)     1.     0.00 
  -8  -8  -3 <   17(10)     0.    180.00
  -8  -8  -1 <   18(13)     3.    180.00
  -8  -8   1 <   46(17)     4.    180.00
  -8  -7  -9 <    3(8)      0.     0.00 
  -8  -7  -7 <   12(7)      0.    180.00
  -8  -7  -5 <    7(12)     4.     0.00 
  -8  -7  -4 <   43(12)    11.    180.00
  -8  -6   0 <   15(9)      2.     0.00 
  -7 -11  -1 <   16(11)     1.    180.00
  -7 -10  -4 <   54(22)     1.     0.00 
  -7 -10  -2 <   32(16)     8.    180.00
  -7  -9 -11 <   16(9)      2.     0.00 
  -7  -9  -7 <   27(16)     3.    180.00
  -7  -9  -4 <   27(14)     3.    180.00
  -7  -9  -3 <   32(14)     0.     0.00 
  -7  -8  -7 <   13(8)     17.     0.00 
  -7  -8  -4 <   23(12)     2.     0.00 
  -7  -8  -3 <    6(9)     18.    180.00
  -7  -8  -2 <   19(8)      0.    180.00
  -7  -8   0 <   29(12)    11.    180.00
  -7  -7  -7 <   129(14)   66.    180.00
  -7  -7  -5 <   42(16)    34.    180.00
  -7  -7  -2 <   38(10)    21.    180.00
  -7  -7  -1 <    2(7)      9.     0.00 
  -7  -7   0 <   12(7)      4.    180.00
  -7  -6  -6 <   29(7)      6.    180.00
  -7  -6  -5 o   41(11)    30.     0.00 
  -7  -6  -4 o   13(5)     13.    180.00
  -7  -6  -3 o   19(8)      7.     0.00 
  -7  -6  -1 o   18(6)     19.    180.00
  -7  -6   0 o   23(8)      5.    180.00
  -7  -5  -7 o   18(6)     13.    180.00
  -7  -5  -6 o    9(6)      6.    180.00
  -7  -5  -4 o    9(6)      5.    180.00
  -7  -5  -3 o   26(5)     15.    180.00
  -6 -10  -3 <   25(13)     2.    180.00
  -6  -9 -11 <   30(11)     1.     0.00 
  -6  -9 -10 <   16(10)     0.    180.00
  -6  -9  -8 <   27(14)     0.     0.00 
  -6  -9  -5 <   16(11)     1.    180.00
  -6  -9  -2 <   22(9)      2.     0.00 
  -6  -9  -1 <   15(9)      7.    180.00
  -6  -8 -10 <    5(9)      8.     0.00 
  -6  -8  -8 <   17(7)      7.    180.00
  -6  -8  -6 <   88(12)    64.    180.00
  -6  -8  -3 <   42(13)    21.    180.00
  -6  -8  -1 <   45(14)    13.    180.00
  -6  -8   0 <   27(15)     4.     0.00 
  -6  -7  -8 <   102(11)   90.    180.00
  -6  -7  -6 o   10(9)      1.     0.00 
  -6  -7  -5 o   31(11)    16.    180.00
  -6  -7  -4 o   146(12)   116.    0.00 
  -6  -7  -3 o   51(10)    24.    180.00
  -6  -7  -1 o   13(10)    25.     0.00 
  -6  -7   0 o   25(10)    34.     0.00 
  -6  -6  -8 o   10(4)      9.     0.00 
  -6  -6  -7 o   16(5)      4.    180.00
  -6  -6  -6 o   23(6)     17.     0.00 
  -6  -6  -5 o    4(8)      5.     0.00 
  -6  -6  -3 o    8(6)      1.     0.00 
  -6  -6  -1 o   11(7)      4.     0.00 
  -6  -6   0 o    7(6)      2.    180.00
  -6  -5  -5 o    7(4)      1.     0.00 
  -6  -5  -2 o   9.7(31)    8.3    0.00 
  -6  -5  -1 o   17(5)     11.     0.00 
  -6  -5   0 o   14(5)      7.     0.00 
  -6  -5   1 o   8.1(33)   11.2    0.00 
  -5  -8  -7 <   21(7)     10.    180.00
  -5  -8  -6 <   13(9)      1.    180.00
  -5  -8  -4 <   22(8)     13.    180.00
  -5  -8  -1 o   29(12)    10.     0.00 
  -5  -7  -9 o   36(8)     16.    180.00
  -5  -7  -7 o   34(6)     16.     0.00 
  -5  -7  -5 o   13(4)     14.     0.00 
  -5  -7  -1 o   12(7)      1.     0.00 
  -5  -6  -7 o    8(4)      2.     0.00 
  -5  -6  -1 o   4.2(28)    0.3    0.00 
  -5  -5  -4 o   5.6(21)    0.9   180.00
  -5  -5  -3 o   17(4)     21.    180.00
  -5  -5  -2 o   15(4)     20.     0.00 
  -5  -4  -5 o  18.1(33)   15.9   180.00
  -5  -4  -4 o   70(5)     58.     0.00 
  -5  -4  -3 o   8.5(25)   11.8   180.00
  -5  -4  -2 o   33(5)     17.     0.00 
  -5  -4   0 o   9.9(29)    9.6   180.00
  -4  -6  -7 o  14.6(33)    5.9   180.00
  -4  -6  -6 o   4.8(31)    1.9    0.00 
  -4  -6  -5 o   3.1(24)    4.7   180.00
  -4  -6  -4 o    8(4)      3.     0.00 
  -4  -6  -3 o   3.7(23)    0.0    0.00 
  -4  -6  -1 o   15(5)     14.     0.00 
  -4  -5  -5 o   3.6(17)    3.0    0.00 
  -4  -5  -4 o   15(4)     11.    180.00
  -4  -5  -3 o   2.5(27)    1.6    0.00 
  -4  -5  -2 o   5.8(23)    7.5   180.00
  -4  -4  -5 o  37.2(29)   32.8    0.00 
  -4  -4  -4 o   8.8(18)    5.7   180.00
  -4  -4  -3 o  54.1(34)   49.1   180.00
  -4  -4  -2 o  43.7(34)   42.4    0.00 
  -4  -4  -1 o  13.5(24)   13.4   180.00
  -4  -3  -4 o   6.0(13)    6.8    0.00 
  -4  -3  -3 o  46.8(28)   38.6   180.00
  -4  -3  -2 o  24.2(22)   18.7    0.00 
  -4  -3  -1 o   8.1(12)    9.1    0.00 
  -4  -3   0 o  16.0(19)   12.9    0.00 
  -3  -5  -3 o  15.0(21)   11.8    0.00 
  -3  -5  -2 o  12.0(21)    9.5   180.00
  -3  -5  -1 o   9.8(19)   15.7   180.00
  -3  -4  -5 o  34.7(29)   34.3   180.00
  -3  -4  -4 o   9.7(25)    9.1   180.00
  -3  -4  -3 o  11.0(21)    5.9    0.00 
  -3  -4  -1 o   8.3(21)    6.1    0.00 
  -3  -3  -4 o   8.0(12)    4.2    0.00 
  -3  -3  -3 o   7.8(14)    4.9   180.00
  -3  -3  -2 o   0.4(6)     0.1    0.00 
  -3  -3  -1 o  76.5(29)   59.1    0.00 
  -3  -3   0 o   2.2(9)     2.5   180.00
  -2  -3  -3 o  40.7(21)   43.5    0.00 
  -2  -3  -2 o  113.0(31)  117.2   0.00 
  -2  -3  -1 o   189(4)    186.   180.00
  -2  -2  -2 o  82.2(31)   101.5  180.00
  -2  -2  -1 o   2.9(8)     2.3    0.00 
  -2  -2   0 o  26.1(14)   24.0   180.00
  -1  -1  -1 o  24.6(31)   101.8  180.00
  -1  -1   0 o   1.2(5)     1.2   180.00
_reflns_number_total                   82
_reflns_limit_h_min                    -10
_reflns_limit_h_max                    -1
_reflns_limit_k_min                    -11
_reflns_limit_k_max                    -1
_reflns_limit_l_min                    -11
_reflns_limit_l_max                    1
_reflns_d_resolution_high              0.490
_reflns_d_resolution_low               4.748
data_UNOFA_s_41


loop_
      _refln_index_h
      _refln_index_k
      _refln_index_l
      _refln_observed_status
      _refln_F_squared_meas
      _refln_F_squared_calc
      _refln_phase_calc
  -5  -8  27 <    7(13)    1.    0.00 
  -4  -9  25 <   17(10)    0.   180.00
  -4  -8  28 <   19(11)    0.   180.00
  -4  -7  22 <   10(6)     4.   180.00
  -4  -7  23 <    1(7)     2.   180.00
  -4  -7  27 <   27(12)    1.   180.00
  -3 -10  19 <   16(15)    2.   180.00
  -3 -10  20 <   35(13)    0.    0.00 
  -3 -10  22 <   23(16)    4.   180.00
  -3  -9  20 <   12(12)    1.    0.00 
  -3  -9  25 <   17(10)    0.   180.00
  -3  -9  25 <   20(16)    0.   180.00
  -3  -9  27 <    9(12)    3.   180.00
  -3  -8  17 <   34(11)   23.   180.00
  -3  -8  20 <   17(11)    1.    0.00 
  -3  -8  21 <    9(8)     1.   180.00
  -3  -8  22 <    5(8)     3.   180.00
  -3  -8  28 <   13(19)    0.    0.00 
  -3  -7  20 <   45(14)    7.   180.00
  -3  -6  17 o   12(5)     1.    0.00 
  -3  -6  20 o   13(9)     1.   180.00
  -3  -6  21 <   31(10)   26.    0.00 
  -3  -6  22 <   23(9)     8.    0.00 
  -3  -6  23 <   23(10)    5.    0.00 
  -3  -6  24 <   16(7)     8.    0.00 
  -3  -6  25 <   12(7)    10.   180.00
  -3  -6  26 <   13(8)     2.   180.00
  -3  -5  16 o   65(6)    62.    0.00 
  -3  -5  17 o   10(4)     0.   180.00
  -2 -11  20 <   28(18)    1.   180.00
  -2 -10  18 <   14(11)    4.   180.00
  -2 -10  19 <   23(13)    1.    0.00 
  -2  -9  15 <   71(15)   35.   180.00
  -2  -9  17 <   18(10)    5.    0.00 
  -2  -9  18 <   13(14)    0.   180.00
  -2  -9  20 <    9(13)    1.    0.00 
  -2  -9  23 <   37(15)    5.    0.00 
  -2  -8  14 o   22(6)    20.   180.00
  -2  -8  21 <   20(8)     1.   180.00
  -2  -8  23 <   13(9)     2.    0.00 
  -2  -8  28 <    6(13)    0.    0.00 
  -2  -8  30 <   58(21)    0.   180.00
  -2  -8  31 <    8(20)    0.   180.00
  -2  -7  13 o   15(6)     6.   180.00
  -2  -7  14 o    4(6)     7.   180.00
  -2  -7  15 o    8(5)     0.   180.00
  -2  -7  18 o   11(8)     1.   180.00
  -2  -7  19 <   25(12)    0.   180.00
  -2  -7  20 <   16(13)    1.   180.00
  -2  -7  21 <   17(10)   10.    0.00 
  -2  -7  22 <   20(11)   17.    0.00 
  -2  -7  23 <   43(11)   33.    0.00 
  -2  -7  24 <   11(11)    3.   180.00
  -2  -7  28 <   15(16)    1.    0.00 
  -2  -6  12 o   105(8)   113.  180.00
  -2  -6  13 o   101(9)   75.   180.00
  -2  -6  14 o   9.5(35)  12.9  180.00
  -2  -6  15 o   60(9)    57.    0.00 
  -2  -6  17 o   43(12)   32.    0.00 
  -2  -6  18 o   14(7)     1.    0.00 
  -2  -6  20 o   38(9)    38.    0.00 
  -2  -6  21 o   22(10)    2.    0.00 
  -2  -6  24 <   11(10)   18.   180.00
  -2  -6  25 <   11(8)     8.   180.00
  -2  -5  12 o   7.7(32)  15.7  180.00
  -2  -5  13 o   126(8)   124.   0.00 
  -2  -5  14 o   6.9(32)   5.6   0.00 
  -2  -5  15 o   81(9)    73.    0.00 
  -2  -5  17 o   78(10)   62.   180.00
  -2  -5  18 o   29(8)    37.    0.00 
  -2  -5  19 o   33(8)    42.   180.00
  -2  -5  20 o    3(5)     9.    0.00 
  -2  -5  22 o   23(10)    9.   180.00
  -2  -4  11 o   9.6(23)   7.4  180.00
  -2  -4  12 o  16.9(28)  14.0  180.00
  -2  -4  14 o  13.0(28)  11.6  180.00
  -2  -4  15 o   47(4)    51.   180.00
  -2  -4  16 o   50(6)    59.    0.00 
  -2  -4  17 o   3.4(27)   0.0  180.00
  -1 -11  19 <   16(12)   13.   180.00
  -1 -11  22 <   32(26)    1.   180.00
  -1 -10  19 <   11(10)    5.    0.00 
  -1 -10  20 <   38(18)   16.   180.00
  -1 -10  21 <   48(21)   38.    0.00 
  -1 -10  25 <   42(25)    1.   180.00
  -1  -9  16 <    9(10)   20.    0.00 
  -1  -9  17 <   15(10)    6.    0.00 
  -1  -9  22 <   48(25)    0.   180.00
  -1  -9  23 <   27(21)   12.   180.00
  -1  -9  24 <    3(13)   15.   180.00
  -1  -9  25 <   49(18)   12.   180.00
  -1  -9  26 <   64(30)    1.   180.00
  -1  -9  27 <   162(32)   0.    0.00 
  -1  -8  17 <   10(6)     0.   180.00
  -1  -8  20 <   18(12)    0.    0.00 
  -1  -7  14 o   17(6)     3.   180.00
  -1  -6  11 o   50(7)    38.   180.00
  -1  -6  12 o    9(4)     2.    0.00 
  -1  -6  13 o   28(7)    17.   180.00
  -1  -6  14 o   24(8)    28.    0.00 
  -1  -6  17 o    9(6)     2.    0.00 
  -1  -6  18 o    2(5)     3.   180.00
  -1  -6  19 o   60(10)   51.    0.00 
  -1  -5   9 o   8.3(24)   7.5  180.00
  -1  -5  10 o   22(4)    16.   180.00
  -1  -5  12 o   6.0(23)  17.1   0.00 
  -1  -5  13 o   32(6)    29.   180.00
  -1  -5  15 o   81(9)    63.    0.00 
  -1  -5  16 o   170(11)  158.  180.00
  -1  -5  17 o   69(11)   95.    0.00 
  -1  -4   8 o   1.5(7)    2.5  180.00
  -1  -4   9 o   3.4(9)    4.2   0.00 
  -1  -4  10 o   4.7(12)   6.4  180.00
  -1  -4  11 o   7.4(20)   8.0  180.00
  -1  -4  12 o   38(4)    39.   180.00
  -1  -4  15 o   38(5)    67.    0.00 
  -1  -3   6 o   1.7(4)    1.6   0.00 
  -1  -3   7 o   2.3(8)    2.8  180.00
  -1  -3   8 o  20.6(14)  20.4   0.00 
  -1  -3   9 o  69.4(25)  68.2   0.00 
  -1  -3  10 o  50.8(28)  39.6  180.00
  -1  -3  11 o  32.7(24)  40.2   0.00 
  -1  -3  12 o   4.3(18)   0.2   0.00 
  -1  -3  13 o   41(4)    47.    0.00 
  -1  -2   6 o   1.1(4)    0.7   0.00 
  -1  -2   7 o  18.7(10)  15.5  180.00
  -1  -2   8 o   0.9(6)    1.3   0.00 
   0  -9  17 <   70(22)    0.   180.00
   0  -7  13 o   31(8)     2.   180.00
   0  -6  11 o   31(7)    17.   180.00
   0  -5   9 o   76(6)    86.   180.00
   0  -4   7 o   2.5(9)    2.8  180.00
_reflns_number_total                   68
_reflns_limit_h_min                    -5
_reflns_limit_h_max                    0
_reflns_limit_k_min                    -11
_reflns_limit_k_max                    -2
_reflns_limit_l_min                    6
_reflns_limit_l_max                    31
_reflns_d_resolution_high              0.501
_reflns_d_resolution_low               2.246
data_UNOFA_s_42


loop_
      _refln_index_h
      _refln_index_k
      _refln_index_l
      _refln_observed_status
      _refln_F_squared_meas
      _refln_F_squared_calc
      _refln_phase_calc
  -8 -10  13 <    6(14)     0.     0.00 
  -8 -10  15 <   15(10)     0.     0.00 
  -8  -9  18 <   31(12)     9.     0.00 
  -8  -8  15 <   21(9)     26.     0.00 
  -8  -8  16 <   36(13)    32.     0.00 
  -8  -8  17 <   54(15)    16.     0.00 
  -8  -8  22 <   20(18)     0.    180.00
  -8  -7  18 <   51(16)    33.    180.00
  -7 -10  10 <   19(11)     0.     0.00 
  -7 -10  11 <   43(15)     0.     0.00 
  -7 -10  15 <   29(18)     0.    180.00
  -7  -9  12 <    9(8)      0.     0.00 
  -7  -9  13 <   27(12)    16.    180.00
  -7  -9  14 <   21(10)    17.     0.00 
  -7  -9  16 <   20(11)    12.     0.00 
  -7  -9  17 <   12(11)     6.     0.00 
  -7  -9  19 <   23(16)     0.    180.00
  -7  -8  14 <   20(8)     16.     0.00 
  -7  -8  15 <   30(9)     20.     0.00 
  -7  -8  19 <   10(10)     1.    180.00
  -7  -8  20 <   30(16)    16.    180.00
  -7  -8  24 <   46(17)     9.     0.00 
  -7  -7  13 <    8(8)      2.    180.00
  -7  -7  16 <   20(13)     1.    180.00
  -7  -7  17 <   14(11)     7.    180.00
  -7  -7  19 <   25(17)     7.     0.00 
  -6 -11  14 <   28(17)     3.     0.00 
  -6 -11  15 <   56(21)     1.     0.00 
  -6 -10  12 <    9(9)      0.     0.00 
  -6 -10  18 <   34(24)     0.     0.00 
  -6  -9   9 <   11(6)      0.     0.00 
  -6  -9  10 <   18(10)     0.     0.00 
  -6  -9  12 <   65(13)    40.    180.00
  -6  -9  20 <   16(11)    15.     0.00 
  -6  -9  21 <   19(13)    22.    180.00
  -6  -9  24 <   30(24)     9.    180.00
  -6  -9  25 <   15(12)     9.     0.00 
  -6  -8  10 <   25(7)     12.    180.00
  -6  -8  11 <   10(6)      1.    180.00
  -6  -8  19 <   14(14)     5.    180.00
  -6  -8  22 <   52(16)    30.    180.00
  -6  -8  23 <   35(16)    23.     0.00 
  -6  -7  12 <   19(9)     10.     0.00 
  -6  -7  16 <    4(7)      0.     0.00 
  -6  -7  19 <    7(9)      1.    180.00
  -6  -7  20 <   29(19)     6.    180.00
  -6  -7  21 <   36(20)     0.     0.00 
  -6  -6  15 <   18(9)      0.     0.00 
  -6  -6  18 <   146(20)   25.    180.00
  -5 -11  16 <   10(11)     3.    180.00
  -5 -10  15 <   26(14)     0.     0.00 
  -5 -10  17 <   30(17)     1.     0.00 
  -5 -10  19 <   11(15)     1.     0.00 
  -5 -10  20 <   44(21)     2.    180.00
  -5  -9  10 <    3(7)     15.    180.00
  -5  -9  11 <   14(11)    10.    180.00
  -5  -9  14 <   11(8)      0.    180.00
  -5  -9  15 <   23(8)      3.     0.00 
  -5  -8   8 <   34(6)     23.    180.00
  -5  -8   9 <   68(12)    29.    180.00
  -5  -8  10 <    9(8)     13.     0.00 
  -5  -8  11 <   19(8)     20.     0.00 
  -5  -8  12 <   32(11)    28.     0.00 
  -5  -8  13 <   17(11)     9.     0.00 
  -5  -8  16 <    9(7)      1.     0.00 
  -5  -7   8 o   6.4(29)    1.5    0.00 
  -5  -7   9 o    7(5)      6.     0.00 
  -5  -7  10 o   19(4)     11.     0.00 
  -5  -7  19 <   22(10)     2.    180.00
  -5  -7  21 <   52(14)     2.     0.00 
  -5  -6  10 o   9.8(31)   10.2    0.00 
  -5  -6  14 o    7(4)      2.     0.00 
  -5  -6  15 o   10(7)      1.    180.00
  -5  -6  17 o   40(7)     26.    180.00
  -5  -6  20 <   37(13)    45.     0.00 
  -5  -5   9 o   18(4)      4.     0.00 
  -5  -5  10 o  10.4(27)    6.7   180.00
  -5  -5  11 o   17(5)      4.     0.00 
  -5  -5  13 o    7(5)      0.     0.00 
  -4 -11  16 <   53(22)     1.    180.00
  -4 -10  15 <    9(9)      1.    180.00
  -4  -9  12 <   22(12)     1.     0.00 
  -4  -9  13 <   12(6)      5.     0.00 
  -4  -9  17 <   10(15)     0.    180.00
  -4  -8  11 o   11(6)      3.     0.00 
  -4  -8  15 <   22(7)      9.    180.00
  -4  -8  17 <   17(11)    19.    180.00
  -4  -7   8 o    2(4)      6.     0.00 
  -4  -7  12 o   13(6)      8.    180.00
  -4  -7  14 o   12(7)     10.     0.00 
  -4  -6   7 o   38(6)     35.     0.00 
  -4  -6  10 o   25(5)     23.     0.00 
  -4  -6  11 o   32(6)     13.     0.00 
  -4  -6  12 o   15(5)     24.     0.00 
  -4  -6  15 o    6(6)      3.    180.00
  -4  -6  16 o    4(4)      5.    180.00
  -4  -5   7 o   37(4)     34.     0.00 
  -4  -5   8 o   7.5(32)    1.3   180.00
  -4  -5  10 o  11.0(31)    8.9    0.00 
  -4  -5  11 o  10.6(34)    2.4   180.00
  -4  -5  13 o   9.7(29)    8.8    0.00 
  -4  -5  14 o   27(7)     21.    180.00
  -4  -5  15 o   19(7)     21.    180.00
  -4  -4   8 o  35.8(29)   30.6   180.00
  -4  -4  10 o  14.4(26)    9.6    0.00 
  -4  -4  12 o   55(5)     32.     0.00 
  -3  -7   9 o   11(4)      4.    180.00
  -3  -7  11 o   19(5)     21.     0.00 
  -3  -7  12 o   16(6)     10.     0.00 
  -3  -6   7 o  12.9(28)    8.1    0.00 
  -3  -6   8 o   19(6)     11.     0.00 
  -3  -6   9 o   42(5)     48.     0.00 
  -3  -6  10 o  11.1(35)    5.8    0.00 
  -3  -6  11 o   53(7)     52.     0.00 
  -3  -6  12 o   24(6)     16.    180.00
  -3  -6  13 o   75(8)     56.    180.00
  -3  -5   6 o   1.0(16)    0.1    0.00 
  -3  -5   8 o   114(5)    111.   180.00
  -3  -5  11 o   32(5)     35.    180.00
  -3  -5  12 o   83(6)     63.    180.00
  -3  -5  13 o   55(5)     49.    180.00
  -3  -4   5 o  36.3(22)   35.0   180.00
  -3  -4   6 o   1.4(9)     2.8   180.00
  -3  -4   7 o   4.1(13)    5.1    0.00 
  -3  -4   8 o  25.7(29)   26.3   180.00
  -3  -4   9 o   4.2(12)    5.7    0.00 
  -3  -4  10 o   7.8(22)    8.5    0.00 
  -3  -4  12 o   40(4)     30.    180.00
  -3  -3   6 o  57.3(24)   54.7   180.00
  -3  -3   7 o  15.5(17)   11.9    0.00 
  -3  -3   9 o  31.5(21)   25.0    0.00 
  -2  -5   7 o   109(4)    102.   180.00
  -2  -5   8 o   2.4(12)    1.5   180.00
  -2  -4   5 o   5.2(13)    5.1    0.00 
  -2  -4   6 o   2.2(10)    0.3    0.00 
  -2  -4   8 o  17.1(18)   16.4   180.00
  -2  -3   3 o  71.6(26)   82.8    0.00 
  -2  -3   4 o   2.2(9)     3.0   180.00
  -2  -3   5 o   4.0(9)     3.9   180.00
  -2  -3   6 o  23.3(19)   24.5   180.00
  -2  -3   7 o  26.4(17)   27.3   180.00
  -2  -3   8 o   3.3(9)     2.4   180.00
  -2  -2   4 o  50.1(21)   54.9    0.00 
  -2  -2   5 o  15.3(14)   18.6    0.00 
  -2  -2   6 o  29.1(15)   22.1    0.00 
  -1  -2   4 o   0.37(30)   0.72   0.00 
  -1  -1   2 o   4.0(9)     7.9    0.00 
  -1  -1   3 o  24.3(18)   31.4    0.00 
_reflns_number_total                   73
_reflns_limit_h_min                    -8
_reflns_limit_h_max                    -1
_reflns_limit_k_min                    -11
_reflns_limit_k_max                    -1
_reflns_limit_l_min                    2
_reflns_limit_l_max                    25
_reflns_d_resolution_high              0.496
_reflns_d_resolution_low               4.378
data_UNOFA_s_43


loop_
      _refln_index_h
      _refln_index_k
      _refln_index_l
      _refln_observed_status
      _refln_F_squared_meas
      _refln_F_squared_calc
      _refln_phase_calc
   1  -2   4 o  30.2(12)   29.7    0.00 
   1  -2   5 o  13.2(10)   12.9   180.00
   1  -2   6 o   4.0(6)     2.4    0.00 
   1  -1   3 o  187.1(29)  180.6  180.00
   1  -1   4 o  19.0(9)    16.9    0.00 
   2  -5  10 o   11(4)     21.    180.00
   2  -5  11 o   6.1(23)    5.5   180.00
   2  -4   7 o  34.5(29)   39.0   180.00
   2  -4   8 o  14.8(24)   19.5   180.00
   2  -4   9 o   177(5)    180.   180.00
   2  -4  10 o   7.1(15)   11.0    0.00 
   2  -4  11 o   71(4)     69.     0.00 
   2  -4  12 o   1.7(11)    0.8    0.00 
   2  -3   5 o   2.9(11)    3.4   180.00
   2  -3   6 o  27.3(15)   30.1   180.00
   2  -3   7 o   0.4(6)     2.0   180.00
   2  -3   8 o   2.1(10)    0.1    0.00 
   2  -3   9 o  42.2(22)   44.2    0.00 
   2  -3  10 o  85.0(31)   88.2    0.00 
   2  -3  11 o  31.4(25)   32.1    0.00 
   2  -3  12 o  65.7(35)   63.4    0.00 
   2  -3  13 o   6.3(15)    6.8   180.00
   2  -2   6 o  53.2(17)   53.2    0.00 
   2  -2   7 o  55.5(19)   55.6   180.00
   2  -2   8 o   5.9(9)     6.6    0.00 
   3  -7  13 o   129(12)   120.    0.00 
   3  -7  15 o   16(7)      8.    180.00
   3  -6  10 o    2(4)      4.     0.00 
   3  -6  11 o   13(4)     13.     0.00 
   3  -6  12 o  10.6(33)   12.2    0.00 
   3  -5   7 o   16(4)      5.    180.00
   3  -5   8 o   6.5(20)    3.5   180.00
   3  -5   9 o  11.1(25)   15.7    0.00 
   3  -5  10 o   16(5)      8.    180.00
   3  -5  11 o   11(4)     17.     0.00 
   3  -5  13 o    9(4)      2.    180.00
   3  -5  14 o   1.7(25)    3.4   180.00
   3  -5  16 o   13(6)     14.     0.00 
   3  -5  21 o   12(4)      7.    180.00
   3  -4   8 o  11.8(29)   10.4    0.00 
   3  -4   9 o   20(4)     25.     0.00 
   3  -4  10 o  26.4(34)   38.2    0.00 
   3  -4  12 o   6.5(22)    8.1    0.00 
   3  -4  15 o   6.4(22)    1.2   180.00
   3  -4  16 o   32(6)     29.    180.00
   3  -4  17 o    9(4)      2.    180.00
   3  -4  18 o   35(6)     40.    180.00
   3  -3   9 o   72(4)     75.     0.00 
   3  -3  10 o  21.2(33)   26.3   180.00
   3  -3  11 o   4.5(15)    4.8    0.00 
   3  -3  12 o   77(5)     82.    180.00
   3  -3  13 o   27(4)     23.    180.00
   3  -3  14 o   23(5)     20.     0.00 
   4 -10  19 <   15(8)      2.     0.00 
   4 -10  21 <   19(15)     4.    180.00
   4  -9  16 <   19(6)      4.    180.00
   4  -8  15 <   16(10)     5.     0.00 
   4  -8  17 <   14(10)    12.     0.00 
   4  -8  20 <   58(13)    44.    180.00
   4  -8  22 <    4(10)     1.    180.00
   4  -7  12 o    3(6)      2.    180.00
   4  -7  14 <   72(12)    74.    180.00
   4  -7  16 <   25(10)    12.    180.00
   4  -7  17 <   28(10)    12.    180.00
   4  -7  18 <   17(7)     10.    180.00
   4  -7  19 <   22(10)    11.    180.00
   4  -7  21 <   29(12)     0.    180.00
   4  -7  22 <   67(13)    47.     0.00 
   4  -7  24 <   26(9)     18.     0.00 
   4  -6  14 o   15(7)      0.     0.00 
   4  -6  16 o    9(5)      7.     0.00 
   4  -6  19 <    5(6)      3.    180.00
   4  -6  20 <   20(6)      6.     0.00 
   4  -6  22 <    5(9)      5.     0.00 
   4  -6  24 <   26(10)    10.    180.00
   4  -6  25 <   43(16)     1.     0.00 
   4  -5  10 o   8.0(29)    4.0    0.00 
   4  -5  11 o   21(7)     24.    180.00
   4  -5  13 o   16(6)      1.     0.00 
   4  -5  14 o   15(4)     17.    180.00
   4  -5  15 o   33(7)     33.     0.00 
   4  -4  12 o    2(4)      0.     0.00 
   4  -4  13 o   4.4(35)   13.7    0.00 
   4  -4  16 o   11(7)      4.    180.00
   4  -4  17 o   79(11)    49.    180.00
   4  -3  14 o   11(5)      4.     0.00 
   5 -10  18 <   14(13)     0.     0.00 
   5 -10  19 <   14(13)     0.    180.00
   5 -10  20 <   32(18)     0.    180.00
   5  -9  17 <   23(15)     1.     0.00 
   5  -9  18 <   56(16)     8.    180.00
   5  -8  13 <   14(8)     12.    180.00
   5  -8  17 <   45(16)     5.    180.00
   5  -8  25 <   37(22)     2.     0.00 
   5  -7  19 <   42(12)    25.     0.00 
   5  -7  21 <   70(15)    43.     0.00 
   5  -7  23 <   40(16)     8.    180.00
   5  -6  14 o   11(6)      8.     0.00 
   5  -6  20 <    5(9)      1.     0.00 
   5  -6  21 <   28(12)     5.    180.00
   5  -6  22 <    1(7)      1.     0.00 
   5  -6  23 <    8(11)     2.    180.00
   5  -6  24 <   17(11)     1.     0.00 
   5  -5  15 o   10(9)      0.     0.00 
   5  -5  17 o   36(10)     6.     0.00 
   5  -5  20 <    4(6)      1.     0.00 
   5  -5  22 <   19(7)      2.    180.00
   5  -4  17 o   36(6)      4.    180.00
   5  -4  19 o    7(8)      2.    180.00
   6 -10  14 <   29(19)     7.    180.00
   6 -10  17 <   47(16)     0.    180.00
   6  -9  14 <   17(14)     0.    180.00
   6  -9  15 <    2(11)     1.    180.00
   6  -9  16 <   16(16)     5.     0.00 
   6  -7  21 <   14(10)     1.    180.00
   6  -7  26 <   26(15)     1.    180.00
   6  -6  19 <   20(14)     0.    180.00
   6  -6  25 <   33(14)     0.    180.00
   6  -5  21 <   19(12)    20.     0.00 
   6  -5  24 <   27(13)    15.    180.00
   6  -5  25 <   14(9)      7.    180.00
   7  -9  17 <   137(26)    0.    180.00
   7  -8  20 <   31(18)     0.    180.00
   7  -7  21 <   16(17)     0.     0.00 
   7  -6  25 <   31(14)     2.     0.00 
   7  -5  25 <   32(17)     0.     0.00 
_reflns_number_total                   71
_reflns_limit_h_min                    1
_reflns_limit_h_max                    7
_reflns_limit_k_min                    -10
_reflns_limit_k_max                    -1
_reflns_limit_l_min                    3
_reflns_limit_l_max                    26
_reflns_d_resolution_high              0.501
_reflns_d_resolution_low               3.706
data_UNOFA_s_44


loop_
      _refln_index_h
      _refln_index_k
      _refln_index_l
      _refln_observed_status
      _refln_F_squared_meas
      _refln_F_squared_calc
      _refln_phase_calc
  -1 -10  23 <   38(16)     7.     0.00 
  -1 -10  25 <   18(9)      1.    180.00
  -1  -9  23 <   11(7)     12.    180.00
  -1  -9  24 <   25(12)    15.    180.00
  -1  -9  26 <   32(15)     1.    180.00
  -1  -9  28 <    1(9)      0.    180.00
  -1  -8  19 <    6(6)      1.    180.00
  -1  -8  21 <   20(7)      5.     0.00 
  -1  -8  22 <    6(6)      0.     0.00 
  -1  -8  31 <   13(10)     2.     0.00 
  -1  -7  20 <    6(4)      7.     0.00 
  -1  -7  21 <   19(6)      0.    180.00
  -1  -7  27 <    1(9)      1.    180.00
  -1  -7  30 <    7(8)      0.    180.00
  -1  -7  31 <   40(13)     1.    180.00
  -1  -7  33 <   58(19)    10.    180.00
  -1  -6  26 <   19(9)      8.     0.00 
   0 -10  26 <   24(17)     7.    180.00
   0  -9  20 <   13(10)     0.     0.00 
   0  -9  22 <   30(11)    11.    180.00
   0  -9  23 <   22(9)     27.    180.00
   0  -9  25 <   13(9)      4.     0.00 
   0  -9  26 <   12(10)     5.     0.00 
   0  -8  18 <   25(6)     18.     0.00 
   0  -8  19 <   17(7)     12.    180.00
   0  -8  20 <    0(6)      2.    180.00
   0  -8  22 <    4(6)      4.    180.00
   0  -8  23 <    5(9)      3.     0.00 
   0  -8  24 <   12(9)      2.     0.00 
   0  -8  25 <    8(7)      0.    180.00
   0  -8  26 <   22(12)     7.    180.00
   0  -8  27 <   41(17)     0.    180.00
   0  -8  31 <   24(11)     0.    180.00
   0  -7  17 o    8(5)      8.    180.00
   0  -7  20 <   15(7)     17.    180.00
   0  -7  21 <   18(7)     12.     0.00 
   0  -7  22 <   13(7)     13.    180.00
   0  -7  25 <    9(15)     3.    180.00
   0  -7  26 <   24(10)     1.     0.00 
   0  -7  30 <    7(12)     1.     0.00 
   0  -7  31 <   17(17)     1.     0.00 
   0  -6  15 o   6.7(28)    0.0   180.00
   0  -6  16 o   23(7)     26.     0.00 
   0  -6  19 o   13(6)      8.     0.00 
   0  -5  11 o  16.1(28)   13.8    0.00 
   0  -5  12 o   6.7(19)    9.3   180.00
   0  -5  13 o  15.7(28)   13.8    0.00 
   0  -5  16 o   24(4)     23.     0.00 
   0  -5  17 o   6.7(30)    2.1    0.00 
   0  -5  18 o   11(4)      6.    180.00
   0  -5  19 o   11(4)      0.    180.00
   0  -5  20 o    3(4)      1.    180.00
   0  -5  22 o    8(4)      9.    180.00
   0  -5  23 o   12(5)      0.     0.00 
   0  -5  24 <   23(8)     28.    180.00
   0  -4   9 o  13.1(16)   13.7    0.00 
   0  -4  10 o  14.9(22)   14.6   180.00
   0  -4  13 o  11.0(26)    4.1    0.00 
   0  -4  14 o  34.3(27)   33.5    0.00 
   0  -4  15 o  32.5(33)   33.1    0.00 
   0  -4  16 o   4.8(15)    3.6   180.00
   0  -4  17 o   20(4)     22.    180.00
   0  -4  18 o   5.1(20)    7.9    0.00 
   0  -4  19 o   10(4)      5.    180.00
   0  -3   7 o   9.4(12)    9.9   180.00
   0  -3   8 o   8.0(12)    6.8    0.00 
   0  -3   9 o   1.6(8)     1.8   180.00
   0  -3  10 o   4.8(11)    2.8    0.00 
   0  -3  11 o   2.2(10)    0.6    0.00 
   0  -3  12 o  16.6(19)   15.9    0.00 
   0  -3  14 o  40.5(26)   35.2    0.00 
   0  -2   5 o   1.1(5)     0.1   180.00
   0  -2   6 o   8.9(12)    7.0   180.00
   0  -2   7 o  38.9(19)   41.5    0.00 
   0  -2   8 o  46.5(20)   48.1    0.00 
   0  -2   9 o   0.4(6)     0.0    0.00 
   0  -1   3 o   0.21(33)   1.68   0.00 
   0  -1   4 o  39.0(28)   62.6    0.00 
   1  -9  20 <   15(7)      1.    180.00
   1  -9  22 <   23(14)     0.     0.00 
   1  -9  25 <   34(14)     1.     0.00 
   1  -8  19 <   27(12)    12.    180.00
   1  -8  20 <   25(10)    21.     0.00 
   1  -8  21 <   12(10)    15.    180.00
   1  -8  26 <   28(12)     1.    180.00
   1  -8  29 <   26(10)     9.     0.00 
   1  -7  15 o    5(4)     13.     0.00 
   1  -7  16 o    4(4)      0.    180.00
   1  -7  17 o   21(6)     24.    180.00
   1  -7  18 o   18(5)     16.     0.00 
   1  -7  19 <   22(8)     25.    180.00
   1  -7  20 <   15(7)     18.     0.00 
   1  -7  22 <   10(7)      7.    180.00
   1  -7  23 <   13(13)     0.    180.00
   1  -7  25 <   55(14)    43.     0.00 
   1  -7  27 <   73(19)    49.     0.00 
   1  -7  29 <   28(14)    15.    180.00
   1  -7  30 <   28(18)    18.     0.00 
   1  -7  31 <    5(17)    15.    180.00
   1  -6  14 o  10.5(28)    8.8    0.00 
   1  -6  16 o  10.9(32)    5.7    0.00 
   1  -6  20 o    8(4)      5.    180.00
   1  -6  22 <   13(7)      1.     0.00 
   1  -6  29 <   34(10)    14.    180.00
   1  -5  10 o   139(5)    136.    0.00 
   1  -5  11 o   90(5)     88.    180.00
   1  -5  12 o   4.2(13)    0.0    0.00 
   1  -5  13 o   3.8(20)    0.5    0.00 
   1  -5  14 o   1.2(19)    1.0   180.00
   1  -5  16 o  10.2(24)   10.5   180.00
   1  -5  17 o   3.6(27)    9.4   180.00
   1  -5  20 o   11(4)      4.     0.00 
   1  -5  21 o   13(7)      1.    180.00
   1  -4   9 o  115.4(34)  111.3  180.00
   1  -4  10 o  40.7(25)   39.7   180.00
   1  -4  12 o   80(4)     82.    180.00
   1  -4  13 o   63(4)     63.     0.00 
   1  -4  14 o  12.6(20)   16.5    0.00 
   1  -4  15 o   2.6(26)    2.2    0.00 
   1  -4  16 o   8.1(29)    1.8    0.00 
   1  -3   9 o  38.0(18)   33.1   180.00
   1  -3  10 o  14.1(26)   11.0   180.00
   1  -3  12 o  56.2(25)   56.7    0.00 
   1  -3  13 o  16.6(22)   15.6    0.00 
   1  -3  14 o  15.3(27)   16.1   180.00
   2 -10  20 <   13(9)      1.     0.00 
   2  -9  18 <   19(7)      2.     0.00 
   2  -9  21 <   45(17)     7.    180.00
   2  -9  22 <   36(16)     2.    180.00
   2  -8  22 <   28(14)     0.    180.00
   2  -8  23 <   32(14)     3.    180.00
   2  -8  26 <   38(15)    29.     0.00 
   2  -8  26 <   31(11)    29.     0.00 
   2  -8  29 <   19(12)     1.     0.00 
   2  -7  21 <   13(7)      2.    180.00
   2  -7  22 <   11(9)      0.     0.00 
   2  -7  24 <   20(9)     21.     0.00 
   2  -7  26 <   11(14)     3.     0.00 
   2  -7  28 <   28(11)    39.    180.00
   2  -7  29 <   19(14)     7.     0.00 
   2  -7  31 <   27(11)     0.    180.00
   2  -6  26 <   21(11)    18.    180.00
   2  -5  18 o    8(5)      5.     0.00 
   2  -5  19 o   14(6)      5.     0.00 
   2  -5  22 o   14(5)     10.    180.00
   2  -5  24 <   13(7)      0.    180.00
   3  -8  27 <    6(11)     0.    180.00
   3  -7  27 <   80(14)     8.    180.00
   3  -7  29 <   20(13)     2.     0.00 
_reflns_number_total                   68
_reflns_limit_h_min                    -1
_reflns_limit_h_max                    3
_reflns_limit_k_min                    -10
_reflns_limit_k_max                    -1
_reflns_limit_l_min                    3
_reflns_limit_l_max                    33
_reflns_d_resolution_high              0.499
_reflns_d_resolution_low               4.655
data_UNOFA_s_45


loop_
      _refln_index_h
      _refln_index_k
      _refln_index_l
      _refln_observed_status
      _refln_F_squared_meas
      _refln_F_squared_calc
      _refln_phase_calc
   1  -1   0 o   1.64(28)   1.22  180.00
   2  -2   0 o  26.1(9)    24.0   180.00
   2  -2   1 o   2.1(5)     2.3   180.00
   2  -1   0 o  89.1(16)   84.3   180.00
   2  -1   1 o  43.1(14)   47.7    0.00 
   3  -3  -1 o   1.3(6)     1.4   180.00
   3  -3   0 o   5.2(8)     2.5   180.00
   3  -3   1 o  64.6(19)   59.1   180.00
   3  -2   0 o  105.8(21)  106.6   0.00 
   3  -2   2 o   1.9(5)     1.1    0.00 
   3  -1   0 o   0.8(4)     0.4   180.00
   4  -4  -1 o   62(4)     62.     0.00 
   4  -4   1 o  10.1(16)   13.4    0.00 
   4  -4   2 o  39.3(26)   42.4    0.00 
   4  -3  -1 o  11.7(21)   12.6   180.00
   4  -3   0 o  13.1(19)   12.9   180.00
   4  -3   1 o   8.3(16)    9.1    0.00 
   4  -3   2 o  18.6(16)   18.7   180.00
   4  -2   0 o  74.8(26)   71.3   180.00
   4  -2   1 o  43.3(21)   50.9    0.00 
   4  -2   3 o   0.9(7)     0.6   180.00
   5  -5   0 o   3.2(20)    1.4    0.00 
   5  -5   2 o   23(5)     20.     0.00 
   5  -5   3 o   22(4)     21.     0.00 
   5  -4  -1 o   14(4)     12.     0.00 
   5  -4   0 o   6.9(26)    9.6    0.00 
   5  -4   2 o  14.2(24)   17.1   180.00
   5  -4   3 o  11.7(26)   11.8   180.00
   5  -3  -1 o   91(5)     91.    180.00
   5  -3   0 o  13.0(33)   14.3    0.00 
   5  -3   1 o  22.8(30)   34.7   180.00
   5  -3   2 o   9.3(19)   13.1   180.00
   5  -3   3 o   101(4)    109.   180.00
   5  -2   1 o   9.7(16)   15.2   180.00
   5  -2   2 o   0.5(8)     0.1    0.00 
   6  -6  -1 o   16(5)     20.    180.00
   6  -6   2 o   18(7)      5.    180.00
   6  -6   4 o   15(4)      8.    180.00
   6  -5  -1 o    8(4)     11.     0.00 
   6  -5   0 o   9.2(34)    7.4   180.00
   6  -5   1 o   11(4)     11.     0.00 
   6  -5   2 o    8(4)      8.    180.00
   6  -5   4 o   3.4(26)    2.3    0.00 
   6  -4  -1 o   11(6)      0.     0.00 
   6  -4   0 o   3.5(26)    0.1   180.00
   6  -4   2 o   4.2(32)    0.0    0.00 
   6  -4   3 o   38(5)     46.    180.00
   6  -4   4 o   7.5(24)   10.1   180.00
   6  -3   0 o   3.0(21)    8.3   180.00
   6  -3   1 o    5(4)      2.    180.00
   6  -3   2 o   3.4(19)    2.2    0.00 
   6  -3   3 o   19(4)     22.     0.00 
   6  -3   4 o   19(4)     13.     0.00 
   6  -2   1 o   56(5)     54.    180.00
   7  -7  -1 <   19(8)      2.    180.00
   7  -7   1 <    9(6)      9.    180.00
   7  -7   2 <   22(6)     21.    180.00
   7  -7   3 <   15(7)      6.    180.00
   7  -6  -2 o   24(9)      9.    180.00
   7  -6   1 o   13(5)     19.    180.00
   7  -6   4 o   12(5)     13.     0.00 
   7  -5  -2 o   43(9)     31.     0.00 
   7  -5  -1 o   16(6)     14.    180.00
   7  -5   0 o    4(4)      0.    180.00
   7  -5   1 o   15(6)      7.     0.00 
   7  -5   3 o   13(7)     15.     0.00 
   7  -4   0 o   86(9)     76.    180.00
   7  -4   1 o   22(6)     28.     0.00 
   7  -4   3 o    9(4)      5.     0.00 
   7  -4   5 o    9(4)      0.    180.00
   7  -3   1 o   3.4(30)    0.4    0.00 
   7  -3   2 o    7(4)      1.    180.00
   7  -3   5 o   4.0(23)    3.6   180.00
   8  -8  -3 <   99(16)     9.    180.00
   8  -8  -2 <   34(12)     1.     0.00 
   8  -8  -1 <   25(9)      4.     0.00 
   8  -8   1 <   17(6)      3.     0.00 
   8  -8   5 <   12(8)      0.    180.00
   8  -7  -3 <   68(15)    11.     0.00 
   8  -7  -2 <   23(10)     3.     0.00 
   8  -7  -1 <   15(9)      0.    180.00
   8  -7   1 <   24(12)     2.    180.00
   8  -7   2 <   14(11)     0.    180.00
   8  -7   3 <    1(6)      1.     0.00 
   8  -7   5 <   11(8)      4.     0.00 
   8  -6   0 <   12(8)      2.     0.00 
   8  -6   1 <   11(8)      0.    180.00
   8  -6   2 <    5(6)      1.     0.00 
   8  -5  -1 o   12(7)      5.    180.00
   8  -5   3 o   10(7)      1.     0.00 
   8  -5   4 <    9(5)      1.     0.00 
   8  -5   5 <   14(7)      1.    180.00
   8  -4   5 o   61(11)    67.     0.00 
   8  -4   6 o   29(7)     18.    180.00
   8  -3   3 o   12(5)      3.    180.00
   9  -8   1 <   63(16)     3.    180.00
   9  -8   2 <   17(13)     0.    180.00
   9  -8   4 <   28(15)     2.    180.00
   9  -8   5 <   21(11)     1.    180.00
   9  -7   0 <    9(7)     13.    180.00
   9  -7   1 <   30(8)     12.    180.00
   9  -7   2 <    5(7)      1.    180.00
   9  -6  -2 <   19(7)      3.    180.00
   9  -6   6 <   10(8)      1.     0.00 
   9  -5  -2 <   32(8)      0.    180.00
   9  -5   3 <   29(8)     10.     0.00 
   9  -4   5 <   12(5)      9.    180.00
   9  -4   6 <   11(5)      4.    180.00
   9  -3   0 o   20(7)      1.    180.00
   9  -3   1 o    6(7)      0.    180.00
  10  -9  -3 <   25(17)     2.     0.00 
  10  -9   0 <    9(16)     1.    180.00
  10  -8   0 <   14(11)     2.    180.00
  10  -8   3 <   24(16)     0.     0.00 
  10  -8   4 <   13(15)     0.     0.00 
  10  -8   7 <   11(8)      0.     0.00 
  10  -7  -2 <   43(14)    16.    180.00
  10  -7   2 <   29(13)     5.     0.00 
  10  -7   3 <   30(16)     1.     0.00 
  10  -7   7 <   27(14)     1.     0.00 
  10  -6   6 <   16(7)      1.     0.00 
  10  -5  -1 <   30(15)     5.    180.00
  10  -5   5 <    7(7)      0.     0.00 
  10  -5   6 <   23(9)      1.    180.00
  10  -5   7 <    5(6)      0.    180.00
  10  -5   8 <    8(9)      1.     0.00 
  10  -4   0 <   18(17)    11.     0.00 
  10  -4   4 <   40(9)     12.    180.00
  11  -7   2 <   13(10)     0.     0.00 
  11  -6  -1 <   20(10)     0.    180.00
  11  -5  -1 <    2(10)     0.    180.00
  11  -5   0 <   11(16)     1.    180.00
  11  -5   1 <   19(10)    22.     0.00 
  11  -5   2 <   29(13)    19.     0.00 
  11  -5   3 <   14(12)     1.     0.00 
  11  -5   8 <   12(13)     1.    180.00
  11  -4   2 <   53(12)    32.     0.00 
  12  -5   3 <   15(11)     7.    180.00
  12  -5   5 <   23(15)     5.    180.00
  12  -4   0 <    6(10)     4.    180.00
  12  -4   1 <   23(20)     2.    180.00
  12  -4   3 <   39(16)     6.    180.00
_reflns_number_total                   76
_reflns_limit_h_min                    1
_reflns_limit_h_max                    12
_reflns_limit_k_min                    -9
_reflns_limit_k_max                    -1
_reflns_limit_l_min                    -3
_reflns_limit_l_max                    8
_reflns_d_resolution_high              0.499
_reflns_d_resolution_low               4.748
data_UNOFA_s_46


loop_
      _refln_index_h
      _refln_index_k
      _refln_index_l
      _refln_observed_status
      _refln_F_squared_meas
      _refln_F_squared_calc
      _refln_phase_calc
   1  -1   2 o   6.0(13)  11.8  180.00
   2  -2   3 o   7.9(9)    9.1   0.00 
   2  -2   4 o   5.5(9)    7.4   0.00 
   2  -1   3 o   4.0(7)    3.8  180.00
   3  -4   8 o   9.3(22)  10.4   0.00 
   3  -4   9 o  25.5(25)  25.5   0.00 
   3  -3   4 o   4.7(11)   4.2   0.00 
   3  -3   5 o  26.0(19)  25.7   0.00 
   3  -3   7 o  45.4(25)  47.1   0.00 
   3  -3   8 o  32.5(20)  31.9   0.00 
   3  -2   4 o  45.3(20)  45.2  180.00
   3  -2   5 o   4.6(9)    4.6   0.00 
   3  -2   6 o   3.2(11)   4.6  180.00
   3  -2   7 o  93.7(29)  94.2   0.00 
   3  -2   8 o  24.6(18)  23.3  180.00
   4  -5   8 o   6.3(24)   0.0  180.00
   4  -5  10 o   4.9(18)   4.0   0.00 
   4  -5  11 o  19.9(29)  23.7  180.00
   4  -4   5 o  32.3(30)  32.8  180.00
   4  -4   6 o  27.5(29)  27.0  180.00
   4  -4   7 o   6.4(22)  10.4  180.00
   4  -4   9 o  21.2(25)  22.1   0.00 
   4  -3   5 o  22.5(23)  22.0  180.00
   4  -3   6 o   1.5(13)   1.4   0.00 
   4  -3   7 o   8.7(19)   8.4   0.00 
   4  -3   8 o   5.2(15)   4.3   0.00 
   4  -3   9 o   6.3(16)   4.4  180.00
   4  -3  10 o  32.9(29)  26.9  180.00
   4  -2   5 o   1.5(9)    1.7  180.00
   4  -2   6 o   2.4(9)    4.0   0.00 
   4  -2   7 o  15.5(17)  12.1  180.00
   5  -7  16 <   33(7)    19.   180.00
   5  -6  12 o   24(7)     7.   180.00
   5  -5   7 o   18(5)    10.   180.00
   5  -5   9 o    6(4)     1.   180.00
   5  -5  11 o    7(4)     8.   180.00
   5  -5  12 o   24(5)    19.    0.00 
   5  -4   7 o   2.9(19)   3.8  180.00
   5  -4   8 o   28(4)    27.    0.00 
   5  -4   9 o   1.9(28)   5.3  180.00
   5  -4  10 o   27(5)    26.    0.00 
   5  -4  13 o   39(5)    30.    0.00 
   5  -4  14 o   86(7)    78.   180.00
   5  -3   6 o   35(4)    35.    0.00 
   5  -3   7 o   46(5)    49.    0.00 
   5  -3   9 o   4.1(28)   1.6   0.00 
   5  -3  11 o  11.2(33)   0.0  180.00
   5  -3  12 o   5.9(19)   9.5  180.00
   6  -7   8 <   184(14)  90.    0.00 
   6  -7  16 <   24(11)    5.   180.00
   6  -6   7 o    6(4)     4.    0.00 
   6  -6   8 o    5(4)     9.    0.00 
   6  -6  10 o   18(8)    10.   180.00
   6  -6  13 <   11(4)     2.   180.00
   6  -6  16 <    4(7)     0.   180.00
   6  -5   8 o    4(5)     4.    0.00 
   6  -5  10 o   14(4)     6.   180.00
   6  -5  12 o    8(4)     3.   180.00
   6  -5  13 o   14(6)     7.   180.00
   6  -5  14 o   40(8)    32.    0.00 
   6  -4   7 o   16(5)     5.    0.00 
   6  -4  10 o   10(4)     3.   180.00
   6  -4  12 o   3.2(34)   8.7   0.00 
   6  -4  13 o   20(5)    10.   180.00
   6  -4  16 o    8(4)     6.   180.00
   6  -3   7 o  11.0(32)  21.9  180.00
   7  -9  15 <   37(13)    1.    0.00 
   7  -9  17 <   14(13)    0.   180.00
   7  -8  10 <   15(8)     0.    0.00 
   7  -8  15 <   16(15)    5.   180.00
   7  -8  17 <   20(8)     2.   180.00
   7  -8  20 <   32(12)    0.   180.00
   7  -7   8 <    7(9)     1.    0.00 
   7  -7  12 <   21(10)    0.    0.00 
   7  -7  13 <   29(11)    1.   180.00
   7  -7  15 <   18(8)    19.   180.00
   7  -7  16 <   16(11)    2.   180.00
   7  -7  17 <    6(10)    1.    0.00 
   7  -7  19 <   11(14)    2.    0.00 
   7  -6   8 <   10(8)     9.   180.00
   7  -6  13 <   14(9)     0.   180.00
   7  -6  14 <   24(10)    0.   180.00
   7  -6  15 <    8(10)    0.    0.00 
   7  -6  16 <    6(7)     0.    0.00 
   7  -6  18 <   14(10)    1.    0.00 
   7  -5   8 o    4(5)     1.   180.00
   7  -5  16 <   22(7)     0.   180.00
   7  -5  17 <   12(10)    0.    0.00 
   7  -5  18 <   11(7)     1.    0.00 
   7  -4   8 o   83(8)    74.    0.00 
   7  -4   9 o   34(8)    32.   180.00
   7  -4  12 o   16(5)     5.   180.00
   7  -4  16 <   62(11)    6.   180.00
   8  -9  10 <   30(13)   14.   180.00
   8  -9  12 <   14(14)    0.   180.00
   8  -9  13 <   18(11)    1.   180.00
   8  -8  10 <   28(9)     0.    0.00 
   8  -7  12 <   18(12)    8.   180.00
   8  -7  13 <   27(13)    9.   180.00
   8  -7  15 <   10(8)     0.    0.00 
   8  -7  18 <    5(9)     0.    0.00 
   8  -7  19 <   27(13)    0.    0.00 
   8  -7  21 <   14(14)    0.    0.00 
   8  -6  13 <   18(8)     1.    0.00 
   8  -6  15 <   13(13)    1.    0.00 
   8  -6  20 <   12(12)    3.    0.00 
   8  -5  10 <    2(7)    20.   180.00
   8  -5  11 <   31(12)   18.   180.00
   8  -5  12 <    9(9)     2.    0.00 
   8  -5  15 <    4(11)    9.   180.00
   8  -5  20 <   17(9)     2.   180.00
   8  -4  10 <   33(9)    16.    0.00 
   8  -4  11 <   75(16)   33.   180.00
   8  -4  12 <   23(7)    14.    0.00 
   9  -7  12 <    2(10)    1.   180.00
   9  -7  12 <   17(14)    1.   180.00
   9  -6  13 <   22(13)    5.   180.00
   9  -6  15 <   47(15)   13.   180.00
   9  -6  18 <   38(19)   10.    0.00 
   9  -5  10 <   24(13)    0.   180.00
   9  -5  12 <    8(8)     0.   180.00
   9  -5  13 <   18(16)    1.   180.00
   9  -5  14 <   30(16)    1.    0.00 
   9  -5  16 <   21(10)   20.    0.00 
  10  -7  12 <    7(16)    2.    0.00 
  10  -6  11 <    9(14)    0.    0.00 
  10  -6  12 <   15(10)    5.   180.00
  10  -5  14 <   45(15)    9.    0.00 
_reflns_number_total                   65
_reflns_limit_h_min                    1
_reflns_limit_h_max                    10
_reflns_limit_k_min                    -9
_reflns_limit_k_max                    -1
_reflns_limit_l_min                    2
_reflns_limit_l_max                    21
_reflns_d_resolution_high              0.504
_reflns_d_resolution_low               4.153
data_UNOFA_s_47


loop_
      _refln_index_h
      _refln_index_k
      _refln_index_l
      _refln_observed_status
      _refln_F_squared_meas
      _refln_F_squared_calc
      _refln_phase_calc
   1  -1  -3 o  34.9(11)  31.4  180.00
   1  -1  -2 o   7.0(7)    7.9   0.00 
   2  -2  -6 o  22.3(11)  22.1   0.00 
   2  -2  -5 o  17.9(9)   18.6  180.00
   2  -2  -4 o  55.0(16)  54.9   0.00 
   2  -1  -5 o   5.1(5)    5.3  180.00
   2  -1  -4 o  57.9(16)  56.7  180.00
   3  -4  -9 o   4.0(29)   5.7   0.00 
   3  -3  -9 o  19.7(26)  25.0  180.00
   3  -3  -7 o   9.4(11)  11.9  180.00
   3  -3  -6 o  55.1(22)  54.7  180.00
   3  -2  -8 o   1.6(9)    0.1  180.00
   3  -2  -7 o   2.9(9)    2.1  180.00
   3  -2  -6 o  28.8(14)  28.3  180.00
   3  -2  -5 o  11.3(11)   7.8  180.00
   4  -4 -12 o   31(6)    32.    0.00 
   4  -4 -10 o   8.1(29)   9.6   0.00 
   4  -4  -8 o  22.9(28)  30.6  180.00
   4  -4  -7 o  17.3(23)  19.2  180.00
   4  -3 -12 o   66(6)    65.   180.00
   4  -3 -11 o   6.5(26)   9.5   0.00 
   4  -3 -10 o   98(5)    97.   180.00
   4  -3  -8 o   91(4)    98.   180.00
   4  -3  -7 o  14.3(19)  14.1  180.00
   4  -2 -11 o   17(4)    15.    0.00 
   4  -2 -10 o  22.5(26)  23.8  180.00
   4  -2  -9 o   3.9(11)   1.1  180.00
   5  -6 -15 o   10(7)     1.   180.00
   5  -5 -12 o    5(5)     0.   180.00
   5  -5 -11 o    7(4)     4.   180.00
   5  -5 -10 o   9.3(29)   6.7  180.00
   5  -5  -9 o   20(5)     4.   180.00
   5  -4 -14 o    3(4)     3.   180.00
   5  -4 -12 o   22(5)    13.   180.00
   5  -4 -11 o    2(4)     0.    0.00 
   5  -4 -10 o   6.7(26)  13.0   0.00 
   5  -3 -15 o   16(5)    14.   180.00
   5  -3 -14 o   19(5)     9.    0.00 
   5  -3 -13 o   29(5)    26.   180.00
   5  -3 -11 o   39(5)    46.   180.00
   5  -3  -9 o   5.5(32)   5.7  180.00
   5  -2 -14 o    9(4)    12.    0.00 
   5  -2 -12 o   26(4)    32.    0.00 
   5  -2 -11 o   42(5)    38.    0.00 
   5  -2 -10 o  22.3(28)  22.3  180.00
   6  -8 -17 <   16(8)     5.    0.00 
   6  -7 -16 <   19(11)    0.   180.00
   6  -6 -18 <   18(7)    25.   180.00
   6  -6 -16 <   13(6)    12.   180.00
   6  -6 -15 <    4(8)     0.   180.00
   6  -5 -17 o   18(8)     6.   180.00
   6  -5 -16 o   15(7)     7.    0.00 
   6  -5 -14 o    8(5)     3.   180.00
   6  -5 -13 o   19(5)    21.   180.00
   6  -5 -12 o    9(6)     2.    0.00 
   6  -5 -10 o   15(6)     0.    0.00 
   6  -4 -13 o   32(7)    29.    0.00 
   6  -4 -12 o   6.9(33)   4.1   0.00 
   6  -3 -16 o   19(11)   14.    0.00 
   6  -3 -13 o   7.6(32)  13.5   0.00 
   6  -3 -12 o    9(4)     0.    0.00 
   6  -3 -11 o   11(4)    14.   180.00
   7  -8 -19 <   23(10)    1.   180.00
   7  -8 -17 <   44(14)    1.   180.00
   7  -7 -22 <   77(15)    0.    0.00 
   7  -7 -18 <   12(7)     0.    0.00 
   7  -7 -16 <    5(8)     1.   180.00
   7  -7 -15 <   14(7)     8.    0.00 
   7  -6 -20 <   34(17)   11.    0.00 
   7  -6 -19 <   33(10)    1.   180.00
   7  -6 -18 <    9(11)   13.    0.00 
   7  -6 -12 <    8(5)     1.    0.00 
   7  -5 -20 <   11(7)     0.    0.00 
   7  -5 -19 <   17(10)    3.    0.00 
   7  -5 -17 <    3(6)     3.    0.00 
   7  -5 -15 <    2(5)     2.    0.00 
   7  -5 -14 o    5(7)     1.   180.00
   7  -5 -12 o    9(7)     0.    0.00 
   7  -4 -20 <   17(11)   11.    0.00 
   7  -4 -18 <   13(8)    10.    0.00 
   7  -4 -16 o    9(5)     1.   180.00
   7  -4 -15 o   24(7)    26.    0.00 
   7  -4 -14 o   16(6)    20.    0.00 
   7  -4 -13 o    8(4)    10.    0.00 
   7  -3 -20 <   28(8)    15.    0.00 
   7  -3 -19 <   148(14)  167.   0.00 
   7  -3 -18 o   36(8)    25.   180.00
   7  -3 -17 o   13(5)     8.    0.00 
   7  -3 -16 o    9(4)     1.   180.00
   7  -3 -15 o   11(6)    18.   180.00
   7  -3 -13 o   22(6)    17.   180.00
   7  -3 -12 o   23(5)    26.   180.00
   8  -8 -19 <   40(24)    6.    0.00 
   8  -8 -17 <   26(15)   16.   180.00
   8  -8 -16 <   22(13)   32.    0.00 
   8  -8 -15 <   28(9)    26.   180.00
   8  -7 -25 <   29(22)    0.   180.00
   8  -7 -23 <   11(13)    2.   180.00
   8  -7 -18 <   20(14)   33.    0.00 
   8  -7 -14 <   32(15)    0.    0.00 
   8  -7 -13 <   20(11)   11.    0.00 
   8  -6 -22 <    1(11)    0.    0.00 
   8  -6 -20 <   11(12)   16.    0.00 
   8  -6 -19 <    5(11)    9.    0.00 
   8  -6 -15 <   21(10)    2.   180.00
   8  -5 -19 <    7(11)    0.   180.00
   8  -5 -17 <    4(6)     5.   180.00
   8  -5 -15 <   14(9)     8.    0.00 
   8  -5 -14 <    5(5)     0.    0.00 
   8  -4 -19 <   14(7)     2.   180.00
   8  -4 -18 <   19(8)     2.    0.00 
   8  -4 -14 <   11(4)     0.    0.00 
   8  -3 -20 <   50(13)   22.    0.00 
   8  -3 -19 <   55(9)    50.   180.00
   8  -3 -17 <   52(10)   11.    0.00 
   9  -8 -16 <    4(10)    1.   180.00
   9  -7 -21 <   30(16)    3.    0.00 
   9  -7 -20 <   15(10)    1.    0.00 
   9  -7 -19 <   17(11)    1.    0.00 
   9  -7 -18 <   25(13)    0.   180.00
   9  -7 -17 <   26(16)    4.   180.00
   9  -6 -24 <   40(17)    1.    0.00 
   9  -6 -23 <   32(16)    0.    0.00 
   9  -6 -22 <   17(20)    2.    0.00 
   9  -6 -18 <   32(9)    14.   180.00
   9  -5 -26 <   21(17)    1.    0.00 
   9  -5 -25 <   12(12)    0.   180.00
   9  -5 -20 <   13(9)    11.   180.00
   9  -5 -16 <   15(7)    20.    0.00 
   9  -4 -24 <   42(22)    6.   180.00
   9  -4 -19 <   13(10)    0.   180.00
   9  -4 -16 <   24(12)    5.    0.00 
  10  -7 -17 <   10(8)     2.    0.00 
  10  -6 -21 <   31(15)    1.    0.00 
  10  -6 -20 <   25(10)    0.    0.00 
  10  -6 -18 <   28(13)    1.    0.00 
  10  -4 -24 <   31(19)    0.   180.00
  10  -4 -21 <    9(8)     0.   180.00
  10  -4 -17 <   16(9)     9.   180.00
_reflns_number_total                   69
_reflns_limit_h_min                    1
_reflns_limit_h_max                    10
_reflns_limit_k_min                    -8
_reflns_limit_k_max                    -1
_reflns_limit_l_min                    -26
_reflns_limit_l_max                    -2
_reflns_d_resolution_high              0.506
_reflns_d_resolution_low               4.378
data_UNOFA_s_48


loop_
      _refln_index_h
      _refln_index_k
      _refln_index_l
      _refln_observed_status
      _refln_F_squared_meas
      _refln_F_squared_calc
      _refln_phase_calc
   2  -1  -2 o   3.8(7)    3.5   0.00 
   3  -2  -4 o  15.8(10)  13.0  180.00
   3  -2  -3 o  11.8(13)   9.9   0.00 
   3  -2  -2 o   1.9(7)    2.3  180.00
   3  -2  -1 o  29.0(20)  30.8  180.00
   3  -1  -3 o  53.8(20)  51.9   0.00 
   3  -1  -1 o  11.6(13)  13.3   0.00 
   4  -3  -5 o   181(4)   177.   0.00 
   4  -3  -4 o   149(4)   152.   0.00 
   4  -3  -3 o   2.4(8)    0.0  180.00
   4  -3  -2 o  81.6(29)  85.8   0.00 
   4  -3  -1 o  13.3(17)  12.6  180.00
   4  -2  -5 o  10.7(15)  10.4   0.00 
   4  -2  -4 o   270(5)   274.   0.00 
   4  -2  -3 o  66.3(27)  60.4  180.00
   4  -2  -2 o  12.5(17)  13.0  180.00
   4  -2  -1 o   7.8(11)   9.4   0.00 
   5  -4  -6 o   31(4)    30.    0.00 
   5  -4  -4 o   38(4)    42.    0.00 
   5  -4  -3 o   6.9(30)   5.1   0.00 
   5  -4  -2 o   3.6(16)   1.1   0.00 
   5  -3  -6 o  23.3(35)  22.7   0.00 
   5  -3  -5 o   77(4)    71.    0.00 
   5  -3  -4 o   8.4(20)   9.1  180.00
   5  -3  -3 o  10.7(24)   7.8   0.00 
   5  -3  -2 o   111(5)   117.  180.00
   5  -3  -1 o   94(4)    91.   180.00
   5  -2  -6 o  93.7(34)  87.5  180.00
   5  -2  -5 o   4.5(20)   3.5   0.00 
   5  -2  -4 o   4.6(16)   6.1  180.00
   5  -2  -3 o  84.0(33)  90.5  180.00
   5  -2  -2 o   131(4)   132.   0.00 
   6  -5  -7 o    3(4)     3.   180.00
   6  -5  -6 o    7(5)    14.    0.00 
   6  -5  -5 o   11(5)     8.    0.00 
   6  -5  -3 o   38(5)    36.   180.00
   6  -4  -7 o   7.8(25)   5.4  180.00
   6  -4  -1 o   3.3(16)   0.2   0.00 
   6  -3  -6 o  15.8(33)  15.8   0.00 
   6  -3  -5 o  25.0(34)  26.9  180.00
   6  -3  -4 o  19.1(34)  18.3  180.00
   6  -3  -3 o  10.1(33)  17.6   0.00 
   6  -3  -2 o   5.5(24)   8.7  180.00
   6  -2  -5 o   6.6(21)   7.1   0.00 
   6  -2  -4 o   0.6(12)   0.7  180.00
   6  -2  -3 o   69(4)    64.    0.00 
   7  -6  -8 o   16(7)     0.   180.00
   7  -5  -7 o    6(5)     4.    0.00 
   7  -5  -6 o   29(6)    20.   180.00
   7  -5  -3 o   10(4)    11.   180.00
   7  -5  -2 o   33(6)    31.    0.00 
   7  -5  -1 o   14(4)    14.   180.00
   7  -4  -9 o   13(7)     9.   180.00
   7  -4  -7 o    8(4)     0.   180.00
   7  -4  -4 o   24(4)    25.    0.00 
   7  -4  -2 o   7.1(23)  14.2   0.00 
   7  -3  -9 o   24(5)    13.    0.00 
   7  -3  -8 o   10(4)     9.    0.00 
   7  -3  -7 o   19(7)    10.    0.00 
   7  -3  -5 o   2.8(22)   3.1   0.00 
   7  -3  -4 o   8.2(30)   0.0   0.00 
   7  -3  -3 o   4.9(28)   0.1   0.00 
   8  -7  -6 <   67(12)   29.    0.00 
   8  -6 -10 <   35(13)    0.   180.00
   8  -6  -6 <    3(6)     1.    0.00 
   8  -5  -3 o   10(6)     0.   180.00
   8  -5  -1 o   18(5)     5.   180.00
   8  -4 -11 o   24(7)     8.   180.00
   8  -4 -10 o   11(5)     2.   180.00
   8  -4  -9 o   14(7)     5.    0.00 
   8  -4  -5 o   14(5)     7.    0.00 
   8  -4  -4 o    9(6)     7.    0.00 
   8  -4  -2 o   14(5)    13.    0.00 
   8  -3 -10 o   26(7)    40.    0.00 
   8  -3  -8 o   19(7)    16.    0.00 
   8  -3  -4 o   16(4)     5.   180.00
   9  -7 -11 <   23(10)   11.   180.00
   9  -7  -9 <   52(13)   33.    0.00 
   9  -7  -7 <   13(12)   18.    0.00 
   9  -7  -4 <   15(7)    15.    0.00 
   9  -6 -10 <   46(15)   29.    0.00 
   9  -6  -9 <   26(14)   15.    0.00 
   9  -6  -8 <   21(11)    4.    0.00 
   9  -6  -7 <   22(10)    7.   180.00
   9  -6  -4 <   17(9)     5.   180.00
   9  -6  -1 <   34(10)    6.   180.00
   9  -5 -10 <    7(7)     2.   180.00
   9  -5  -7 <   10(6)     1.    0.00 
   9  -5  -5 <   16(6)     4.   180.00
   9  -4  -6 <   17(6)    15.    0.00 
   9  -4  -4 <    5(7)     4.    0.00 
   9  -4  -3 <   10(7)     6.    0.00 
   9  -3  -8 <    7(8)     0.   180.00
   9  -3  -6 o    1(5)     9.    0.00 
   9  -3  -5 o    8(7)     2.   180.00
   9  -3  -4 o   14(6)     0.   180.00
  10  -8 -12 <    8(11)    0.    0.00 
  10  -8 -11 <   15(16)    2.    0.00 
  10  -8  -8 <    8(11)    0.   180.00
  10  -8  -6 <   14(14)    0.    0.00 
  10  -8  -3 <   49(17)    1.    0.00 
  10  -7  -9 <   17(15)    1.    0.00 
  10  -7  -4 <   13(14)    0.   180.00
  10  -7  -2 <   29(9)    16.   180.00
  10  -7  -1 <   24(13)    5.   180.00
  10  -6  -9 <   28(13)   11.   180.00
  10  -5 -13 <   34(16)    4.   180.00
  10  -5 -12 <   19(12)    1.    0.00 
  10  -5  -7 <   42(13)   37.    0.00 
  10  -5  -6 <   46(12)   26.   180.00
  10  -5  -3 <   15(12)    3.   180.00
  10  -4  -9 <   27(13)   40.    0.00 
  10  -4  -8 <   26(9)    22.   180.00
  10  -4  -7 <    7(10)    4.    0.00 
  10  -4  -5 <   20(7)    15.   180.00
  11  -8  -6 <   15(11)    0.    0.00 
  11  -8  -4 <   12(15)    1.    0.00 
  11  -7  -2 <   11(10)    3.   180.00
  11  -6 -15 <   38(16)    1.   180.00
  11  -5  -6 <   25(17)   14.   180.00
  11  -5  -5 <    2(9)     0.    0.00 
  11  -5  -3 <    8(8)     1.   180.00
  11  -4 -11 <    3(11)    0.   180.00
  11  -4  -9 <   77(21)   25.   180.00
  11  -4  -8 <   13(14)    5.   180.00
  11  -4  -6 <   53(13)   16.   180.00
  11  -4  -5 <   17(9)    13.    0.00 
_reflns_number_total                   76
_reflns_limit_h_min                    2
_reflns_limit_h_max                    11
_reflns_limit_k_min                    -8
_reflns_limit_k_max                    -1
_reflns_limit_l_min                    -15
_reflns_limit_l_max                    -1
_reflns_d_resolution_high              0.493
_reflns_d_resolution_low               2.934
data_UNOFA_s_49


loop_
      _refln_index_h
      _refln_index_k
      _refln_index_l
      _refln_observed_status
      _refln_F_squared_meas
      _refln_F_squared_calc
      _refln_phase_calc
  -6 -12   4 <   12(10)     1.    0.00 
  -5 -12  -1 <   17(11)     3.    0.00 
  -5 -12   1 <   23(9)      0.   180.00
  -5 -12   6 <   12(16)     7.    0.00 
  -5 -11  -1 <   19(10)     1.   180.00
  -5 -11   2 <    4(7)      9.    0.00 
  -5 -11   4 <   38(18)     1.    0.00 
  -5 -10   2 <    7(9)     12.    0.00 
  -4 -13   4 <   51(24)     0.    0.00 
  -4 -12  -2 <   38(18)     1.   180.00
  -4 -12   2 <   17(10)     1.    0.00 
  -4 -12   6 <   19(11)     0.   180.00
  -4 -11  -1 <    9(7)      3.    0.00 
  -4 -11   3 <   18(8)     12.   180.00
  -4 -11   5 <   15(13)    31.   180.00
  -4 -11   6 <   12(10)     0.   180.00
  -4 -10  -2 <    6(5)      0.    0.00 
  -4 -10  -1 <   44(15)    20.    0.00 
  -4 -10   0 <   11(6)     12.   180.00
  -4 -10   2 <    8(9)      7.   180.00
  -4 -10   5 <   11(7)     11.    0.00 
  -4 -10   6 <   10(12)     0.    0.00 
  -4  -9  -1 <    7(5)     16.    0.00 
  -4  -9   0 <   18(9)      1.   180.00
  -4  -9   3 <    7(8)      1.   180.00
  -4  -9   5 <   26(9)     22.   180.00
  -4  -9   6 <   145(17)   65.    0.00 
  -4  -8   2 o    7(4)      0.   180.00
  -4  -8   3 o   18(5)     21.   180.00
  -4  -8   4 o    8(5)     10.    0.00 
  -3 -13  -2 <   30(16)     1.    0.00 
  -3 -13   7 <   48(23)     0.    0.00 
  -3 -12  -2 <   28(11)     0.   180.00
  -3 -12  -1 <   17(9)      0.   180.00
  -3 -12   2 <   13(9)      0.   180.00
  -3 -12   5 <   37(19)     0.    0.00 
  -3 -12   7 <   46(23)     0.   180.00
  -3 -11  -2 <    9(7)      0.    0.00 
  -3 -11   0 <   20(10)     1.    0.00 
  -3 -11   2 <   28(10)    18.   180.00
  -3 -11   5 <   20(12)     0.   180.00
  -3 -11   6 <   19(9)      0.   180.00
  -3 -10  -2 <   18(7)      5.    0.00 
  -3 -10   1 <    6(8)      1.   180.00
  -3 -10   4 <    5(10)     2.    0.00 
  -3  -9   0 o    6(4)      0.   180.00
  -3  -9   4 o   32(8)     35.   180.00
  -3  -9   5 o   18(8)     24.    0.00 
  -3  -8  -1 o   18(5)     16.    0.00 
  -3  -8   3 o   20(7)      3.    0.00 
  -3  -8   4 o    8(6)      2.   180.00
  -3  -8   5 o   26(6)     43.   180.00
  -3  -7   1 o   11(4)     11.   180.00
  -3  -6   1 o   1.1(16)    1.8  180.00
  -3  -6   2 o  16.0(28)   19.2  180.00
  -3  -6   3 o   13(5)     16.   180.00
  -2 -13  -3 <   13(9)      2.    0.00 
  -2 -13   0 <   27(16)     1.    0.00 
  -2 -13   3 <   17(19)     0.   180.00
  -2 -13   7 <   72(23)     0.    0.00 
  -2 -12   0 <   28(11)     5.    0.00 
  -2 -12   6 <   23(17)     1.    0.00 
  -2 -11  -2 <   27(7)     17.    0.00 
  -2 -11  -1 <    5(10)    10.    0.00 
  -2 -11   3 <   34(16)     3.   180.00
  -2 -11   4 <   38(15)     0.    0.00 
  -2 -11   5 <   12(8)      0.   180.00
  -2 -11   6 <   22(14)    13.   180.00
  -2 -10   1 <   14(11)     3.   180.00
  -2  -9  -1 o   11(6)     21.    0.00 
  -2  -9   0 o   10(5)     12.   180.00
  -2  -9   1 o   12(7)      9.    0.00 
  -2  -9   2 o    4(5)      0.    0.00 
  -2  -8  -1 o    6(4)      6.    0.00 
  -2  -8   0 o   11(5)      3.   180.00
  -2  -8   1 o   18(5)     27.   180.00
  -2  -8   3 o   35(7)     32.   180.00
  -2  -7   2 o   4.9(26)    0.2  180.00
  -2  -7   3 o   5.8(29)    2.1  180.00
  -2  -6  -1 o   5.9(18)   13.1   0.00 
  -2  -6   0 o  22.5(30)   23.9  180.00
  -2  -6   2 o   29(4)     28.   180.00
  -2  -6   3 o   15(4)     17.    0.00 
  -2  -5  -1 o  11.4(20)    9.9   0.00 
  -2  -5   0 o  32.1(21)   33.1  180.00
  -2  -5   1 o  12.8(17)   11.3  180.00
  -2  -5   2 o   5.1(19)    7.5  180.00
  -2  -5   3 o   52(4)     57.    0.00 
  -2  -4   1 o  22.6(17)   20.0  180.00
  -1 -13  -3 <   24(11)     1.    0.00 
  -1 -13   2 <   10(10)     0.   180.00
  -1 -12   2 <   16(16)     0.    0.00 
  -1 -12   3 <   34(13)     1.    0.00 
  -1 -12   6 <   114(28)    9.   180.00
  -1 -11  -3 <   34(9)     10.    0.00 
  -1 -11  -1 <   17(9)      3.   180.00
  -1 -11   0 <    5(10)    25.   180.00
  -1 -11   1 <    9(12)     2.   180.00
  -1 -11   2 <   25(10)     7.   180.00
  -1 -11   4 <   30(11)    20.   180.00
  -1 -10   0 <   13(9)      3.    0.00 
  -1 -10   1 <   24(12)     2.   180.00
  -1 -10   5 <   20(11)     0.   180.00
  -1  -9  -2 o    7(7)     28.    0.00 
  -1  -9   2 o   43(13)    52.   180.00
  -1  -8  -2 o   12(4)      1.   180.00
  -1  -8  -1 o   16(5)     12.    0.00 
  -1  -8   0 o   22(6)     21.   180.00
  -1  -8   3 o   10(4)     16.   180.00
  -1  -8   4 o    9(6)      9.    0.00 
  -1  -7   0 o   4.6(18)    0.3  180.00
  -1  -7   1 o   6.3(32)    9.6  180.00
  -1  -6  -1 o   6.2(12)    7.4  180.00
  -1  -6   0 o   53(4)     61.   180.00
  -1  -6   1 o   40(4)     41.   180.00
  -1  -6   2 o   8.3(18)   10.4  180.00
  -1  -6   3 o  10.6(28)   15.6  180.00
  -1  -5  -1 o  32.0(20)   35.3  180.00
  -1  -5   0 o   9.6(18)   11.5  180.00
  -1  -5   1 o  10.9(20)   11.3   0.00 
  -1  -5   2 o   91(4)     98.    0.00 
  -1  -4   0 o  18.0(12)   17.9  180.00
  -1  -4   1 o   1.2(5)     2.3   0.00 
  -1  -4   2 o  54.5(21)   56.5   0.00 
  -1  -3   0 o  13.2(10)   10.9   0.00 
  -1  -3   1 o  30.3(12)   31.0  180.00
  -1  -2   1 o  100.7(17)  92.3   0.00 
   0 -13   4 <   13(16)     0.   180.00
   0 -12   5 <   26(10)     8.   180.00
   0 -11   3 <   24(12)    15.   180.00
   0 -11   4 <   16(14)     2.    0.00 
   0 -10   4 <   35(9)      0.   180.00
   0  -9   2 o   13(4)      0.   180.00
   0  -7   2 o   4.7(34)    3.0   0.00 
   0  -6   1 o   68(4)     57.    0.00 
   0  -6   2 o  28.6(33)   25.2  180.00
   0  -5   1 o   199(5)    207.   0.00 
   0  -4   1 o  67.8(20)   67.5  180.00
   0  -3   1 o   6.9(5)     7.2   0.00 
_reflns_number_total                   65
_reflns_limit_h_min                    -6
_reflns_limit_h_max                    0
_reflns_limit_k_min                    -13
_reflns_limit_k_max                    -2
_reflns_limit_l_min                    -3
_reflns_limit_l_max                    7
_reflns_d_resolution_high              0.494
_reflns_d_resolution_low               2.991
data_UNOFA_s_50


loop_
      _refln_index_h
      _refln_index_k
      _refln_index_l
      _refln_observed_status
      _refln_F_squared_meas
      _refln_F_squared_calc
      _refln_phase_calc
  -5 -12  -6 <   39(13)    2.    0.00 
  -5 -11 -14 <   44(28)    1.   180.00
  -5 -11 -11 <   35(15)    0.   180.00
  -5 -11 -10 <   48(18)    0.    0.00 
  -5 -11  -9 <   28(22)    0.    0.00 
  -5 -11  -8 <   13(18)    0.   180.00
  -5 -11  -7 <   17(12)    1.   180.00
  -4 -12  -9 <   29(25)    2.   180.00
  -4 -11 -14 <    6(18)    1.   180.00
  -4 -11 -12 <   33(24)    0.    0.00 
  -4 -11  -8 <   14(17)    0.   180.00
  -4 -11  -6 <   12(16)    1.   180.00
  -4 -10 -14 <    8(15)    0.    0.00 
  -4 -10  -7 <   29(10)    2.    0.00 
  -4 -10  -6 <    0(10)    4.    0.00 
  -4  -9 -14 <   11(10)    0.   180.00
  -4  -9 -11 <   20(12)    3.    0.00 
  -4  -9  -9 <   26(11)    0.    0.00 
  -4  -9  -7 <   21(12)    8.   180.00
  -4  -9  -6 <   14(8)    11.    0.00 
  -3 -12  -6 <   17(20)    0.    0.00 
  -3 -11 -17 <   33(15)    1.   180.00
  -3 -11 -12 <   29(17)   12.    0.00 
  -3 -11 -10 <   32(17)    1.    0.00 
  -3 -11  -9 <   42(20)    0.    0.00 
  -3 -11  -6 <   33(15)    0.   180.00
  -3 -10 -16 <    8(9)    13.   180.00
  -3 -10 -14 <   22(9)     2.    0.00 
  -3 -10 -12 <   48(15)    5.    0.00 
  -3 -10  -8 <   20(9)     2.   180.00
  -3 -10  -6 <   38(13)    1.   180.00
  -3  -9 -14 <   18(12)   16.    0.00 
  -3  -9  -7 <   32(8)    26.    0.00 
  -3  -9  -4 <   14(9)     0.    0.00 
  -3  -8 -13 <   18(6)    32.    0.00 
  -3  -8 -11 o   12(6)    17.   180.00
  -3  -8  -9 o   28(8)    28.   180.00
  -3  -8  -8 o   19(7)    15.   180.00
  -3  -8  -6 o   57(13)   43.   180.00
  -3  -8  -5 o   18(5)    18.   180.00
  -3  -8  -4 o   12(7)     0.    0.00 
  -3  -7 -11 o   41(5)    45.   180.00
  -3  -7  -9 o    4(4)     0.    0.00 
  -3  -7  -8 o   58(7)    36.   180.00
  -3  -7  -5 o   59(8)    52.    0.00 
  -3  -7  -4 o   25(5)     9.    0.00 
  -2 -13  -6 <   73(31)    3.   180.00
  -2 -12 -10 <   42(22)    2.   180.00
  -2 -11 -14 <   53(19)   11.    0.00 
  -2 -11 -11 <   48(14)    8.   180.00
  -2 -11 -10 <   12(10)    1.   180.00
  -2 -11  -9 <   40(18)   19.   180.00
  -2 -10 -16 <   18(12)    6.    0.00 
  -2 -10 -15 <   29(11)    9.    0.00 
  -2 -10 -13 <   23(8)     5.   180.00
  -2 -10 -12 <    2(8)    17.   180.00
  -2 -10  -9 <   12(9)    13.    0.00 
  -2 -10  -7 <   32(11)   12.   180.00
  -2 -10  -5 <   18(14)    4.   180.00
  -2  -9 -12 <    3(9)     3.   180.00
  -2  -9 -11 <   12(6)     2.    0.00 
  -2  -9  -9 <   37(11)   30.   180.00
  -2  -9  -8 <   74(17)   48.    0.00 
  -2  -9  -7 o   50(16)   52.   180.00
  -2  -9  -6 o   26(11)    1.    0.00 
  -2  -8 -12 o   26(7)    10.   180.00
  -2  -8 -11 o   12(6)     5.   180.00
  -2  -8 -10 o    9(6)     6.    0.00 
  -2  -8  -9 o   15(5)    12.   180.00
  -2  -8  -8 o   36(8)    39.   180.00
  -2  -8  -6 o    9(5)     0.   180.00
  -2  -8  -5 o   34(7)    34.    0.00 
  -2  -8  -4 o   15(5)    19.    0.00 
  -2  -7 -11 o    8(5)    10.   180.00
  -2  -7 -10 o  10.1(30)   7.5   0.00 
  -2  -7  -8 o   4.1(31)   6.2   0.00 
  -2  -7  -7 o   9.8(32)   9.3   0.00 
  -2  -6  -9 o  17.7(34)  15.3  180.00
  -2  -6  -7 o   15(4)    19.    0.00 
  -2  -6  -6 o  14.8(30)   9.1  180.00
  -2  -6  -5 o   2.5(18)   0.2   0.00 
  -2  -6  -4 o  10.0(21)   9.7   0.00 
  -2  -5  -8 o  34.6(30)  25.2   0.00 
  -2  -5  -7 o  19.3(32)  19.7   0.00 
  -2  -5  -5 o  28.2(28)  27.6   0.00 
  -2  -5  -4 o  14.5(29)   8.0   0.00 
  -2  -5  -3 o   8.5(20)   8.6   0.00 
  -1 -13  -8 <   64(19)    1.   180.00
  -1 -12  -9 <   22(16)    0.    0.00 
  -1 -12  -8 <   29(20)    2.   180.00
  -1 -11 -13 <   45(20)    9.   180.00
  -1 -11 -12 <   42(11)   24.   180.00
  -1 -11 -10 <   34(15)    0.   180.00
  -1 -11  -8 <    9(9)     2.   180.00
  -1 -11  -6 <   10(15)    1.    0.00 
  -1 -10  -9 <   25(9)     7.    0.00 
  -1 -10  -7 <   48(15)   38.    0.00 
  -1  -9 -12 <   18(10)    1.   180.00
  -1  -9 -11 <   25(7)    32.    0.00 
  -1  -9 -10 <   42(9)    30.   180.00
  -1  -9  -8 o   19(11)    4.    0.00 
  -1  -9  -7 o   50(11)   37.   180.00
  -1  -9  -6 o   71(13)   41.    0.00 
  -1  -9  -5 o   11(6)     2.   180.00
  -1  -8  -9 o    7(5)    17.   180.00
  -1  -8  -6 o    3(5)     1.    0.00 
  -1  -7 -11 o   12(5)     9.   180.00
  -1  -7 -10 o   11(4)     5.   180.00
  -1  -7  -6 o   17(4)    17.    0.00 
  -1  -7  -5 o   25(5)    28.   180.00
  -1  -7  -4 o    6(4)     0.   180.00
  -1  -6  -9 o   6.9(16)   5.7  180.00
  -1  -6  -8 o   10(4)    10.    0.00 
  -1  -6  -7 o   1.4(16)   1.3  180.00
  -1  -6  -6 o   32(4)    29.    0.00 
  -1  -6  -5 o   59(4)    54.    0.00 
  -1  -6  -4 o   2.4(21)   1.4   0.00 
  -1  -6  -3 o   54(4)    52.    0.00 
  -1  -5  -8 o   63(4)    63.    0.00 
  -1  -5  -7 o  14.3(20)  13.1   0.00 
  -1  -5  -6 o  24.5(26)  19.8  180.00
  -1  -5  -5 o  59.0(33)  53.3   0.00 
  -1  -5  -4 o   3.9(13)   3.0   0.00 
  -1  -5  -3 o   71(4)    67.   180.00
  -1  -4  -6 o   4.4(12)   3.2  180.00
  -1  -4  -5 o   3.3(11)   2.2   0.00 
  -1  -4  -4 o   1.7(10)   2.0  180.00
  -1  -4  -3 o  23.7(19)  18.5  180.00
  -1  -4  -2 o  79.8(27)  74.4  180.00
  -1  -3  -4 o   108(4)   134.  180.00
  -1  -3  -3 o   4.6(11)   2.4  180.00
  -1  -3  -2 o   5.4(12)   3.3  180.00
_reflns_number_total                   67
_reflns_limit_h_min                    -5
_reflns_limit_h_max                    -1
_reflns_limit_k_min                    -13
_reflns_limit_k_max                    -3
_reflns_limit_l_min                    -17
_reflns_limit_l_max                    -2
_reflns_d_resolution_high              0.504
_reflns_d_resolution_low               2.065
data_UNOFA_s_51


loop_
      _refln_index_h
      _refln_index_k
      _refln_index_l
      _refln_observed_status
      _refln_F_squared_meas
      _refln_F_squared_calc
      _refln_phase_calc
   1 -11  17 <    7(9)      3.    180.00
   1 -10  13 <   17(8)      8.    180.00
   1 -10  15 <    9(11)    11.    180.00
   1 -10  15 <   21(10)    11.    180.00
   1  -9   4 o    9(4)     15.     0.00 
   1  -9   6 o   62(11)    41.     0.00 
   1  -9   7 o   37(12)    37.     0.00 
   1  -9   8 o    2(6)      4.     0.00 
   1  -9  10 <   39(11)    30.    180.00
   1  -9  11 <   29(13)    32.    180.00
   1  -9  13 <   14(6)      1.     0.00 
   1  -8   4 o    7(6)      1.    180.00
   1  -8   5 o    7(4)      6.     0.00 
   1  -8   9 o   15(6)     17.    180.00
   1  -8  12 o    6(5)      1.    180.00
   1  -8  13 o    7(5)      1.     0.00 
   1  -7   3 o   12(4)     16.    180.00
   1  -7   5 o   23(5)     28.     0.00 
   1  -7   6 o   13(4)     17.     0.00 
   1  -7  10 o   11(4)      5.    180.00
   1  -7  11 o    9(5)      9.     0.00 
   1  -6   2 o  16.1(24)    9.4    0.00 
   1  -6   3 o   55(5)     52.     0.00 
   1  -6   4 o   5.9(19)    1.4   180.00
   1  -6   5 o   48(4)     54.     0.00 
   1  -6   6 o   39(5)     29.    180.00
   1  -6   7 o   5.2(21)    1.3   180.00
   1  -6   8 o   8.1(32)   10.1   180.00
   1  -6   9 o   7.9(24)    5.7   180.00
   1  -6  10 o   14(4)      9.    180.00
   1  -5   2 o   150(4)    156.   180.00
   1  -5   3 o  63.5(34)   66.8    0.00 
   1  -5   4 o   4.8(15)    3.0    0.00 
   1  -5   5 o  53.9(34)   53.3   180.00
   1  -5   6 o  20.3(30)   19.8   180.00
   1  -5   7 o  12.9(23)   13.1   180.00
   1  -5   8 o   65(4)     63.     0.00 
   1  -4   1 o  11.3(13)    6.8    0.00 
   1  -4   2 o  71.0(24)   74.4    0.00 
   1  -4   3 o  17.8(16)   18.5   180.00
   1  -4   5 o   6.8(15)    2.2    0.00 
   1  -4   6 o   2.6(12)    3.2    0.00 
   1  -3   1 o  15.4(11)   16.0    0.00 
   1  -3   2 o   2.3(5)     3.3   180.00
   1  -3   3 o   2.1(5)     2.4    0.00 
   1  -3   4 o  138.3(27)  134.3  180.00
   1  -3   5 o  85.9(23)   83.6   180.00
   2 -13   5 <   123(22)    0.     0.00 
   2 -13   7 <   21(13)     0.    180.00
   2 -13   8 <   20(13)     9.     0.00 
   2 -12   4 <   20(10)    11.    180.00
   2 -12   6 <   36(18)     0.     0.00 
   2 -12   8 <   18(19)     2.     0.00 
   2 -12  14 <   14(19)     1.     0.00 
   2 -12  15 <   33(20)     0.    180.00
   2 -12  16 <   18(17)     0.     0.00 
   2 -11   9 <   12(14)    19.    180.00
   2 -10   3 <   61(14)    19.    180.00
   2 -10   4 <   17(13)     7.     0.00 
   2 -10   5 <    5(8)      4.     0.00 
   2 -10   9 <   20(9)     13.    180.00
   2 -10  10 <   19(9)     15.    180.00
   2 -10  11 <   42(14)     3.     0.00 
   2 -10  12 <   40(11)    17.    180.00
   2 -10  16 <   22(16)     6.     0.00 
   2 -10  17 <   31(14)     4.     0.00 
   2  -9   3 o   15(6)     18.     0.00 
   2  -9   4 o   16(6)     12.     0.00 
   2  -9   6 o   17(9)      1.    180.00
   2  -9   7 o   73(19)    52.    180.00
   2  -9   8 <   56(13)    48.    180.00
   2  -9   9 <   30(8)     30.    180.00
   2  -9  11 <   22(10)     2.     0.00 
   2  -9  13 <   36(15)     3.     0.00 
   2  -8   5 o   48(11)    34.    180.00
   2  -8   8 o   50(12)    39.    180.00
   2  -8   9 o    9(8)     12.     0.00 
   2  -7   2 o   16(5)     10.     0.00 
   2  -7   3 o    5(4)      7.    180.00
   2  -7   7 o   16(5)      9.     0.00 
   2  -7   8 o   11(8)      6.    180.00
   2  -7  12 o    4(5)      0.     0.00 
   2  -6   1 o   14(4)     13.    180.00
   2  -6   2 o   46(5)     50.     0.00 
   2  -6   5 o    6(4)      0.    180.00
   2  -6   6 o   8.0(34)    9.1   180.00
   2  -6   7 o   22(5)     19.    180.00
   2  -6   9 o   17(5)     15.     0.00 
   2  -6  10 o   27(6)     29.    180.00
   2  -5   3 o   8.5(21)    8.6    0.00 
   2  -5   4 o   5.7(19)    8.0   180.00
   2  -5   5 o   23(4)     28.     0.00 
   2  -5   7 o   17(5)     20.     0.00 
   2  -5   8 o   24(7)     25.    180.00
   3 -13   6 <   20(14)     1.    180.00
   3 -11   4 <   46(17)     8.    180.00
   3 -11   5 <    8(16)     2.     0.00 
   3 -11   7 <   21(11)     3.    180.00
   3 -11  11 <   47(19)     1.    180.00
   3 -10   2 <   44(13)     5.    180.00
   3 -10   5 <    5(8)      1.     0.00 
   3 -10   7 <   24(10)     1.    180.00
   3 -10   8 <   32(18)     2.     0.00 
   3 -10  11 <   13(11)     0.    180.00
   3 -10  15 <   30(16)    13.     0.00 
   3 -10  16 <   18(12)    13.     0.00 
   3 -10  16 <    7(12)    13.     0.00 
   3  -9   2 o   23(13)     0.     0.00 
   3  -9   6 <   37(11)    17.    180.00
   3  -9   7 <   24(8)     26.    180.00
   3  -9   8 <   18(8)      4.     0.00 
   3  -9  12 <    3(8)      2.     0.00 
   3  -9  15 <   37(16)     2.     0.00 
   3  -9  17 <   36(19)     9.    180.00
   3  -8   2 o   102(17)   40.    180.00
   3  -8   3 o   28(8)      8.     0.00 
   3  -8   5 o   28(9)     18.    180.00
   3  -8   6 o   42(17)    43.     0.00 
   3  -8   8 o   28(10)    15.     0.00 
   3  -8   9 o   31(17)    28.    180.00
   3  -8  10 o   20(9)      0.    180.00
   3  -8  13 <   40(12)    32.     0.00 
   3  -8  14 <   15(8)     17.    180.00
   3  -8  15 <   17(9)     28.     0.00 
   3  -7   8 o   89(11)    36.    180.00
   3  -7   9 o   12(9)      0.    180.00
   3  -7  10 o   40(11)     0.     0.00 
   3  -7  11 o   132(14)   45.     0.00 
   4 -12   6 <   58(22)     2.    180.00
   4 -12  11 <   76(29)     3.     0.00 
   4 -11   8 <   31(20)     0.     0.00 
   4 -11  11 <   38(20)     0.    180.00
   4 -11  16 <    8(13)     0.     0.00 
   4 -11  17 <   52(28)     1.    180.00
   4 -10   4 <   103(20)   11.     0.00 
   4 -10   5 <   82(21)     3.     0.00 
   4 -10  16 <   29(18)     1.    180.00
   4 -10  18 <   25(14)     3.    180.00
   5 -12  10 <   30(32)     0.     0.00 
_reflns_number_total                   76
_reflns_limit_h_min                    1
_reflns_limit_h_max                    5
_reflns_limit_k_min                    -13
_reflns_limit_k_max                    -3
_reflns_limit_l_min                    1
_reflns_limit_l_max                    18
_reflns_d_resolution_high              0.495
_reflns_d_resolution_low               2.108
data_UNOFA_s_52


loop_
      _refln_index_h
      _refln_index_k
      _refln_index_l
      _refln_observed_status
      _refln_F_squared_meas
      _refln_F_squared_calc
      _refln_phase_calc
  -4 -12  12 <   14(11)    0.   180.00
  -4 -12  13 <   26(21)    4.    0.00 
  -3 -12   8 <   14(16)    6.   180.00
  -3 -12  12 <   58(26)   17.    0.00 
  -3 -12  13 <   23(22)    7.    0.00 
  -3 -11   8 <   22(10)    5.    0.00 
  -3 -11  10 <   129(26)  54.    0.00 
  -3 -11  11 <    1(9)     7.    0.00 
  -3 -11  14 <   46(12)   15.   180.00
  -3 -11  16 <   23(18)    1.   180.00
  -3 -11  17 <   21(17)    1.   180.00
  -3 -10  13 <    9(9)     2.    0.00 
  -3 -10  16 <   47(21)    2.    0.00 
  -3  -9   8 <   51(9)    36.    0.00 
  -3  -9   9 <   21(8)    11.   180.00
  -3  -9  10 <    4(6)     7.    0.00 
  -3  -9  13 <   15(9)     0.   180.00
  -2 -13  10 <   41(14)    0.    0.00 
  -2 -12   6 <   30(19)    1.    0.00 
  -2 -12   7 <   27(17)    8.   180.00
  -2 -12  10 <   18(12)    3.   180.00
  -2 -12  15 <   52(26)    0.    0.00 
  -2 -12  16 <   29(19)    0.   180.00
  -2 -11   9 <   44(13)   25.    0.00 
  -2 -11  11 <   34(18)    6.   180.00
  -2 -11  13 <   14(12)   25.   180.00
  -2 -11  14 <   46(27)    1.    0.00 
  -2 -10   4 <   33(14)    2.    0.00 
  -2 -10  11 <   27(13)    0.    0.00 
  -2 -10  12 <   36(13)    2.    0.00 
  -2 -10  13 <   30(16)    6.    0.00 
  -2  -9   5 o   16(5)     0.   180.00
  -2  -9   6 o    7(7)     3.   180.00
  -2  -9   7 o   24(8)    16.    0.00 
  -2  -9  10 <   15(7)     8.    0.00 
  -2  -9  13 <   23(10)   21.   180.00
  -2  -9  14 <   102(19)   0.   180.00
  -2  -9  15 <   81(15)   35.   180.00
  -2  -8   6 o    6(5)     1.    0.00 
  -2  -8   7 o   13(5)     4.   180.00
  -2  -8  11 o   23(9)     0.   180.00
  -2  -8  13 o   10(6)     5.   180.00
  -2  -7   3 o    5(4)     2.   180.00
  -2  -7   5 o   7.3(24)   9.5   0.00 
  -2  -7   6 o   10(4)     2.    0.00 
  -2  -7  10 o    8(4)     5.    0.00 
  -2  -7  11 o   2.2(34)   0.5   0.00 
  -2  -6   7 o   50(5)    46.   180.00
  -2  -6   8 o   124(6)   110.   0.00 
  -1 -13   5 <   13(13)    0.    0.00 
  -1 -12   5 <   37(11)    8.   180.00
  -1 -12   7 <   41(17)   39.   180.00
  -1 -12  13 <   28(17)    3.    0.00 
  -1 -12  15 <   20(21)    1.    0.00 
  -1 -11   5 <   69(19)   22.   180.00
  -1 -11   6 <   31(10)   16.    0.00 
  -1 -11   9 <   35(11)   27.    0.00 
  -1 -11  10 <   34(16)   29.   180.00
  -1 -11  18 <   51(20)   46.    0.00 
  -1 -10   7 <   10(11)    0.   180.00
  -1 -10  12 <   13(13)    0.    0.00 
  -1 -10  15 <   14(15)    7.   180.00
  -1  -9   5 o   15(9)     1.    0.00 
  -1  -9   8 o   20(12)    0.    0.00 
  -1  -9   9 o   14(6)     0.   180.00
  -1  -9  10 <   11(6)     2.    0.00 
  -1  -9  12 <   57(14)   42.   180.00
  -1  -9  13 <   37(14)   23.   180.00
  -1  -8   3 o   18(6)    16.   180.00
  -1  -8   9 o   12(7)    11.   180.00
  -1  -8  11 o   13(7)     1.   180.00
  -1  -8  12 o    7(6)     6.   180.00
  -1  -7   5 o   9.1(34)   6.2  180.00
  -1  -7   6 o   22(6)    15.   180.00
  -1  -7   8 o   2.2(26)   3.4  180.00
  -1  -6   3 o  11.3(25)  15.6  180.00
  -1  -6   4 o   38(4)    34.    0.00 
  -1  -6   6 o   26(4)    24.   180.00
  -1  -6   7 o   74(5)    63.    0.00 
  -1  -6   8 o  14.6(34)  13.6   0.00 
  -1  -6   9 o   28(4)    21.    0.00 
  -1  -6  10 o   35(6)    17.    0.00 
  -1  -5   2 o   89(4)    98.    0.00 
  -1  -5   5 o  27.2(26)  27.0   0.00 
  -1  -5   6 o  19.8(21)  15.9   0.00 
  -1  -5   7 o  11.0(25)   7.0   0.00 
  -1  -5   8 o  37.2(34)  26.9   0.00 
  -1  -4   2 o  54.1(24)  56.5   0.00 
  -1  -4   3 o   8.1(17)  10.0  180.00
  -1  -4   5 o  13.8(21)  13.2  180.00
  -1  -3   3 o  34.7(21)  32.2   0.00 
  -1  -3   4 o   6.9(17)   8.0  180.00
   0 -13   6 <   28(13)    2.   180.00
   0 -13  12 <   38(26)    0.   180.00
   0 -12   6 <   42(19)    0.   180.00
   0 -12   7 <   49(24)    8.    0.00 
   0 -12  12 <   29(19)    1.    0.00 
   0 -12  15 <   33(28)    2.   180.00
   0 -11   4 <   24(15)    2.    0.00 
   0 -11   5 <   57(17)   19.    0.00 
   0 -11   9 <   10(14)    2.   180.00
   0 -11  10 <   22(15)    0.   180.00
   0 -11  13 <   21(15)    0.   180.00
   0 -11  14 <   24(17)    1.   180.00
   0 -10   6 <   16(8)     3.   180.00
   0 -10   9 <   28(9)     9.    0.00 
   0 -10  10 <   26(18)    6.    0.00 
   0  -9   3 o   13(7)     1.    0.00 
   0  -9   4 o    8(5)     3.   180.00
   0  -9   7 o   10(9)     3.    0.00 
   0  -9  13 <   12(7)     0.   180.00
   0  -8   3 o    5(4)     4.    0.00 
   0  -8   4 o   19(7)     1.    0.00 
   0  -8   5 o   17(4)    14.   180.00
   0  -8   8 o   15(5)    20.    0.00 
   0  -8  10 o    5(5)     7.   180.00
   0  -7   3 o   2.8(22)   3.8  180.00
   0  -7   5 o    6(5)     0.   180.00
   0  -7   6 o   4.0(29)   1.8  180.00
   0  -7   7 o   4.6(29)   1.4  180.00
   0  -7   9 o   31(9)    23.    0.00 
   0  -7  10 o   12(6)     0.    0.00 
   0  -6   2 o  37.3(28)  25.2  180.00
   0  -6   3 o   51(4)    47.    0.00 
   0  -6   4 o   6.8(27)   4.6   0.00 
   0  -6   5 o  25.0(29)  26.7   0.00 
   0  -6   6 o   199(7)   182.   0.00 
   0  -6   7 o  18.2(26)  20.7   0.00 
   0  -6   8 o   15(4)    11.    0.00 
   0  -6   9 o  14.8(27)  13.4  180.00
   0  -5   2 o   2.5(9)    0.5   0.00 
   0  -5   3 o  10.5(17)   8.5  180.00
   0  -5   4 o   102(4)   103.   0.00 
   0  -5   5 o  36.8(26)  36.5  180.00
   0  -5   6 o   3.7(12)   4.4   0.00 
   0  -5   7 o  13.8(31)  11.8  180.00
   0  -5   8 o   31(4)    20.   180.00
   0  -4   2 o   1.8(7)    1.6   0.00 
   0  -4   3 o   2.0(10)   0.9   0.00 
   0  -4   4 o  44.4(22)  41.3   0.00 
   0  -4   5 o  25.5(20)  27.1   0.00 
   0  -4   6 o   3.7(11)   5.2  180.00
   0  -3   1 o   6.9(8)    7.2   0.00 
   0  -3   2 o  56.4(21)  62.7   0.00 
   0  -3   4 o  18.0(12)  16.4   0.00 
   0  -2   1 o  63.5(30)  80.6   0.00 
   0  -2   2 o  24.1(16)  22.9   0.00 
   0  -2   3 o   9.0(11)   8.4   0.00 
_reflns_number_total                   81
_reflns_limit_h_min                    -4
_reflns_limit_h_max                    0
_reflns_limit_k_min                    -13
_reflns_limit_k_max                    -2
_reflns_limit_l_min                    1
_reflns_limit_l_max                    18
_reflns_d_resolution_high              0.493
_reflns_d_resolution_low               3.316
data_UNOFA_s_53


loop_
      _refln_index_h
      _refln_index_k
      _refln_index_l
      _refln_observed_status
      _refln_F_squared_meas
      _refln_F_squared_calc
      _refln_phase_calc
   1  -3  -2 o  16.2(10)  15.5   0.00 
   1  -2  -2 o  31.6(9)   27.2   0.00 
   1  -2  -1 o  84.6(21)  92.3   0.00 
   1  -1  -1 o   150(4)   117.   0.00 
   2  -6  -5 o   4.1(21)   4.8  180.00
   2  -6  -4 o  17.1(35)  21.7  180.00
   2  -5  -5 o   69(6)    68.   180.00
   2  -5  -4 o  14.5(24)  10.9  180.00
   2  -5  -3 o  60.4(34)  57.3   0.00 
   2  -5  -2 o   4.9(15)   7.5   0.00 
   2  -5  -1 o  15.2(18)  11.3  180.00
   2  -4  -4 o  21.3(19)  23.7  180.00
   2  -4  -3 o   8.1(12)   9.4   0.00 
   2  -4  -2 o   1.5(7)    2.0  180.00
   2  -4  -1 o  22.5(14)  20.0   0.00 
   2  -3  -3 o  85.8(20)  82.8   0.00 
   2  -3  -2 o  15.3(10)  14.8   0.00 
   2  -3  -1 o  19.2(11)  18.7  180.00
   2  -2  -2 o  15.7(9)   16.5   0.00 
   3  -9  -8 <   19(6)    36.    0.00 
   3  -9  -7 <   10(10)   16.    0.00 
   3  -8  -5 o   28(8)    43.   180.00
   3  -8  -4 o    7(6)     2.    0.00 
   3  -7  -5 o   7.4(35)   9.8  180.00
   3  -7  -4 o   1.7(30)   2.5  180.00
   3  -6  -6 o   44(5)    63.   180.00
   3  -6  -3 o   10(4)    16.   180.00
   3  -6  -2 o   21(4)    19.    0.00 
   3  -5  -6 o   6.4(26)   0.1   0.00 
   3  -5  -4 o   173(7)   191.   0.00 
   3  -5  -3 o   47(4)    50.   180.00
   3  -5  -2 o   9.4(27)   9.3   0.00 
   3  -4  -5 o   35(4)    35.   180.00
   3  -4  -4 o  54.9(33)  60.7  180.00
   3  -4  -2 o   1.1(10)   0.0  180.00
   3  -4  -1 o   2.4(10)   2.2   0.00 
   3  -3  -4 o   0.9(6)    2.0   0.00 
   3  -3  -3 o  74.6(25)  82.3   0.00 
   4 -12  -9 <   23(18)   14.    0.00 
   4 -11 -10 <   13(11)    0.    0.00 
   4 -10  -3 <    8(8)     0.   180.00
   4 -10  -2 <    5(6)     7.   180.00
   4  -9  -8 <   36(14)    2.    0.00 
   4  -9  -7 <   67(14)   70.   180.00
   4  -9  -6 <   51(11)   65.   180.00
   4  -9  -5 <   16(7)    22.   180.00
   4  -9  -4 <   12(6)     1.   180.00
   4  -9  -3 <    9(5)     1.   180.00
   4  -9  -2 <    8(4)     0.    0.00 
   4  -8  -6 o   14(5)    16.   180.00
   4  -8  -4 o    5(5)    10.    0.00 
   4  -8  -3 o   37(11)   21.    0.00 
   4  -7  -4 o    9(4)    13.   180.00
   4  -6  -7 o   33(7)    35.   180.00
   4  -6  -5 o    2(5)     1.    0.00 
   4  -6  -4 o   11(4)    11.   180.00
   4  -6  -3 o   25(5)    25.    0.00 
   4  -5  -6 o   35(6)    30.   180.00
   4  -5  -3 o   5.0(22)   7.2  180.00
   4  -5  -2 o   9.9(26)  10.9   0.00 
   4  -4  -5 o   84(5)    97.   180.00
   4  -4  -4 o   5.1(23)   5.4   0.00 
   4  -4  -3 o   87(4)    75.    0.00 
   5 -12  -8 <   17(12)    0.   180.00
   5 -12  -7 <   20(15)    3.   180.00
   5 -12  -4 <   22(8)     3.   180.00
   5 -11  -8 <   35(13)    6.   180.00
   5 -11  -5 <   47(15)    1.    0.00 
   5 -11  -4 <    1(8)     1.    0.00 
   5 -11  -3 <   19(8)     2.   180.00
   5 -10 -11 <   27(9)     3.   180.00
   5 -10  -5 <   27(9)     0.   180.00
   5 -10  -4 <   16(7)     4.    0.00 
   5 -10  -2 <   31(9)    12.   180.00
   5  -9  -8 <   17(7)    17.   180.00
   5  -9  -3 <   19(8)     0.    0.00 
   5  -9  -2 <   11(6)    17.    0.00 
   5  -8  -9 <   31(9)    29.   180.00
   5  -8  -8 <   21(9)    23.    0.00 
   5  -8  -7 <   15(8)     0.    0.00 
   5  -8  -6 o   38(8)    29.    0.00 
   5  -8  -5 o    3(7)    10.   180.00
   5  -8  -4 o   16(9)    10.    0.00 
   5  -8  -3 o   47(9)    42.   180.00
   5  -7  -7 o   32(8)    16.   180.00
   5  -7  -6 o   21(7)    15.   180.00
   5  -7  -3 o   35(6)    31.    0.00 
   5  -6  -7 o   26(9)    27.   180.00
   5  -6  -4 o   12(5)    15.    0.00 
   5  -6  -3 o   12(4)    17.    0.00 
   5  -6  -2 o   6.9(31)   0.4   0.00 
   5  -5  -5 o   11(4)     8.    0.00 
   5  -5  -4 o    9(4)     2.   180.00
   6 -11 -12 <    6(13)    0.    0.00 
   6 -11 -11 <   24(20)    1.    0.00 
   6 -10 -12 <   32(16)    0.    0.00 
   6 -10  -9 <    7(10)    5.    0.00 
   6 -10  -6 <   20(11)    0.    0.00 
   6  -9  -6 <   21(9)     0.    0.00 
   6  -9  -5 <   11(9)     0.    0.00 
   6  -9  -4 <   27(11)    8.   180.00
   6  -8  -8 <   11(7)    12.   180.00
   6  -8  -5 <   21(9)     4.    0.00 
   6  -8  -4 <    9(5)     6.    0.00 
   6  -8  -3 <    6(5)     6.   180.00
   6  -8  -2 <   29(8)    49.    0.00 
   6  -7  -8 o    5(6)     4.   180.00
   6  -7  -4 o   108(12)  126.   0.00 
   7 -11 -11 <   38(28)    0.    0.00 
   7 -10 -10 <   22(22)    0.   180.00
   7 -10  -8 <   12(10)    3.    0.00 
   7 -10  -4 <   39(12)    5.   180.00
   7  -9 -11 <   16(18)    4.   180.00
   7  -9 -10 <   13(9)    16.   180.00
   7  -9  -9 <    2(9)     4.   180.00
   7  -9  -3 <   23(9)     4.    0.00 
   7  -8  -6 <   10(7)     1.    0.00 
   7  -8  -2 <   10(7)     0.   180.00
   7  -7  -9 <   15(9)     4.   180.00
   7  -7  -7 <    6(5)     3.    0.00 
   7  -7  -6 <    2(8)     3.    0.00 
   8 -10  -8 <   30(14)    0.    0.00 
   8 -10  -5 <   12(13)    3.   180.00
   8 -10  -4 <   53(15)    1.    0.00 
   8  -9  -9 <   17(10)    3.   180.00
   8  -9  -8 <   17(16)    0.   180.00
   8  -9  -5 <   15(8)     4.    0.00 
   8  -9  -4 <   22(10)    1.    0.00 
   8  -9  -3 <   16(7)     0.    0.00 
   8  -8  -8 <   17(8)    16.   180.00
   9 -10  -4 <   21(12)    1.   180.00
_reflns_number_total                   65
_reflns_limit_h_min                    1
_reflns_limit_h_max                    9
_reflns_limit_k_min                    -12
_reflns_limit_k_max                    -1
_reflns_limit_l_min                    -12
_reflns_limit_l_max                    -1
_reflns_d_resolution_high              0.500
_reflns_d_resolution_low               4.683
data_UNOFA_s_54


loop_
      _refln_index_h
      _refln_index_k
      _refln_index_l
      _refln_observed_status
      _refln_F_squared_meas
      _refln_F_squared_calc
      _refln_phase_calc
   1  -2   1 o  43.6(22)  47.7   0.00 
   1  -2   2 o   4.3(10)   5.4  180.00
   2  -5   1 o   9.1(17)   9.9   0.00 
   2  -5   3 o  11.4(23)   8.6   0.00 
   2  -5   4 o   4.6(20)   8.0  180.00
   2  -5   5 o  24.5(24)  27.6   0.00 
   2  -4   1 o  14.9(19)  12.0   0.00 
   2  -4   2 o   5.1(11)   3.8  180.00
   2  -4   3 o  22.9(24)  21.6  180.00
   2  -3   1 o   190(4)   186.  180.00
   2  -3   2 o   115(4)   117.  180.00
   2  -3   3 o  40.8(24)  43.5   0.00 
   3  -8   1 o   24(6)    16.    0.00 
   3  -8   2 o   35(5)    40.   180.00
   3  -8   3 o   22(6)     8.    0.00 
   3  -8   5 o   14(4)    18.   180.00
   3  -8   6 o   37(8)    43.    0.00 
   3  -8   8 o    8(5)    15.    0.00 
   3  -8   9 o   33(6)    28.   180.00
   3  -7   2 o  10.7(29)  10.5  180.00
   3  -7   3 o   38(7)    29.   180.00
   3  -7   4 o    9(5)     9.    0.00 
   3  -7   5 o   44(5)    52.   180.00
   3  -7   8 o   42(6)    36.   180.00
   3  -6   1 o   8.0(26)   1.1   0.00 
   3  -6   3 o   20(4)    23.    0.00 
   3  -6   5 o   2.3(24)   0.7   0.00 
   3  -6   7 o  15.3(32)  11.2  180.00
   3  -5   1 o  22.0(32)  15.7   0.00 
   3  -5   2 o   6.3(19)   9.5  180.00
   3  -5   3 o  12.9(31)  11.8  180.00
   3  -5   4 o  25.5(25)  30.1  180.00
   3  -5   6 o  20.6(25)  17.9   0.00 
   3  -4   1 o   9.3(17)   6.1   0.00 
   3  -4   3 o   8.3(19)   5.9   0.00 
   3  -4   4 o   9.2(20)   9.1   0.00 
   3  -4   5 o  40.2(25)  34.3  180.00
   4 -11   6 <   15(10)    1.    0.00 
   4 -11   9 <   30(14)    0.    0.00 
   4 -10   1 <   77(12)   20.   180.00
   4 -10   3 <   38(16)    7.    0.00 
   4 -10   4 <    9(8)    11.    0.00 
   4 -10   5 <   17(11)    3.    0.00 
   4 -10   6 <    1(9)     4.    0.00 
   4 -10   8 <    9(11)    0.    0.00 
   4  -9   1 <   32(10)   16.    0.00 
   4  -9   2 <   62(18)   46.    0.00 
   4  -9   3 <   18(8)    29.    0.00 
   4  -9   6 <   32(9)    11.   180.00
   4  -9   7 <    5(8)     8.   180.00
   4  -9  10 <    5(6)     2.   180.00
   4  -8   4 o   61(10)   45.   180.00
   4  -8   5 o   53(16)    6.    0.00 
   4  -7   1 o   12(5)     5.   180.00
   4  -7   2 o    9(4)     6.   180.00
   4  -7   3 o   10(4)    13.    0.00 
   4  -7   6 o   7.3(32)   5.8  180.00
   4  -7   7 o   6.9(33)   6.6  180.00
   4  -7   8 o   23(7)    19.    0.00 
   4  -6   1 o   19(4)    14.   180.00
   4  -6   5 o    8(7)     5.    0.00 
   4  -6   7 o  10.2(34)   5.9   0.00 
   4  -5   1 o   3.0(23)   0.4  180.00
   4  -5   2 o   8.2(32)   7.5   0.00 
   4  -5   3 o   3.5(17)   1.6   0.00 
   4  -5   4 o  15.0(32)  11.0   0.00 
   5 -12   6 <   55(23)    2.   180.00
   5 -11   2 <   13(11)    0.   180.00
   5 -11   3 <   35(15)    1.    0.00 
   5 -11   4 <   22(11)    0.   180.00
   5 -11   6 <   19(15)    4.   180.00
   5 -11   7 <    6(15)    1.    0.00 
   5 -10   5 <    9(13)    0.   180.00
   5 -10   6 <   28(13)    0.   180.00
   5 -10   7 <    8(8)     0.   180.00
   5 -10   9 <   43(19)    0.    0.00 
   5  -9   1 <   30(8)    25.    0.00 
   5  -9   3 <    7(8)     4.   180.00
   5  -9   4 <   23(8)    22.   180.00
   5  -9   7 <   14(10)    3.    0.00 
   5  -8   1 o   25(12)   10.    0.00 
   5  -8   4 <   11(6)    13.    0.00 
   5  -8   9 <   18(8)     1.    0.00 
   5  -8  10 <   18(9)     7.   180.00
   5  -7   7 o   35(7)    16.   180.00
   5  -7   9 o   20(6)    16.    0.00 
   5  -6   4 o    9(4)    15.   180.00
   6 -12   2 <   32(15)    0.    0.00 
   6 -12   3 <   32(18)    1.   180.00
   6 -12   5 <   39(20)    2.   180.00
   6 -11   1 <   56(21)    1.   180.00
   6 -11   3 <    6(12)    3.   180.00
   6 -11   4 <   25(16)    0.   180.00
   6 -11   5 <   40(18)    3.    0.00 
   6 -11   9 <   11(11)    1.   180.00
   6 -11  11 <   36(21)    0.    0.00 
   6 -10   1 <   14(10)    0.    0.00 
   6 -10   4 <   14(10)    3.   180.00
   6 -10   8 <   29(10)    1.    0.00 
   6  -9   2 <    6(9)     2.   180.00
   6  -9   6 <   23(11)    1.   180.00
   6  -8   1 <   28(11)   13.    0.00 
   6  -8   3 <   17(11)   21.    0.00 
   6  -8   6 <   58(13)   64.   180.00
   6  -8   8 <   11(10)    7.   180.00
   6  -8  10 <   16(7)     8.    0.00 
   6  -7   1 o   28(9)    25.    0.00 
   6  -7   3 o   51(12)   24.   180.00
   6  -7   4 o   134(11)  116.  180.00
   6  -7   5 o   31(14)   16.   180.00
   6  -7   6 o   24(8)     1.   180.00
   6  -7   7 <   14(6)     0.    0.00 
   6  -7   8 <   173(17)  90.    0.00 
   7 -11   2 <   35(22)    0.   180.00
   7 -11   3 <   10(13)    0.    0.00 
   7 -10   9 <   62(17)    6.    0.00 
   7 -10  10 <   12(11)    4.   180.00
   7  -9   3 <   18(8)     0.   180.00
   7  -9   4 <   22(10)    3.   180.00
   7  -9   9 <   24(17)    0.    0.00 
   7  -9  11 <   20(10)    2.   180.00
   7  -8   1 <    5(12)    0.   180.00
   7  -8   2 <   13(12)    0.    0.00 
   7  -8   3 <   25(13)   18.   180.00
   7  -8   4 <   20(8)     2.   180.00
   7  -8   9 <   15(9)     0.    0.00 
   8 -10   5 <    6(14)    0.   180.00
   8 -10   6 <   23(20)   18.    0.00 
   8 -10   7 <    9(14)    1.   180.00
   8  -9   1 <   25(18)    2.   180.00
   8  -9   2 <   14(10)    1.    0.00 
   8  -9   4 <   25(11)    3.    0.00 
   8  -9   5 <   32(16)    1.    0.00 
   8  -9   6 <   14(12)   13.    0.00 
   8  -9   8 <   28(12)    2.   180.00
   8  -9  10 <    9(12)   14.   180.00
_reflns_number_total                   61
_reflns_limit_h_min                    1
_reflns_limit_h_max                    8
_reflns_limit_k_min                    -12
_reflns_limit_k_max                    -2
_reflns_limit_l_min                    1
_reflns_limit_l_max                    11
_reflns_d_resolution_high              0.494
_reflns_d_resolution_low               2.953
data_UNOFA_s_55


loop_
      _refln_index_h
      _refln_index_k
      _refln_index_l
      _refln_observed_status
      _refln_F_squared_meas
      _refln_F_squared_calc
      _refln_phase_calc
  -1 -13  -7 <   18(21)     0.    0.00 
  -1 -13  -4 <   142(27)    1.    0.00 
  -1 -13  -3 <   16(16)     1.    0.00 
  -1 -12  -5 <    4(8)      0.   180.00
  -1 -12  -4 <   30(19)     2.    0.00 
  -1 -11  -9 <   18(16)     4.   180.00
  -1 -11  -5 <   17(11)    21.    0.00 
  -1 -11  -4 <   74(19)    83.    0.00 
  -1 -10  -7 <   25(10)    38.    0.00 
  -1 -10  -4 <   16(8)      0.    0.00 
  -1  -9  -7 o   38(10)    37.   180.00
  -1  -9  -6 o   32(10)    41.    0.00 
  -1  -9  -4 o   35(6)     15.    0.00 
  -1  -7  -5 o   31(5)     28.   180.00
   0 -13 -12 <   110(29)    0.    0.00 
   0 -13  -9 <   39(17)     0.   180.00
   0 -13  -5 <   34(14)     1.    0.00 
   0 -13  -4 <   23(19)     0.    0.00 
   0 -12 -11 <   89(30)     0.    0.00 
   0 -12 -10 <    7(10)     7.    0.00 
   0 -12  -9 <   32(20)     0.    0.00 
   0 -12  -8 <   35(10)     1.    0.00 
   0 -12  -4 <    1(9)      4.   180.00
   0 -11  -8 <   11(8)      1.   180.00
   0 -11  -6 <   16(10)     0.   180.00
   0 -11  -5 <   33(11)    19.    0.00 
   0 -11  -3 <   10(8)     15.   180.00
   0 -10  -6 <   16(7)      3.   180.00
   0 -10  -2 <   12(8)      1.   180.00
   0  -9  -4 o   12(7)      3.    0.00 
   0  -9  -2 o    6(4)      0.    0.00 
   0  -9  -1 o   43(8)     29.   180.00
   0  -8  -3 o    9(5)      4.   180.00
   0  -7  -6 o    9(4)      2.    0.00 
   0  -7  -2 o   1.9(21)    3.0  180.00
   0  -7  -1 o   9.5(28)   14.2  180.00
   0  -6  -5 o   25(4)     27.   180.00
   0  -6  -4 o   2.0(25)    4.6   0.00 
   0  -6  -3 o   46(4)     47.   180.00
   0  -6  -2 o   22(4)     25.   180.00
   0  -6  -1 o   58(4)     57.   180.00
   0  -5  -4 o   99(4)     103.  180.00
   0  -5  -3 o  13.7(29)    8.5  180.00
   0  -5  -2 o   1.9(7)     0.5  180.00
   0  -5  -1 o   193(4)    207.   0.00 
   0  -4  -2 o   1.7(6)     1.6   0.00 
   0  -4  -1 o  64.0(20)   67.5   0.00 
   0  -3  -2 o  66.9(16)   62.7  180.00
   0  -3  -1 o   7.5(7)     7.2   0.00 
   0  -2  -1 o  84.9(21)   80.6  180.00
   1 -13  -5 <   20(11)     0.   180.00
   1 -12  -6 <    6(14)     9.    0.00 
   1 -11 -10 <   22(10)    29.   180.00
   1 -11  -9 <   28(14)    27.   180.00
   1 -11  -4 <   10(9)     20.   180.00
   1 -11  -2 <   18(9)      7.   180.00
   1 -10 -10 <   40(17)     0.    0.00 
   1 -10  -8 <    9(7)      0.   180.00
   1  -9  -7 o   11(7)      8.    0.00 
   1  -9  -3 o   21(6)     14.   180.00
   1  -9  -2 o   56(8)     52.   180.00
   1  -8  -3 o    8(4)     16.   180.00
   1  -8  -2 o    7(5)      1.   180.00
   1  -7  -7 o   16(4)      1.   180.00
   1  -7  -4 o    9(5)      6.   180.00
   1  -6  -6 o   31(5)     24.    0.00 
   1  -6  -4 o   29(4)     34.   180.00
   1  -6  -3 o   17(4)     16.   180.00
   1  -6  -2 o   8.6(21)   10.4   0.00 
   1  -6  -1 o  48.3(27)   41.1  180.00
   1  -5  -5 o  23.7(34)   27.0  180.00
   1  -5  -3 o   1.9(8)     0.6   0.00 
   1  -5  -2 o  101.3(34)  97.9   0.00 
   1  -5  -1 o  10.7(14)   11.3  180.00
   1  -4  -3 o   9.1(14)   10.0  180.00
   1  -4  -2 o  54.2(19)   56.5  180.00
   1  -4  -1 o   4.1(9)     2.3   0.00 
   1  -3  -3 o  33.1(12)   32.2  180.00
   1  -3  -2 o  16.9(9)    15.5   0.00 
   1  -3  -1 o  31.7(12)   31.0   0.00 
   2 -12 -11 <   28(13)     5.   180.00
   2 -12 -10 <   21(18)     3.   180.00
   2 -12  -7 <   38(20)     8.    0.00 
   2 -12  -5 <   23(13)     1.   180.00
   2 -12  -2 <   39(11)     6.    0.00 
   2 -11 -10 <   20(10)     1.   180.00
   2 -11  -7 <    7(15)     3.    0.00 
   2 -11  -2 <   23(14)     0.   180.00
   2 -10  -9 <   13(8)      4.    0.00 
   2 -10  -4 <   11(8)      2.    0.00 
   2 -10  -3 <    9(5)      0.    0.00 
   2  -9  -7 o   22(8)     16.    0.00 
   2  -9  -5 o   13(5)      0.   180.00
   2  -9  -4 o   14(5)     13.   180.00
   2  -9  -3 o    7(5)      1.   180.00
   2  -8  -8 o   10(6)      3.   180.00
   2  -8  -5 o    8(6)      1.   180.00
   2  -8  -3 o   18(5)     32.    0.00 
   2  -7  -6 o    7(5)      2.   180.00
   2  -7  -5 o  10.1(31)    9.5   0.00 
   2  -6  -6 o   3.3(33)    0.0   0.00 
   2  -6  -5 o   6.2(22)    4.8  180.00
   2  -6  -4 o   17(4)     22.   180.00
   2  -6  -3 o  19.5(29)   17.4  180.00
   2  -6  -2 o  29.0(30)   28.1  180.00
   2  -5  -5 o   62(4)     68.   180.00
   3 -12 -11 <   30(17)     8.    0.00 
   3 -12  -6 <    7(9)      1.    0.00 
   3 -12  -4 <   13(11)     1.    0.00 
   3 -11 -11 <   28(10)     7.   180.00
   3 -11 -10 <   36(11)    54.    0.00 
   3 -11  -8 <   19(9)      5.    0.00 
   3 -11  -6 <    3(8)      0.   180.00
   3 -11  -4 <   10(10)     0.   180.00
   3 -11  -2 <   17(7)     18.   180.00
   3 -10  -8 <   23(10)     1.    0.00 
   3 -10  -5 <   14(11)     5.    0.00 
   3 -10  -3 <   15(10)     0.    0.00 
   3  -9  -9 <   14(6)     11.    0.00 
   3  -9  -8 <   26(9)     36.    0.00 
   3  -9  -7 <   20(6)     16.    0.00 
   3  -9  -5 o   21(8)     24.   180.00
   3  -9  -4 o   38(10)    35.   180.00
   3  -8  -6 o   11(7)      0.   180.00
   4 -12  -9 <   24(17)    14.    0.00 
   4 -12  -7 <   13(9)      0.    0.00 
   4 -12  -4 <   34(11)     0.   180.00
   4 -11 -11 <   44(15)    14.    0.00 
_reflns_number_total                   65
_reflns_limit_h_min                    -1
_reflns_limit_h_max                    4
_reflns_limit_k_min                    -13
_reflns_limit_k_max                    -2
_reflns_limit_l_min                    -12
_reflns_limit_l_max                    -1
_reflns_d_resolution_high              0.493
_reflns_d_resolution_low               3.316
data_UNOFA_s_56


loop_
      _refln_index_h
      _refln_index_k
      _refln_index_l
      _refln_observed_status
      _refln_F_squared_meas
      _refln_F_squared_calc
      _refln_phase_calc
  -1 -13   3 <   31(18)    1.    0.00 
  -1 -13   4 <   17(12)    1.    0.00 
  -1 -13   5 <   30(12)    0.    0.00 
  -1 -13  10 <   11(13)    0.   180.00
  -1 -12   3 <   18(18)    1.    0.00 
  -1 -12   4 <   58(34)    0.   180.00
  -1 -12   5 <   17(15)    8.   180.00
  -1 -12   6 <   18(15)    9.   180.00
  -1 -12   7 <   56(23)   39.   180.00
  -1 -12   8 <   38(19)    1.    0.00 
  -1 -12  10 <   12(11)    1.    0.00 
  -1 -11   2 <   18(8)     7.   180.00
  -1 -11   4 <   101(16)  20.   180.00
  -1 -11   5 <   69(14)   22.   180.00
  -1 -11   6 <   53(17)   16.    0.00 
  -1 -11   8 <   46(14)    9.    0.00 
   0 -13   2 <    7(13)    2.    0.00 
   0 -13   5 <   38(22)    1.    0.00 
   0 -13   6 <   22(18)    2.   180.00
   0 -13   9 <   43(24)    0.   180.00
   0 -13  10 <    8(19)    1.    0.00 
   0 -12   5 <   35(16)    8.   180.00
   0 -12   8 <    5(11)    1.    0.00 
   0 -12  13 <   19(14)    0.    0.00 
   0 -11   3 <   30(16)   15.   180.00
   0 -11   5 <   32(10)   19.    0.00 
   0 -11   7 <   20(13)   16.    0.00 
   0 -11   9 <   14(12)    2.   180.00
   0 -10   3 <    9(7)     0.   180.00
   0 -10   6 <    6(7)     3.   180.00
   0 -10  10 <    3(6)     6.    0.00 
   0 -10  11 <   11(6)     1.    0.00 
   0  -9   1 o   137(15)  29.   180.00
   0  -9   9 o   12(7)    10.    0.00 
   0  -8   5 o   14(4)    14.   180.00
   0  -8   6 o    9(5)     4.    0.00 
   0  -8   7 o    9(4)     1.   180.00
   0  -8   8 o   12(7)    20.    0.00 
   0  -7   1 o   26(5)    14.   180.00
   0  -7   2 o   5.8(33)   3.0   0.00 
   0  -7   4 o   9.1(30)   0.2  180.00
   0  -7   5 o   5.0(29)   0.0  180.00
   0  -6   1 o   60(4)    57.    0.00 
   0  -6   2 o  23.0(27)  25.2  180.00
   0  -6   3 o   47(4)    47.    0.00 
   0  -6   4 o   4.6(24)   4.6   0.00 
   0  -6   5 o  25.3(28)  26.7   0.00 
   0  -6   6 o   170(6)   182.   0.00 
   0  -5   1 o   219(5)   207.   0.00 
   0  -5   2 o   2.3(13)   0.5   0.00 
   0  -5   3 o   9.9(19)   8.5  180.00
   0  -5   4 o   95(4)    103.   0.00 
   0  -5   5 o  37.6(25)  36.5  180.00
   0  -4   1 o  75.8(26)  67.5  180.00
   0  -4   2 o   2.8(8)    1.6   0.00 
   0  -4   3 o   1.6(9)    0.9   0.00 
   0  -4   4 o  36.4(22)  41.3   0.00 
   0  -3   1 o   7.6(10)   7.2   0.00 
   0  -3   2 o  52.1(23)  62.7   0.00 
   0  -3   3 o   0.7(5)    0.0  180.00
   0  -2   1 o  67.7(35)  80.6   0.00 
   0  -2   2 o  15.3(16)  22.9   0.00 
   1 -13   1 <   41(18)    1.   180.00
   1 -12   6 <   33(11)    6.    0.00 
   1 -12   7 <   37(20)    1.   180.00
   1 -12   8 <    8(11)    2.    0.00 
   1 -12  12 <   16(14)    0.   180.00
   1 -12  13 <   25(15)    0.   180.00
   1 -11   4 <   88(22)   83.    0.00 
   1 -11   5 <   22(10)   21.   180.00
   1 -10   7 <   27(17)   38.    0.00 
   1 -10   8 <   23(12)    9.    0.00 
   1 -10   9 <   22(11)    7.    0.00 
   1 -10  11 <   10(11)    0.    0.00 
   1  -9   2 o   13(6)    28.    0.00 
   1  -9   3 o   12(8)     7.    0.00 
   1  -9   6 o   23(6)    41.    0.00 
   1  -9   7 o   62(13)   37.    0.00 
   1  -9   9 o   13(5)     6.   180.00
   1  -9  10 <   43(9)    30.   180.00
   1  -8   1 o    3(4)    12.    0.00 
   1  -8   2 o    9(5)     1.    0.00 
   1  -8   4 o    9(5)     1.   180.00
   1  -7   2 o   3.7(24)   0.1  180.00
   1  -7   3 o    7(4)    16.   180.00
   1  -7   4 o   3.8(31)   0.3  180.00
   1  -7   5 o   22(4)    28.    0.00 
   1  -7   6 o  17.8(34)  17.2   0.00 
   1  -7   7 o    6(4)     1.   180.00
   1  -6   1 o  12.6(28)   7.4  180.00
   1  -6   2 o   5.0(26)   9.4   0.00 
   1  -6   3 o   55(5)    52.    0.00 
   1  -6   4 o   1.9(20)   1.4  180.00
   1  -6   5 o   58(4)    54.    0.00 
   1  -6   6 o   29(4)    29.   180.00
   1  -5   1 o  44.8(27)  35.3   0.00 
   1  -5   2 o   162(5)   156.  180.00
   1  -5   3 o  71.0(34)  66.8   0.00 
   1  -5   4 o   5.0(20)   3.0   0.00 
   1  -5   5 o  53.6(31)  53.3  180.00
   1  -4   1 o   8.1(12)   6.8   0.00 
   1  -4   2 o  77.5(28)  74.4   0.00 
   1  -4   3 o  16.3(17)  18.5  180.00
   1  -4   4 o   3.5(11)   2.0   0.00 
   2 -13   1 <   21(20)    0.    0.00 
   2 -12   5 <   32(17)    4.    0.00 
   2 -12   6 <   16(17)    0.    0.00 
   2 -12  10 <   13(11)    2.   180.00
   2 -12  13 <   51(19)    1.   180.00
   2 -11   1 <    7(14)   10.    0.00 
   2 -11   2 <   19(11)   17.   180.00
   2 -11   4 <   10(14)    0.    0.00 
   2 -11   6 <   24(11)   18.    0.00 
   2 -11  10 <    8(10)    1.    0.00 
   2 -11  12 <   17(13)    1.    0.00 
   2 -10   7 <   19(13)   12.    0.00 
   2 -10   8 <   18(10)    0.    0.00 
   2  -9   1 o   40(9)    21.    0.00 
   2  -9   3 o   18(9)    18.    0.00 
   2  -9   4 o   19(8)    12.    0.00 
   2  -9   7 o   57(13)   52.   180.00
   2  -9   8 <   40(9)    48.   180.00
   2  -9   9 <   65(14)   30.   180.00
   2  -9  10 <    7(6)     1.   180.00
   2  -8   1 o   11(6)     6.   180.00
   2  -8   2 o   10(6)    10.   180.00
   2  -8   4 o   16(4)    19.    0.00 
   2  -8   5 o   44(9)    34.   180.00
   2  -8   8 o   45(8)    39.   180.00
   2  -8   9 o   21(6)    12.    0.00 
   2  -7   3 o   17(5)     7.   180.00
   2  -7   7 o   14(4)     9.    0.00 
   2  -6   1 o  20.9(31)  13.1  180.00
   3 -13   3 <   15(20)    0.   180.00
   3 -13   5 <   34(21)    5.    0.00 
   3 -13   8 <   19(15)    1.   180.00
   3 -12   1 <   32(12)    0.   180.00
   3 -12   7 <   32(18)    4.   180.00
   3 -11   2 <   47(21)    0.    0.00 
   3 -11   9 <   42(19)    0.   180.00
   3 -11  12 <   32(14)   12.    0.00 
   3 -10   1 <   16(8)     9.   180.00
   3 -10   3 <   23(14)    4.   180.00
   3 -10   4 <   29(8)     0.   180.00
   3 -10   7 <   16(12)    1.   180.00
   3 -10   8 <   42(15)    2.    0.00 
   3 -10   9 <    6(12)    0.   180.00
   3 -10  10 <   29(12)    3.    0.00 
   3  -9   1 o   19(10)    6.   180.00
   4 -12   3 <   40(18)    0.   180.00
_reflns_number_total                   73
_reflns_limit_h_min                    -1
_reflns_limit_h_max                    4
_reflns_limit_k_min                    -13
_reflns_limit_k_max                    -2
_reflns_limit_l_min                    1
_reflns_limit_l_max                    13
_reflns_d_resolution_high              0.492
_reflns_d_resolution_low               3.316
data_UNOFA_s_57


loop_
      _refln_index_h
      _refln_index_k
      _refln_index_l
      _refln_observed_status
      _refln_F_squared_meas
      _refln_F_squared_calc
      _refln_phase_calc
  -1 -12 -14 <   21(19)    0.    0.00 
  -1 -12 -14 <   28(18)    0.    0.00 
  -1 -12 -10 <   34(21)    0.   180.00
  -1 -12 -10 <   48(16)    0.   180.00
  -1 -11 -20 <   14(22)    0.    0.00 
  -1 -11 -16 <   27(21)    1.    0.00 
  -1 -11 -12 <   12(19)   24.   180.00
  -1 -11 -11 <   42(17)    1.   180.00
  -1 -11 -10 <   61(23)    0.   180.00
  -1 -10 -23 <   65(26)    0.   180.00
  -1 -10 -16 <   27(20)    1.    0.00 
  -1 -10 -15 <   12(12)   11.   180.00
  -1 -10 -11 <   13(10)    0.    0.00 
  -1  -9 -18 <   13(10)    1.    0.00 
  -1  -9 -17 <   30(19)    6.   180.00
  -1  -9 -11 <   88(19)   32.    0.00 
  -1  -8 -20 <   252(24)  21.   180.00
  -1  -8 -17 <   43(18)   10.    0.00 
  -1  -8 -16 <   50(15)   28.    0.00 
  -1  -8 -14 o   21(12)    0.    0.00 
   0 -12 -18 <   13(17)    3.   180.00
   0 -12 -15 <   46(26)    2.    0.00 
   0 -12 -13 <   28(13)    0.   180.00
   0 -12 -11 <   46(18)    0.    0.00 
   0 -11 -20 <   56(21)   13.   180.00
   0 -11 -18 <   43(15)    0.    0.00 
   0 -11 -17 <   25(15)   19.    0.00 
   0 -11 -12 <    0(11)    0.    0.00 
   0 -10 -23 <   31(13)    5.    0.00 
   0 -10 -20 <   10(12)    8.    0.00 
   0 -10 -17 <   32(16)    9.    0.00 
   0 -10 -16 <   18(15)    0.   180.00
   0 -10 -10 <   17(9)     6.    0.00 
   0  -9 -20 <   16(11)    0.   180.00
   0  -9 -19 <   16(11)    1.    0.00 
   0  -9 -17 <   16(10)    0.   180.00
   0  -9 -14 <   17(9)    14.   180.00
   0  -9 -13 <   13(8)     0.   180.00
   0  -9 -12 <    8(8)     4.    0.00 
   0  -9  -7 o   13(8)     3.    0.00 
   0  -9  -6 o   10(8)     2.   180.00
   0  -8 -19 <   30(16)   12.    0.00 
   0  -8 -17 <   48(10)    8.    0.00 
   0  -8 -15 o   19(10)    9.    0.00 
   0  -8  -8 o   31(8)    20.    0.00 
   0  -8  -7 o   16(7)     1.    0.00 
   0  -8  -5 o   23(9)    14.    0.00 
   0  -7 -16 o   27(9)    15.   180.00
   0  -7 -14 o   11(5)    10.   180.00
   0  -7  -9 o   19(7)    23.    0.00 
   0  -7  -6 o   11(6)     2.    0.00 
   0  -7  -5 o   2.0(31)   0.0  180.00
   0  -6 -12 o    5(4)    10.   180.00
   0  -6 -11 o   18(7)    17.    0.00 
   0  -6  -9 o   13(6)    13.    0.00 
   0  -6  -8 o   8.2(30)  10.8   0.00 
   0  -6  -7 o   29(6)    21.   180.00
   0  -6  -6 o   185(8)   182.   0.00 
   0  -6  -5 o   28(5)    27.   180.00
   0  -5 -12 o   9.2(34)   9.3   0.00 
   0  -5 -11 o   16(4)    14.    0.00 
   0  -5 -10 o   1.7(18)   1.4   0.00 
   0  -5  -9 o   84(6)    86.   180.00
   0  -5  -8 o   23(4)    20.    0.00 
   0  -5  -6 o   5.0(15)   4.4  180.00
   0  -5  -5 o   34(4)    37.   180.00
   0  -5  -4 o   101(4)   103.  180.00
   0  -4  -9 o  15.0(23)  13.7  180.00
   0  -4  -7 o   4.3(22)   2.8   0.00 
   0  -4  -6 o   5.4(15)   5.2  180.00
   0  -4  -5 o  28.3(21)  27.1  180.00
   0  -4  -4 o  37.3(21)  41.3   0.00 
   0  -3  -7 o   9.0(12)   9.9  180.00
   0  -3  -6 o   0.7(5)    1.5  180.00
   0  -3  -5 o   1.9(6)    1.0  180.00
   0  -3  -4 o  18.0(14)  16.4  180.00
   0  -3  -3 o   0.7(4)    0.0  180.00
   0  -3  -2 o  62.8(17)  62.7  180.00
   0  -2  -4 o   6.1(7)    7.1  180.00
   0  -2  -3 o   7.8(7)    8.4  180.00
   0  -2  -2 o  23.1(11)  22.9   0.00 
   0  -1  -2 o   105(5)   95.   180.00
   0  -1  -1 o   2.0(5)    2.2   0.00 
   1 -13  -9 <   50(24)    0.   180.00
   1 -12 -18 <   40(24)    3.    0.00 
   1 -12 -15 <   29(19)    1.    0.00 
   1 -12 -13 <   23(12)    3.    0.00 
   1 -12 -12 <   47(18)    4.    0.00 
   1 -11 -18 <   117(26)  46.    0.00 
   1 -11 -13 <   17(11)    0.    0.00 
   1 -11 -11 <   26(11)   18.   180.00
   1 -11  -9 <   71(14)   27.   180.00
   1 -10 -23 <   25(15)    7.    0.00 
   1 -10 -23 <   20(12)    7.    0.00 
   1 -10 -21 <   67(18)   38.    0.00 
   1 -10 -16 <   15(10)   16.   180.00
   1 -10  -9 <   24(14)    1.    0.00 
   1  -9 -18 <   24(8)     3.    0.00 
   1  -9 -17 <    8(8)     6.   180.00
   1  -9 -16 <   34(9)    20.    0.00 
   1  -9 -13 <   38(14)   23.    0.00 
   1  -9 -12 <   51(14)   42.   180.00
   1  -9 -11 <   22(8)     9.    0.00 
   1  -9  -9 o    5(9)     0.    0.00 
   1  -9  -7 o    6(6)     8.    0.00 
   1  -8 -18 <   12(6)     6.    0.00 
   1  -8 -12 o    5(6)     6.    0.00 
   1  -8  -7 o   10(6)     3.   180.00
   1  -7 -16 o    4(4)     1.    0.00 
   1  -7 -13 o    5(7)     0.   180.00
   1  -7  -9 o    3(4)     9.   180.00
   1  -7  -6 o   1.5(29)  14.9  180.00
   1  -6 -13 o   24(5)    17.   180.00
   1  -6 -11 o   40(5)    38.   180.00
   1  -6 -10 o   17(4)    17.   180.00
   1  -6  -9 o   23(5)    21.    0.00 
   1  -6  -8 o   19(4)    14.   180.00
   1  -6  -7 o   62(5)    63.    0.00 
   1  -6  -6 o  13.0(28)  24.0   0.00 
   1  -5 -10 o   9.7(22)  15.6  180.00
   1  -5  -9 o  18.0(25)   7.5   0.00 
   1  -5  -5 o  28.9(31)  27.0  180.00
   2 -12 -18 <   52(26)    3.   180.00
   2 -12 -12 <   24(20)    0.   180.00
   2 -12 -11 <   39(17)    5.   180.00
   2 -11 -21 <   32(12)   10.    0.00 
   2 -11 -17 <   51(21)    7.   180.00
   2 -11 -16 <   39(20)    0.   180.00
   2 -11 -13 <   25(11)   25.   180.00
   2 -11 -11 <   24(13)    6.   180.00
   2 -10  -9 <   19(12)    4.    0.00 
_reflns_number_total                   61
_reflns_limit_h_min                    -1
_reflns_limit_h_max                    2
_reflns_limit_k_min                    -13
_reflns_limit_k_max                    -1
_reflns_limit_l_min                    -23
_reflns_limit_l_max                    -1
_reflns_d_resolution_high              0.495
_reflns_d_resolution_low               6.358
data_UNOFA_s_58


loop_
      _refln_index_h
      _refln_index_k
      _refln_index_l
      _refln_observed_status
      _refln_F_squared_meas
      _refln_F_squared_calc
      _refln_phase_calc
   1  -3  -7 o   4.1(8)    2.8   0.00 
   1  -3  -6 o   1.0(5)    1.6   0.00 
   1  -3  -5 o   9.2(13)   7.2  180.00
   1  -3  -4 o   7.7(9)    8.0  180.00
   1  -3  -3 o  31.4(16)  32.2  180.00
   1  -2  -4 o   1.0(5)    0.7  180.00
   1  -2  -2 o  21.5(18)  27.2   0.00 
   2  -6 -14 o   31(7)    13.   180.00
   2  -6 -13 o   85(9)    75.    0.00 
   2  -6 -12 o   117(9)   113.  180.00
   2  -6 -11 o   3.6(27)   3.1   0.00 
   2  -6 -10 o    4(4)     0.   180.00
   2  -6  -8 o   114(7)   110.   0.00 
   2  -6  -7 o   48(4)    46.    0.00 
   2  -5 -12 o  12.3(28)  15.7   0.00 
   2  -5 -11 o   4.9(24)   5.3   0.00 
   2  -5 -10 o   156(6)   143.   0.00 
   2  -5  -9 o   9.2(22)   7.2   0.00 
   2  -5  -7 o   106(5)   102.  180.00
   2  -5  -6 o  21.4(24)  22.8  180.00
   2  -5  -5 o   64(4)    68.   180.00
   2  -4 -10 o   9.5(18)   4.2   0.00 
   2  -4  -9 o   4.6(15)   3.6   0.00 
   2  -4  -8 o  13.0(16)  16.4  180.00
   2  -4  -5 o   7.2(11)   5.1  180.00
   2  -4  -4 o  23.9(19)  23.7  180.00
   2  -3  -7 o  28.1(22)  27.3  180.00
   2  -3  -6 o  26.7(18)  24.5   0.00 
   2  -3  -5 o   4.9(10)   3.9  180.00
   2  -3  -4 o   2.9(11)   3.0   0.00 
   2  -3  -3 o  66.2(26)  82.8   0.00 
   3 -10 -18 <   54(21)    1.    0.00 
   3 -10 -16 <   26(16)    2.   180.00
   3 -10 -15 <   33(11)    1.   180.00
   3 -10 -11 <    6(9)     1.   180.00
   3 -10 -10 <   35(15)    5.   180.00
   3 -10  -9 <   22(15)    1.   180.00
   3  -9 -22 <   39(14)    0.   180.00
   3  -9 -21 <   11(10)    1.    0.00 
   3  -9 -20 <   20(15)    1.    0.00 
   3  -9 -16 <   17(17)   21.   180.00
   3  -9 -10 <   11(10)    7.    0.00 
   3  -9  -9 <   11(10)   11.    0.00 
   3  -9  -8 <   61(12)   36.    0.00 
   3  -8 -18 <    8(12)   12.   180.00
   3  -8 -17 <   29(13)   23.   180.00
   3  -8 -16 <    4(7)     1.    0.00 
   3  -8 -15 <   23(13)    3.    0.00 
   3  -8 -14 <   34(10)   24.    0.00 
   3  -8 -13 o    7(7)     9.    0.00 
   3  -8  -9 o   58(12)   46.    0.00 
   3  -8  -7 o   19(7)    16.   180.00
   3  -7 -16 o    9(6)     0.    0.00 
   3  -7 -15 o   24(6)    12.    0.00 
   3  -7 -14 o   20(7)     3.    0.00 
   3  -7 -13 o    3(7)     2.   180.00
   3  -7 -12 o   29(8)    10.    0.00 
   3  -7 -11 o   23(7)    21.   180.00
   3  -7  -9 o    5(6)     4.    0.00 
   3  -6 -15 o   35(6)    38.   180.00
   3  -6 -14 o   97(10)   64.    0.00 
   3  -6 -13 o   56(7)    56.   180.00
   3  -6 -12 o   16(6)    16.    0.00 
   3  -6 -11 o   69(8)    52.    0.00 
   3  -6 -10 o   10(4)     6.   180.00
   3  -6  -9 o   44(6)    48.    0.00 
   3  -6  -8 o  11.2(26)  11.2  180.00
   3  -6  -7 o   4.2(22)   8.1   0.00 
   3  -6  -6 o   63(5)    63.   180.00
   3  -5 -12 o   69(5)    63.   180.00
   3  -5 -11 o   44(4)    35.    0.00 
   3  -5  -8 o   122(6)   111.  180.00
   3  -5  -7 o   2.0(12)   1.6   0.00 
   3  -5  -5 o   6.9(16)   3.3  180.00
   3  -4 -10 o   4.7(18)   8.5  180.00
   3  -4  -9 o   6.5(19)   5.7   0.00 
   3  -4  -8 o  27.9(31)  26.3   0.00 
   3  -4  -7 o   2.9(14)   5.1   0.00 
   4 -12 -14 <    8(14)    7.    0.00 
   4 -11 -15 <   20(24)    6.   180.00
   4 -10 -19 <    9(12)    0.   180.00
   4 -10 -11 <   18(13)    1.   180.00
   4 -10  -9 <   10(8)     1.    0.00 
   4  -9 -17 <   15(10)    0.   180.00
   4  -9 -10 <   41(15)   28.    0.00 
   4  -8 -19 <   19(13)    2.   180.00
   4  -8 -17 <   58(17)   19.    0.00 
   4  -8 -10 o   17(8)    10.    0.00 
   4  -8  -9 o   56(11)   52.   180.00
   4  -7 -17 <   15(14)    0.    0.00 
   4  -7 -14 o   22(8)    10.   180.00
   4  -7 -12 o    5(7)     8.    0.00 
   4  -7 -10 o    4(4)     0.   180.00
   4  -7  -9 o   19(5)     5.   180.00
   4  -7  -8 o   15(5)     6.   180.00
   4  -7  -7 o    7(4)     1.    0.00 
   4  -6 -12 o   34(8)    24.    0.00 
   4  -6 -11 o   15(5)    13.   180.00
   4  -6 -10 o   13(4)    23.    0.00 
   4  -6  -7 o   40(6)    35.   180.00
   4  -5 -13 o   25(5)     9.    0.00 
   4  -5 -12 o   3.8(22)   0.9  180.00
   5 -12 -12 <    8(18)    2.    0.00 
   5 -11 -16 <   36(19)    3.   180.00
   5 -11 -15 <   27(13)    0.   180.00
   5 -11 -10 <   27(11)    3.   180.00
   5 -10 -17 <   51(20)    1.    0.00 
   5 -10 -16 <    4(11)    1.    0.00 
   5 -10 -13 <    9(10)    2.   180.00
   5  -9 -14 <   19(12)    0.   180.00
   5  -9 -10 <   27(8)    15.   180.00
   5  -9  -9 <   26(10)    3.    0.00 
   5  -8 -19 <   31(16)    8.   180.00
   5  -8 -12 <   27(12)   28.   180.00
   5  -8 -11 <   16(6)    20.    0.00 
   5  -8  -9 <   23(6)    29.   180.00
   5  -8  -8 <   48(14)   23.    0.00 
   5  -7 -15 <    8(6)     2.    0.00 
   5  -7 -11 o   12(6)     3.   180.00
   5  -7 -10 o   33(7)    11.    0.00 
   5  -7  -9 o   12(6)     6.   180.00
   5  -7  -8 o    9(5)     1.    0.00 
   6 -11 -15 <   16(13)    1.    0.00 
   6 -11 -14 <   18(18)    3.   180.00
   6 -10 -17 <   20(11)    0.    0.00 
   6 -10 -15 <   25(11)    1.   180.00
   6  -9 -15 <   28(13)    1.   180.00
   6  -9 -14 <   20(9)     2.    0.00 
   6  -9 -12 <   70(17)   40.    0.00 
   6  -8 -15 <   48(14)    1.   180.00
   6  -8 -14 <   33(12)   13.    0.00 
   7 -10 -12 <    6(10)    0.    0.00 
   7  -9 -21 <   37(25)    1.   180.00
   7  -9 -17 <   21(13)    6.   180.00
_reflns_number_total                   78
_reflns_limit_h_min                    1
_reflns_limit_h_max                    7
_reflns_limit_k_min                    -12
_reflns_limit_k_max                    -2
_reflns_limit_l_min                    -22
_reflns_limit_l_max                    -2
_reflns_d_resolution_high              0.498
_reflns_d_resolution_low               2.907
data_UNOFA_s_59


loop_
      _refln_index_h
      _refln_index_k
      _refln_index_l
      _refln_observed_status
      _refln_F_squared_meas
      _refln_F_squared_calc
      _refln_phase_calc
  -9  -8 -13 <   32(15)    0.   180.00
  -9  -7 -13 <   77(21)    3.   180.00
  -8  -8 -17 <   15(11)    0.   180.00
  -8  -8 -13 <    9(12)    3.    0.00 
  -8  -8 -12 <   18(10)    0.    0.00 
  -8  -7 -16 <    3(14)    3.   180.00
  -8  -7 -15 <   14(8)     0.    0.00 
  -8  -7 -13 <   24(17)    9.   180.00
  -8  -7 -12 <   33(14)    8.    0.00 
  -8  -6 -15 <   17(11)    1.   180.00
  -7  -9 -19 <   17(11)    0.   180.00
  -7  -9 -15 <   15(14)    1.   180.00
  -7  -9 -11 <   36(20)    2.    0.00 
  -7  -8 -19 <   15(12)    1.   180.00
  -7  -8 -16 <   40(22)    3.    0.00 
  -7  -7 -16 <   12(11)    2.   180.00
  -7  -7 -15 <   27(8)    19.    0.00 
  -7  -7 -14 <   57(16)   25.   180.00
  -7  -7 -13 <   16(7)     1.    0.00 
  -7  -7 -11 <   22(11)    3.    0.00 
  -7  -6 -14 <    6(7)     0.    0.00 
  -7  -5 -11 <   32(8)    11.    0.00 
  -6 -10 -15 <   28(22)    7.   180.00
  -6 -10 -11 <   13(10)    0.    0.00 
  -6  -8 -16 <    4(7)     0.   180.00
  -6  -7 -18 <   18(9)     3.   180.00
  -6  -7 -17 <    7(6)     0.   180.00
  -6  -7 -15 <   19(9)     1.   180.00
  -6  -7 -14 <   32(12)    1.    0.00 
  -6  -7  -9 <   20(9)     7.   180.00
  -6  -7  -8 <   218(24)  90.   180.00
  -6  -6 -13 <   11(6)     2.    0.00 
  -6  -6 -12 <    8(8)     0.    0.00 
  -6  -6  -9 o   10(5)     2.   180.00
  -6  -5 -13 o   15(6)     7.   180.00
  -6  -5 -12 o   14(7)     3.    0.00 
  -6  -5 -10 o   12(7)     6.    0.00 
  -6  -5  -9 o    3(5)     0.    0.00 
  -5 -11 -14 <   33(16)    1.   180.00
  -5 -10 -16 <   14(16)    7.   180.00
  -5  -9 -17 <   37(13)    1.   180.00
  -5  -9 -17 <   11(8)     1.   180.00
  -5  -9 -14 <   19(13)    3.    0.00 
  -5  -9 -13 <   29(11)    1.    0.00 
  -5  -9 -12 <   31(14)   12.    0.00 
  -5  -9 -10 <   16(10)    0.    0.00 
  -5  -9  -9 <   23(11)    0.   180.00
  -5  -9  -8 <   22(8)     1.   180.00
  -5  -8 -17 <   18(11)    5.   180.00
  -5  -8 -16 <   20(14)    0.    0.00 
  -5  -8 -16 <    6(11)    0.    0.00 
  -5  -8 -14 <   12(7)     5.   180.00
  -5  -8 -13 <   13(13)   12.   180.00
  -5  -7 -16 <   13(9)    19.   180.00
  -5  -7 -13 <   26(9)     9.    0.00 
  -5  -7 -10 o   15(10)    6.   180.00
  -5  -7  -9 o   29(8)    16.   180.00
  -5  -7  -8 o   12(7)     3.    0.00 
  -5  -7  -7 o   14(12)   16.    0.00 
  -5  -6 -12 o    5(5)     7.    0.00 
  -5  -6 -11 o    9(4)     0.   180.00
  -5  -6 -10 o    5(4)     9.    0.00 
  -5  -6  -9 o    6(6)     5.   180.00
  -5  -5 -13 o    6(4)     3.    0.00 
  -5  -5 -12 o   12(4)    19.    0.00 
  -5  -5 -11 o    4(5)     8.    0.00 
  -5  -5  -7 o    7(5)    10.    0.00 
  -5  -4 -10 o   23(6)    26.   180.00
  -5  -4  -9 o   2.0(29)   5.3  180.00
  -5  -4  -8 o   22(7)    27.   180.00
  -4  -9 -16 <   13(9)     4.    0.00 
  -4  -9 -15 <    9(11)    0.   180.00
  -4  -9 -11 <   14(6)     3.    0.00 
  -4  -8 -13 <   24(7)    28.    0.00 
  -4  -8 -12 <   22(13)   41.    0.00 
  -4  -8 -10 <   13(8)     5.    0.00 
  -4  -8  -7 o   11(4)     2.    0.00 
  -4  -7 -14 <   93(11)   74.    0.00 
  -4  -7 -10 o   135(12)  147.  180.00
  -4  -7  -9 o    6(5)     1.    0.00 
  -4  -7  -8 o   14(5)    19.   180.00
  -4  -6 -13 o   16(8)     1.    0.00 
  -4  -6 -12 o   23(5)    13.   180.00
  -4  -6 -10 o    6(4)     7.    0.00 
  -4  -6  -7 o    7(4)     6.   180.00
  -4  -5 -11 o   27(6)    24.   180.00
  -4  -5 -10 o   2.9(25)   4.0  180.00
  -4  -5  -9 o   4.3(24)   5.6   0.00 
  -4  -5  -6 o    5(4)     1.    0.00 
  -4  -4  -9 o  23.1(34)  22.1  180.00
  -4  -4  -7 o   7.1(22)  10.4   0.00 
  -4  -4  -6 o   33(5)    27.   180.00
  -4  -3  -7 o   8.7(24)   8.4   0.00 
  -3  -7 -12 o   12(4)    13.   180.00
  -3  -7 -11 o   66(10)   45.   180.00
  -3  -7 -10 o    5(5)     0.    0.00 
  -3  -6 -11 o   7.1(30)  13.3   0.00 
  -3  -6 -10 o   15(5)     4.   180.00
  -3  -6  -9 o    5(4)     0.   180.00
  -3  -6  -6 o   2.2(25)   0.0  180.00
  -3  -5 -10 o   8.9(28)   7.8  180.00
  -3  -5  -9 o   18(4)    16.   180.00
  -3  -5  -7 o   6.6(31)   5.4   0.00 
  -3  -5  -6 o   11(4)    18.    0.00 
  -3  -5  -5 o   8.9(35)   1.4  180.00
  -3  -4  -9 o  24.9(31)  25.5   0.00 
  -3  -4  -8 o   6.2(18)  10.4  180.00
  -3  -4  -7 o  29.9(30)  35.9  180.00
  -3  -4  -6 o   24(4)    29.    0.00 
  -3  -4  -5 o  35.2(30)  34.3  180.00
  -3  -3  -9 o  75.2(34)  74.6  180.00
  -3  -3  -8 o  32.5(27)  31.9   0.00 
  -3  -3  -7 o  45.5(26)  47.1  180.00
  -3  -3  -5 o  26.8(22)  25.7  180.00
  -2  -4  -7 o  39.2(24)  39.0   0.00 
  -2  -4  -6 o  63.3(27)  64.0  180.00
  -2  -4  -5 o  35.6(26)  31.0   0.00 
  -2  -3  -6 o  32.7(15)  30.1   0.00 
  -2  -3  -5 o   4.4(10)   3.4  180.00
  -2  -3  -4 o  29.7(15)  29.6   0.00 
  -2  -3  -3 o  43.1(17)  43.5   0.00 
  -2  -2  -6 o  54.6(17)  53.2   0.00 
  -2  -2  -4 o   6.1(7)    7.4   0.00 
  -2  -2  -3 o   9.3(8)    9.1  180.00
  -1  -2  -3 o  35.8(14)  33.8  180.00
  -1  -2  -2 o   6.4(5)    5.4   0.00 
  -1  -1  -3 o   168(5)   181.   0.00 
  -1  -1  -2 o  14.8(8)   11.8  180.00
_reflns_number_total                   71
_reflns_limit_h_min                    -9
_reflns_limit_h_max                    -1
_reflns_limit_k_min                    -11
_reflns_limit_k_max                    -1
_reflns_limit_l_min                    -19
_reflns_limit_l_max                    -2
_reflns_d_resolution_high              0.498
_reflns_d_resolution_low               4.153
data_UNOFA_s_60


loop_
      _refln_index_h
      _refln_index_k
      _refln_index_l
      _refln_observed_status
      _refln_F_squared_meas
      _refln_F_squared_calc
      _refln_phase_calc
  -6  -7 -23 <   31(10)     1.     0.00 
  -5  -8 -25 <   23(22)     2.     0.00 
  -5  -8 -23 <   14(15)     0.     0.00 
  -5  -8 -21 <   21(17)     4.     0.00 
  -5  -7 -27 <   35(17)     0.     0.00 
  -5  -7 -26 <   38(12)     0.     0.00 
  -5  -7 -25 <   18(11)     3.     0.00 
  -5  -7 -24 <   13(10)     2.     0.00 
  -5  -7 -21 <   50(23)    43.    180.00
  -5  -6 -27 <   20(18)     1.     0.00 
  -5  -6 -23 <   17(11)     2.    180.00
  -5  -6 -20 <    6(7)      1.    180.00
  -4  -9 -26 <   11(21)     6.     0.00 
  -4  -9 -24 <   20(11)     0.     0.00 
  -4  -9 -19 <   15(14)     0.    180.00
  -4  -8 -20 <   107(18)   44.    180.00
  -4  -7 -28 <   56(19)     0.     0.00 
  -4  -7 -25 <   21(10)     0.     0.00 
  -4  -7 -22 <   84(20)    47.    180.00
  -4  -7 -18 <   22(10)    10.     0.00 
  -4  -6 -30 <   39(15)     0.    180.00
  -4  -6 -26 <   14(13)     0.    180.00
  -4  -6 -25 <   25(15)     1.    180.00
  -4  -6 -20 <   13(7)      6.     0.00 
  -4  -6 -18 <   12(6)      8.    180.00
  -4  -6 -17 o    6(6)      0.    180.00
  -4  -5 -24 <   20(7)      0.    180.00
  -4  -5 -21 <   13(6)      2.    180.00
  -4  -5 -19 o    8(5)      3.    180.00
  -4  -5 -16 o    8(4)      6.     0.00 
  -3  -9 -26 <   67(26)     1.     0.00 
  -3  -9 -23 <   22(14)     0.     0.00 
  -3  -9 -19 <   47(19)     1.     0.00 
  -3  -8 -20 <   21(8)      0.    180.00
  -3  -7 -23 <   53(13)    16.    180.00
  -3  -7 -21 <   22(8)     25.     0.00 
  -3  -7 -20 <   31(10)     4.    180.00
  -3  -7 -18 <   21(10)     7.     0.00 
  -3  -7 -17 <   11(9)     12.     0.00 
  -3  -7 -16 o   46(9)     10.     0.00 
  -3  -6 -31 <   26(14)     0.    180.00
  -3  -6 -30 <   16(15)     0.    180.00
  -3  -6 -29 <   21(12)     0.     0.00 
  -3  -6 -28 <   30(12)     1.    180.00
  -3  -6 -23 <   18(11)     2.     0.00 
  -3  -6 -19 <    6(5)      0.     0.00 
  -3  -5 -26 <    3(7)      0.     0.00 
  -3  -5 -21 o   14(5)      7.     0.00 
  -3  -5 -20 o   16(6)      7.    180.00
  -3  -5 -19 o   17(6)     10.     0.00 
  -3  -5 -16 o   29(7)     14.     0.00 
  -3  -5 -14 o    7(5)      3.    180.00
  -3  -4 -19 o    8(6)      4.    180.00
  -3  -4 -18 o   68(9)     40.     0.00 
  -3  -4 -16 o   25(5)     29.     0.00 
  -3  -4 -12 o  10.0(32)    8.1   180.00
  -2  -9 -22 <   23(12)     2.     0.00 
  -2  -8 -28 <   32(10)     0.     0.00 
  -2  -8 -26 <   53(20)    29.     0.00 
  -2  -8 -24 <    5(8)      0.    180.00
  -2  -8 -18 <    1(7)      9.    180.00
  -2  -7 -30 <   43(12)     8.     0.00 
  -2  -7 -28 <   61(14)    39.     0.00 
  -2  -7 -24 <   14(7)     21.    180.00
  -2  -7 -23 <   30(12)     3.     0.00 
  -2  -7 -22 <    7(8)      0.    180.00
  -2  -7 -15 o   14(4)      1.    180.00
  -2  -6 -26 <   12(12)    18.    180.00
  -2  -6 -25 <   15(10)     2.    180.00
  -2  -6 -21 <    6(5)      0.     0.00 
  -2  -6 -19 o    5(4)      7.    180.00
  -2  -6 -16 o   10(5)     10.    180.00
  -2  -6 -14 o   10(4)      4.     0.00 
  -2  -6 -13 o   15(5)      6.    180.00
  -2  -6 -12 o    7(4)      0.     0.00 
  -2  -5 -22 o    7(4)     10.     0.00 
  -2  -5 -15 o   0.6(22)    2.5    0.00 
  -2  -5 -14 o   5.4(31)    7.0   180.00
  -2  -5 -13 o   17(4)     18.    180.00
  -2  -5 -12 o  13.7(31)   15.2   180.00
  -2  -5 -11 o   7.0(19)    5.5   180.00
  -2  -4 -21 o   24(5)     23.     0.00 
  -2  -4 -20 o   32(5)     29.    180.00
  -2  -4 -19 o   46(5)     50.     0.00 
  -2  -4 -17 o   8.1(34)    0.0   180.00
  -2  -4 -16 o   9.7(33)   10.4    0.00 
  -2  -4 -13 o  34.8(33)   40.9   180.00
  -2  -4 -11 o  64.2(34)   69.0   180.00
  -2  -4 -10 o   8.5(17)   11.0    0.00 
  -2  -3 -16 o   8.0(28)    4.8    0.00 
  -2  -3 -15 o  29.7(29)   27.1   180.00
  -2  -3 -14 o   2.3(12)    1.8   180.00
  -2  -3 -13 o   7.5(21)    6.8   180.00
  -2  -3 -12 o   61(4)     63.    180.00
  -2  -3 -11 o  33.6(25)   32.1    0.00 
  -2  -3 -10 o  90.8(32)   88.2   180.00
  -2  -3  -9 o  44.4(23)   44.2    0.00 
  -1  -8 -24 <   21(10)    10.     0.00 
  -1  -7 -25 <   41(12)    43.    180.00
  -1  -7 -22 <   31(8)      7.    180.00
  -1  -7 -20 <   19(7)     18.     0.00 
  -1  -7 -19 <   29(8)     25.     0.00 
  -1  -6 -21 o   17(7)      0.     0.00 
  -1  -6 -20 o    8(4)      5.     0.00 
  -1  -6 -19 o    2(4)      0.     0.00 
  -1  -5 -17 o   8.2(33)    9.4    0.00 
  -1  -5 -15 o   2.5(29)    1.8   180.00
  -1  -4 -15 o   2.3(12)    2.2    0.00 
  -1  -4 -14 o  14.7(23)   16.5   180.00
  -1  -4 -13 o   68(4)     63.     0.00 
  -1  -4 -12 o   89(4)     82.     0.00 
  -1  -4 -11 o   1.4(9)     1.5   180.00
  -1  -4 -10 o  40.3(24)   39.7    0.00 
  -1  -4  -9 o  105.5(33)  111.3  180.00
  -1  -3 -13 o  15.6(23)   15.6   180.00
  -1  -3 -12 o  59.1(28)   56.7    0.00 
  -1  -3 -11 o   1.2(7)     0.8    0.00 
  -1  -3 -10 o  12.6(15)   11.0   180.00
  -1  -3  -9 o  33.9(20)   33.1    0.00 
  -1  -3  -8 o  12.9(18)   15.5   180.00
  -1  -3  -7 o  27.7(17)   28.2    0.00 
  -1  -3  -6 o  13.1(12)   13.0    0.00 
  -1  -2 -10 o  23.7(16)   21.9    0.00 
  -1  -2  -9 o   0.5(5)     0.4   180.00
  -1  -2  -8 o  20.0(15)   19.4    0.00 
  -1  -2  -6 o   2.8(6)     2.4   180.00
  -1  -2  -5 o  12.0(10)   12.9   180.00
_reflns_number_total                   66
_reflns_limit_h_min                    -6
_reflns_limit_h_max                    -1
_reflns_limit_k_min                    -9
_reflns_limit_k_max                    -2
_reflns_limit_l_min                    -31
_reflns_limit_l_max                    -5
_reflns_d_resolution_high              0.494
_reflns_d_resolution_low               2.327
#--eof--eof--eof--eof--eof--eof--eof--eof--eof--eof--eof--eof--eof--eof--eof--#
